# Supplementary material for: Experimental and theoretical study of α-acetoxylation of ketones by (diacetoxy)iodobenzene
Source: Royal Society of Chemistry journal article supplement (doi:10.1039/d3nj01563g), 2023-01-01

## Supporting information

### Experimental and theoretical study of $\alpha$ - acetoxylation of ketones by (diacetoxy)iodobenzene

*Oswaldo J. Quintana-Romero, Alejandro Hernández-Tanguma, Jorge Camacho-Ruiz,*

*Armando Ariza-Castolo.*

## Content:

|                                                              |            |
|--------------------------------------------------------------|------------|
| <u>General Information</u>                                   | <u>S1</u>  |
| <u>Synthesis of <math>\alpha</math>-acetoxyketones</u>       | <u>S1</u>  |
| <u>Cross-over acid experiment</u>                            | <u>S9</u>  |
| <u>Kinetic determination of <b>3a</b> the obtention</u>      | <u>S9</u>  |
| <u>Kinetic study of the 4-<i>tert</i>-butylcyclohexanone</u> | <u>S10</u> |
| <u>Experimental part for kinetic determination</u>           | <u>S14</u> |
| <u>Computational details</u>                                 | <u>S21</u> |
| <u>Reference</u>                                             | <u>S29</u> |
| <u>IR and NMR spectra</u>                                    | <u>S30</u> |

## General Information

All reagents were purchased from Sigma-Aldrich and used without previous purification. The NMR spectra were recorded using a JEOL ECA-500 spectrometer with a magnetic field of 11.75 T ( $^1\text{H}$ , 500.160 MHz;  $^{13}\text{C}$ , 125.765 MHz). The unified scale was used with TMS as reference diluted (volume fraction  $\varphi < 1\%$ ) in chloroform for  $^1\text{H}$  resonance ( $(\text{CH}_3)_4\text{Si}$   $^1\text{H}$ ,  $^{13}\text{C} = 0$ ).<sup>1</sup> The UV/Vis absorption spectra were recorded with a Perkin Elmer Lambda 2S UV-VIS spectrophotometer. Low resolution mass spectra were acquired with HPLC/coupled mass Agilent Technologies (ESI).

## Synthesis of $\alpha$ -acetoxyketones

**General procedure:** In a flask, 1 equivalent of the corresponding ketone and 2.5 equivalents of  $\text{PhI}(\text{OAc})_2$  were dissolved in the appropriate solvent, and 10 equivalents of acetic acid were added. The reaction mixture was stirred for 3 days at  $70^\circ\text{C}$ . The solvent was evaporated, and the samples were purified by column chromatography using silica gel (60 Å, 200-240 mesh) and hexane/ethyl acetate 8:2 as the eluent.

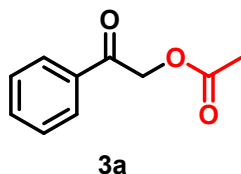

**2-Oxo-2-phenylethyl acetate (3a):**  $^1\text{H}$  NMR ( $\text{CDCl}_3$ , 500 MHz):  $\delta$  7.93 (2H, d,  $J = 7.4$  Hz), 7.62 (1H, t,  $J = 7.4$  Hz), 7.50 (2H, t,  $J = 7.4$  Hz), 5.35 (2H, s), 2.25 (3H, s).  $^{13}\text{C}\{^1\text{H}\}$  NMR ( $\text{CDCl}_3$ , 125 MHz):  $\delta$  192.27, 170.58, 134.29, 134.04, 128.99, 127.89, 66.15, 20.71. MS ES-API  $m/z$ :  $M^+$  179.1. The spectral data are in accordance with previous reports.<sup>2-4</sup>

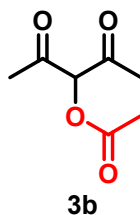

**2,4-Dioxopentan-3-yl, acetate (3b):**  $^1\text{H}$  NMR ( $\text{CDCl}_3$ , 500 MHz):  $\delta$  5.42 (1H, s), 2.22 (6H, s), 2.18 (3H, s); enol tautomer 14.4 (br, 1H), 2.20 (s, 3H), 2.19 (s, 6H).  $^{13}\text{C}\{^1\text{H}\}$  NMR ( $\text{CDCl}_3$ , 125 MHz):  $\delta$  199.14, 169.32, 85.12, 27.33, 20.48; enol tautomer 184.78, 169.40, 128.20. ES-API  $m/z$ :  $M^+$  159.1. The spectral data are in accordance with previous reports.<sup>5</sup>

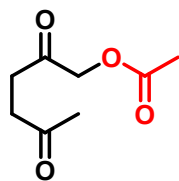

3d-1

**2,5-Dioxohexyl, acetate (3d-1):**  $^1\text{H}$  NMR ( $\text{CDCl}_3$ , 500 MHz):  $\delta$  4.66 (2H, s), 2.73 (2H, t,  $J = 6.7$  Hz), 2.60 (2H, t,  $J = 6.7$  Hz), 2.12 (3H, s), 2.10 (3H, s).  $^{13}\text{C}\{^1\text{H}\}$  NMR ( $\text{CDCl}_3$ , 125 MHz):  $\delta$  206.82, 202.29, 170.35, 68.06, 36.65, 32.29, 29.77, 20.49. ES-API  $m/z$ :  $M^+$  173.1. The spectral data are in agreement with previous reports.<sup>6</sup>

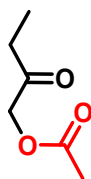

3e-1

**2-Oxobutyl, acetate (3e-1):**  $^1\text{H}$  NMR ( $\text{CDCl}_3$ , 500 MHz):  $\delta$  4.43 (1H, s), 2.43 (2H, q,  $J = 7.4$  Hz), 2.15 (3H, s), 1.08 (3H, t,  $J = 7.4$  Hz).  $^{13}\text{C}\{^1\text{H}\}$  NMR ( $\text{CDCl}_3$ , 125 MHz):  $\delta$  204.53, 170.40, 67.82, 32.14, 20.58, 7.22. ES-API  $m/z$ :  $M^+$  131.0. The spectral data are in agreement with previous reports.<sup>7</sup>

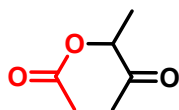

3e-3

**2-Oxobutyl-3-acetate (3e-3):**  $^1\text{H}$  NMR ( $\text{CDCl}_3$ , 500 MHz):  $\delta$  5.19 (1H, q,  $J = 7.1$  Hz), 2.15 (3H, s), 2.12 (3H, s), 1.43 (3H, d,  $J = 7.1$  Hz).  $^{13}\text{C}\{^1\text{H}\}$  NMR ( $\text{CDCl}_3$ , 125 MHz):  $\delta$  205.73, 170.46, 74.98, 25.73, 20.81, 16.04. ES-API  $m/z$ :  $M^+$  131.0. The spectral data are in agreement with previous reports.<sup>7</sup>

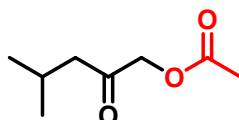

3f

**4-Methyl-2-oxopentyl, acetate (3f):**  $^1\text{H}$  NMR ( $\text{CDCl}_3$ , 500 MHz):  $\delta$  4.60 (2H, s), 2.26 (2H, d,  $J = 6.7$  Hz), 2.14 (1H, m), 2.14 (3H, s), 0.92 (6H, d,  $J = 6.4$  Hz).  $^{13}\text{C}\{^1\text{H}\}$  NMR ( $\text{CDCl}_3$ , 125 MHz):  $\delta$  203.60, 170.38, 68.43, 47.66, 24.58, 22.60, 20.58. ES-API  $m/z$ :  $M^+$  159.1. The spectral data are in agreement with previous reports.<sup>8</sup>

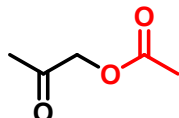

**3g**

**2-Oxopropyl, acetate (3g):**  $^1\text{H}$  NMR ( $\text{CDCl}_3$ , 500 MHz):  $\delta$  4.64 (2H, s), 2.16 (3H, s), 2.15 (3H, s).  $^{13}\text{C}$   $\{^1\text{H}\}$  NMR ( $\text{CDCl}_3$ , 125 MHz):  $\delta$  201.64, 170.18, 68.39, 26.15, 20.57. ES-API  $m/z$ :  $M^+$  117.5. The spectral data are in agreement with previous reports.<sup>9</sup>

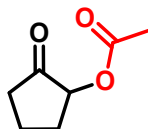

**3h**

**2-Oxocyclopentyl, acetate (3h):**  $^1\text{H}$  NMR ( $\text{CDCl}_3$ , 500 MHz):  $\delta$  5.04 (1H, dt,  $J = 1.4$ , 10.2 Hz), 2.40 (1H, m), 2.33 (1H, m), 2.23 (1H, quint,  $J = 9.5$ ), 2.11 (3H, s), 2.08 (1H, m), 1.83 (2H, m).  $^{13}\text{C}$   $\{^1\text{H}\}$  NMR ( $\text{CDCl}_3$ , 125 MHz):  $\delta$  212.62, 170.31, 75.80, 34.92, 28.47, 20.85, 17.18. ES-API  $m/z$ :  $M^+$  143.1. The spectral data are in agreement with previous reports.<sup>7,10-13</sup>

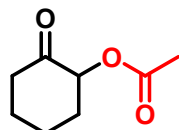

**3i**

**2-Oxocyclohexyl, acetate (3i):**  $^1\text{H}$  NMR ( $\text{CDCl}_3$ , 500 MHz):  $\delta$  5.09 (1H, dd,  $J = 6.3$ , 12.0 Hz), 2.43 (1H, ddt,  $J = 2.4$ , 4.5, 13.7 Hz), 2.33 (1H, dt,  $J = 6.0$ , 13.7 Hz), 2.23 (1H, m), 2.08 (3H, s), 2.03 (1H, dq,  $J = 2.8$ , 6.0, 13.0 Hz), 1.91 (1H, m), 1.70 (2H, m), 1.56 (1H, tq,  $J = 3.8$ , 13.0 Hz).  $^{13}\text{C}$   $\{^1\text{H}\}$  NMR ( $\text{CDCl}_3$ , 125 MHz):  $\delta$  204.67, 170.06, 76.61, 40.73, 33.10, 27.21, 23.79, 20.78. ES-API  $m/z$ :  $M^+$  157.1. The spectral data are in agreement with previous reports.<sup>10,12,14</sup>

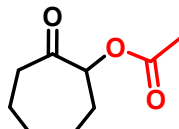

**3j**

**2-Oxocycloheptyl, acetate (3j):**  $^1\text{H}$  NMR ( $\text{CDCl}_3$ , 500 MHz):  $\delta$  5.19 (1H, dd,  $J = 3.5$ , 9.8 Hz), 2.60 (1H, dt,  $J = 5.6$ , 16.6 Hz), 2.38 (1H, ddd,  $J = 4.5$ , 10.9, 15.8 Hz), 2.08 (3H, s), 1.95 (1H, dq,  $J = 3.1$ , 13.7 Hz), 1.80 (3H, m), 1.70 (2H, m), 1.59 (1H, qd,  $J = 2.4$ , 10.6 Hz), 1.31 (1H, m).  $^{13}\text{C}$   $\{^1\text{H}\}$  NMR ( $\text{CDCl}_3$ , 125 MHz):  $\delta$  207.75, 170.30, 78.21, 40.74, 30.34 (2C), 28.52, 26.51, 23.06, 20.80. ES-API  $m/z$ :  $M^+$  171.1. The spectral data are in agreement with previous reports.<sup>15,16</sup>

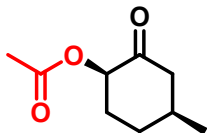

*cis*-3n-5

**Cis-4-methyl-2-oxocyclohexyl, acetate (*cis*-3n-5):**  $^1\text{H}$  NMR ( $\text{CDCl}_3$ , 500 MHz):  $\delta$  5.01 (1H, dd,  $J = 6.3, 10.9$  Hz), 2.48 (1H, dd,  $J = 5.3, 12.7$  Hz), 2.20 (1H, m), 2.17 (1H, m), 2.05 (3H, s), 1.95 (1H, m), 1.92 (1H, m), 1.67 (1H, m), 1.52 (1H, dd,  $J = 2.8, 13.4$  Hz), 0.95 (3H, d,  $J = 6.3$  Hz).  $^{13}\text{C}$   $\{^1\text{H}\}$  NMR ( $\text{CDCl}_3$ , 125 MHz):  $\delta$  204.97, 170.10, 76.46, 46.77, 34.33, 31.63, 24.42, 22.21, 20.73. ES-API  $m/z$ :  $M^+$  171.1.

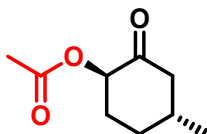

*trans*-3n-5

**Trans-4-methyl-2-oxocyclohexyl, acetate (*trans*-3n-5):**  $^1\text{H}$  NMR ( $\text{CDCl}_3$ , 500 MHz):  $\delta$  5.05 (1H, ddd,  $J = 1.0, 6.7, 12.7$  Hz), 2.35 (1H, ddd,  $J = 2.8, 3.8, 13.4$  Hz), 2.16 (1H, m), 2.05, (3H, s), 2.05 (1H, m), 1.84 (1H, m), 1.77 (1H, m), 1.66 (1H, qd,  $J = 3.5, 13.4$  Hz), 1.42 (1H, qd,  $J = 3.5, 13.4$  Hz), 0.95 (3H, d,  $J = 6.3$  Hz).  $^{13}\text{C}$   $\{^1\text{H}\}$  NMR ( $\text{CDCl}_3$ , 125 MHz):  $\delta$  203.99, 170.00, 76.26, 48.61, 35.03, 32.16, 31.63, 22.11, 20.73. ES-API  $m/z$ :  $M^+$  171.1.

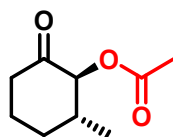

*trans*-3n-2

**Trans-(3-methyl-2-oxocyclohexyl) acetate (*trans*-3n-2):** The mixture of isomers could not be separated by chromatography over silica gel, however, **15b** was also present in the reaction mixture as evidenced by the signal at 5.15 ppm  $^1\text{H}$  NMR ( $\text{CDCl}_3$ , 500 MHz).

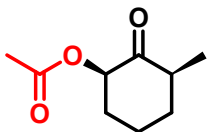

*cis*-3o-2

**Cis-3-methyl-2-oxocyclohexyl, acetate (*cis*-3o-2):**  $^1\text{H}$  NMR ( $\text{CDCl}_3$ , 500 MHz):  $\delta$  5.12 (1H, ddd,  $J = 1.0, 6.3, 12.3$  Hz), 2.48, (1H, septd,  $J = 1.06, 6.36$  Hz), 2.28 (1H, m), 2.13 (3H, s), 2.11 (1H, m), 2.05, (1H, m), 1.82 (1H, m), 1.72 (1H, m), 1.32 (1H, ddd,  $J = 3.8, 13.0$  Hz) 1.03 (3H, d,  $J = 6.3$  Hz).  $^{13}\text{C}$  $\{^1\text{H}\}$  NMR ( $\text{CDCl}_3$ , 125 MHz):  $\delta$

206.13, 170.05, 76.79, 44.34, 36.13, 33.49, 28.00, 20.82, 13.94. ES-API  $m/z$ :  $M^+$  171.1.

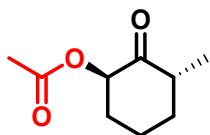

*trans-3o-2*

**Trans-3-methyl-2-oxocyclohexyl, acetate (*trans-3o-2*):** The mixture of isomers could not be separated by chromatography over silica gel. However, ***trans-3o-2*** was also present in the reaction mixture as evidenced by the signal at 5.13 ppm and 2.65 ppm correspondingly  $^1\text{H}$  NMR ( $\text{CDCl}_3$ , 500 MHz).

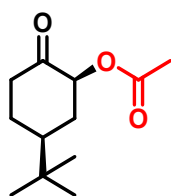

*cis-3p*

**Cis-4-tert-butyl-2-oxocyclohexyl, acetate (*cis-3p*):**  $^1\text{H}$  NMR ( $\text{CDCl}_3$ , 500 MHz):  $\delta$  5.17 (1H, ddd, ,  $J = 1.0, 6.3, 13.0$  Hz), 2.45 (1H, dq, ,  $J = 2.4, 4.2, 13.7$  Hz), 2.37 (1H, ddd, ,  $J = 1.0, 6.0, 13.7$  Hz), 2.27 (1H, dq, ,  $J = 2.18, 12.01$  Hz) 2.11 (3H, s), 2.07 (2H, m), 1.66 (1H, tt, ,  $J = 2.8, 12.3$  Hz) 1.53 (1H, q,  $J = 12.3$  Hz), 1.39 (1H, qd,  $J = 4.5, 13.4$  Hz), 0.89 (9H, s).  $^{13}\text{C}\{^1\text{H}\}$  NMR ( $\text{CDCl}_3$ , 125 MHz):  $\delta$  205.01, 170.08, 76.22, 45.83, 39.56, 34.25, 32.51, 27.65, 20.82. ES-API  $m/z$ :  $M^+$  213.1. The spectral data are in agreement with previous reports.<sup>17</sup>

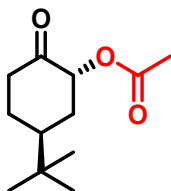

*trans-3p*

**Trans-4-tert-butyl-2-oxocyclohexyl, acetate (*trans-3p*):**  $^1\text{H}$  NMR ( $\text{CDCl}_3$ , 500.15992 MHz):  $\delta$  5.05 (1H, t,  $J = 5.6$  Hz), 2.54 (1H, ddd,  $J = 2.4, 6.0, 15.1$  Hz), 2.40 (1H, m), 2.15 (3H, s), 2.01 (2H, m), 1.80 (2H, m), 1.59 (1H, m), 0.90 (9H, s).  $^{13}\text{C}\{^1\text{H}\}$  NMR ( $\text{CDCl}_3$ , 125.7653 MHz):  $\delta$  208.30, 170.01, 75.56, 41.72, 41.36, 31.71, 29.75, 27.76, 20.99. ES-API  $m/z$ :  $M^+$  213.1. The spectral data are in agreement with previous reports<sup>17</sup> and it was determined as mixture with compound ***cis-3p***.

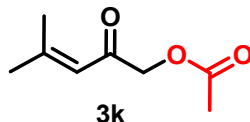

**4-Methyl-2-oxopent-3-enyl, acetate (3k):**  $^1\text{H}$  NMR ( $\text{CDCl}_3$ , 500 MHz):  $\delta$  6.00 (1H, septet,  $J = 1.0$  Hz), 4.61 (2H, s), 2.13 (3H, d,  $J = 1.0$  Hz), 2.12 (3H, s), 1.88 (3H, d,  $J = 1.0$  Hz).  $^{13}\text{C}$   $\{^1\text{H}\}$  NMR ( $\text{CDCl}_3$ , 125 MHz):  $\delta$  203.60, 170.38, 159.41, 118.93, 68.79, 23.01, 21.31, 20.62. ES-API  $m/z$ :  $M^+$  157.1. The spectral data are in agreement with previous reports.<sup>18</sup>

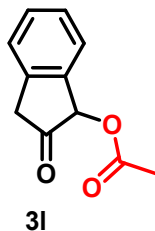

**2-Oxo-1,3-dihydroinden-1-yl, acetate (3l):**  $^1\text{H}$  NMR ( $\text{CDCl}_3$ , 500 MHz):  $\delta$  7.36 (4H, m), 5.97 (1H, s), 3.60 (1H, d,  $J = 22.0$  Hz), 3.67 (1H, d,  $J = 22.0$  Hz), 2.17 (3H, s).  $^{13}\text{C}\{^1\text{H}\}$  NMR ( $\text{CDCl}_3$ , 125 MHz):  $\delta$  209.53, 170.33, 137.18, 136.95, 129.71, 128.10, 125.31, 125.27, 75.38, 41.40, 20.69. ES-API  $m/z$ :  $M^+$  192.1. The spectral data are in agreement with previous reports.<sup>19</sup>

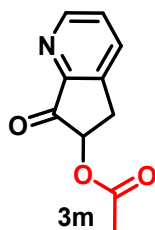

**7-Oxo-5,6-dihydrocyclopenta[b]pyridin-6-yl, acetate (3m):**  $^1\text{H}$  NMR ( $\text{CDCl}_3$ , 500 MHz):  $\delta$  8.81 (1H, d,  $J = 4.2$  Hz), 7.85 (1H, d,  $J = 7.7$  Hz), 7.50 (1H, dd,  $J = 4.5, 8.1$  Hz), 5.41 (1H, dd,  $J = 4.9, 8.1$  Hz), 3.68 (1H, dd,  $J = 8.12, 17.3$  Hz), 3.08 (1H, dd,  $J = 4.9, 17.31$  Hz), 2.18 (3H, s).  $^{13}\text{C}\{^1\text{H}\}$  NMR ( $\text{CDCl}_3$ , 125 MHz):  $\delta$  199.55, 170.38, 151.80, 151.64, 146.05, 135.36, 128.56, 72.77, 31.65, 20.75. ES-API  $m/z$ :  $M^+$  192.0.

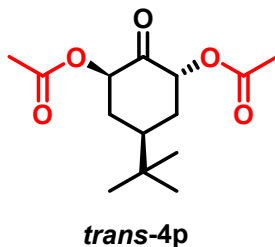

**Trans,Cis-5-(tert-butyl)-2-oxocyclohexane-1,3-diyl, diacetate (trans-4p):**  $^1\text{H}$  NMR ( $\text{CDCl}_3$ , 500.15992 MHz):  $\delta$  5.54 (1H, dd,  $J = 6.3, 12.7$  Hz), 5.12 (1H, t,  $J = 2.8$



Hz), 2.33 (1H, m), 2.29 (1H, m), 2.14 (3H, s), 2.13 (3H, s), 1.97 (1H, tt,  $J = 3.5, 12.7$  Hz), 1.55 (1H, m), 1.54 (1H, q,  $J = 12.7$  Hz), 0.91 (9H, s).  $^{13}\text{C}\{^1\text{H}\}$  NMR ( $\text{CDCl}_3$ , 125.7653 MHz):  $\delta$  201.26, 169.74, 169.39, 76.18, 73.82, 39.78, 34.62, 33.56, 27.66, 27.55, 20.96, 20.74. ES-API  $m/z$ :  $M^+$  271.1.

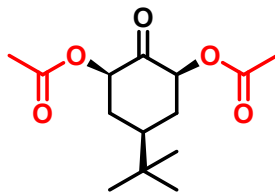

***cis-4p***

***Cis, Cis-5-(tert-butyl)-2-oxocyclohexane-1,3-diyloxy diacetate (cis-4p)***: ES-API  $m/z$ :  $M^+$  271.1. The mixture of isomers could not be separated by chromatography over silica gel. However, ***cis-4p*** was also present in the reaction mixture as evidenced by the signal at 5.27 ppm correspondingly  $^1\text{H}$  NMR ( $\text{CDCl}_3$ , 500.15992 MHz).

**Table S1.** Scope of the  $\alpha$ -acetoxy ketones.

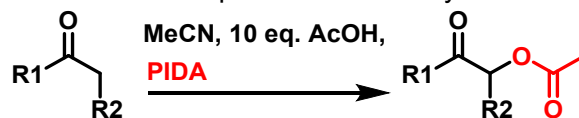

| Entry | Product                                                                              | Temp. (°C) | Conversion (%) <sup>a</sup>                                                                                              |
|-------|--------------------------------------------------------------------------------------|------------|--------------------------------------------------------------------------------------------------------------------------|
| 1     | <b>3a</b>                                                                            | 70         | 67 (60)                                                                                                                  |
| 2     | <b>3b</b>                                                                            | 70         | 98 (73)                                                                                                                  |
| 3     | <b>3c</b>                                                                            | 70         | 0                                                                                                                        |
| 4     | <b>3d-1 : 3d-3</b>                                                                   | 70         | 75 <sup>b</sup><br>[ <b>3d-1 : 3d-3</b> 2.57:1]                                                                          |
| 5     | <b>3e-1 : 3e-3</b>                                                                   | 70         | 95 <sup>b</sup><br>[ <b>3e-1 : 3e-3</b> 3.50:1]                                                                          |
| 6     | <b>3f</b>                                                                            | 60         | 80 (65)                                                                                                                  |
| 7     | <b>3g</b>                                                                            | 60         | 50 <sup>d</sup> (25)                                                                                                     |
| 8     | <b>3h</b>                                                                            | 70         | 75 (70)                                                                                                                  |
| 9     | <b>3i</b>                                                                            | 70         | 91 (85)                                                                                                                  |
| 10    | <b>3j</b>                                                                            | 70         | 77 (72)                                                                                                                  |
| 11    | <b>3k</b>                                                                            | 60         | 72 (60)                                                                                                                  |
| 12    | <b>3l</b>                                                                            | 40         | 60 (55)                                                                                                                  |
| 13    | <b>3m</b>                                                                            | 40         | 70 (68)                                                                                                                  |
|       | <b><i>cis</i>-3n-5 : <i>trans</i>-3n-5 :<br/><i>cis</i>-3n-2 : <i>trans</i>-3n-2</b> | 70         | 93 <sup>c</sup><br>[ <b><i>cis</i>-3n-5 : <i>trans</i>-3n-5 : <i>cis</i>-3n-2<br/>: <i>trans</i>-3n-2</b> 1.15:2.85:0:1] |
| 14    | <b><i>cis</i>-3o-2 : <i>trans</i>-3o-2</b>                                           | 70         | 73 <sup>c</sup><br>[ <b><i>cis</i>-3o-2 : <i>trans</i>-3o-2</b> 1:1.63]                                                  |
| 15    | <b><i>cis</i>-3p : <i>trans</i>-3p</b>                                               | 70         | 90 <sup>c</sup><br>[ <b><i>cis</i>-3p : <i>trans</i>-3p</b> 7.33:1]                                                      |

a) The percent conversion was determined from the crude reaction mixture by <sup>1</sup>H NMR spectroscopy. The yield % is in parenthesis and the selectivity ratio in brackets. b) Conversion calculated in the mixture. c) Direct determination from the crude reaction in order to prevent the loss due to the evaporation of the solvent.

## Cross-over acid experiment

**General procedure:** In a round-bottom flask, 0.17 mL (1.46 mmol) of acetophenone, 0.96 g (2.98 mmol) of  $\text{PhI}(\text{OAc})_2$ , and the corresponding equivalents of *p*-TsOH monohydrate and acetic acid were added in 3 mL of acetonitrile. The reaction mixture was stirred for 3 d at 70°C and allowed to cool to room temperature. After work-up, the solvent was removed under vacuum and the crude reaction mixture was analyzed by  $^1\text{H}$  NMR.

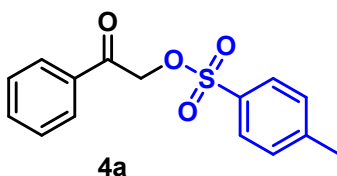

**2-Oxo-2-phenylethyl 4-methylbenzenesulfonate (4a):**  $^1\text{H}$  NMR ( $\text{CDCl}_3$ , 500 MHz):  $\delta$  7.82 (2H, d,  $J = 8.5$  Hz), 7.81 (2H, dd,  $J = 8.1, 1.1$  Hz), 7.58 (1H, tt,  $J = 7.4, 1.1$  Hz), 7.44 (2H, dd,  $J = 8.1, 7.4$  Hz), 7.31 (2H, d,  $J = 8.5$  Hz), 5.25 (2H, s), 2.41 (3H, s).  $^{13}\text{C}\{^1\text{H}\}$  NMR ( $\text{CDCl}_3$ , 125 MHz):  $\delta$  190.44, 145.44, 134.31, 133.81, 132.68, 130.03, 129.01, 128.21, 128.06, 70.10, 21.76. The spectral data are in agreement with previous reports.<sup>20,21</sup>

## Kinetic determination of 3a the obtention

**Procedure:** In a round-bottom flask, 0.17 mL (1.46 mmol) of acetophenone and 0.72 g (2.24 mmol) of  $\text{PhI}(\text{OAc})_2$  were dissolved in 3 mL of acetonitrile, and 0.85 mL (14.85 mmol) of acetic acid were added. The reaction mixture was stirred and monitored for 3 d at 70°C; each aliquot was taken per day. For the analysis of the aliquots, the solvent was removed under vacuum and the crude reaction mixture was analyzed by  $^1\text{H}$  NMR.

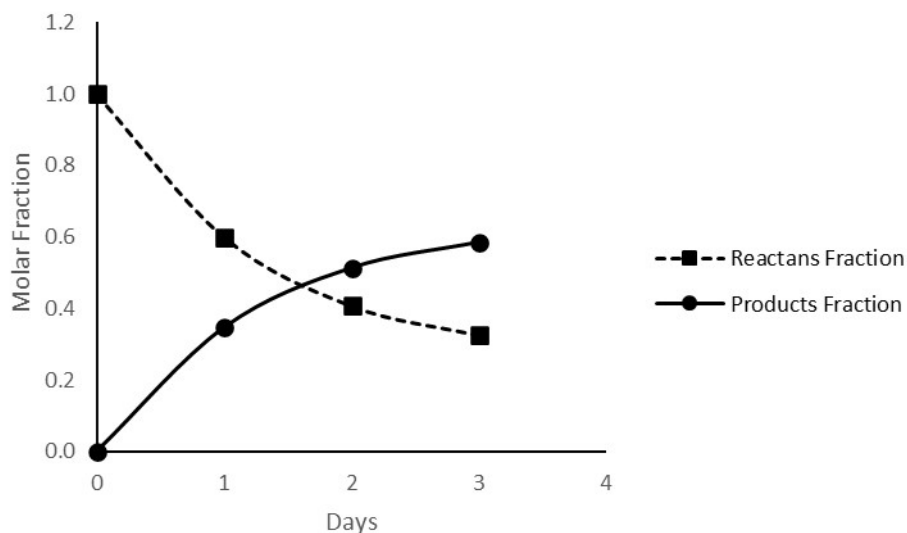

**Figure S1.** Kinetic  $\alpha$ -acetoxylation of acetophenone.

## Kinetic study of the 4-*tert*-butylcyclohexanone

Equation for kinetic determination.

The equations and methodology for the management of the kinetic data were consulted in the bibliography.<sup>22</sup>

[A] = Concentration of reactant 1.

[A]<sub>0</sub> = The initial concentration of reactant 1.

[B] = Concentration of reactant 2.

[B]<sub>0</sub> = The initial concentration of reactant 2.

[P] = Total product.

$k$  = rate constant of the reaction.

$k'$  = Observable constant rate of the reaction.

$t$  = time.

$$rate = k[A]$$

(Eq 1)

Estimated product equation:

$$[P] = rate * t$$

(Eq 2)

Zero order equation:

$$[A]_0 - [A] = kt$$

(Eq 3)

First order equation:

$$\ln\left(\frac{[A]_0}{[A]_0 - [P]}\right) = kt$$

(Eq 4)

Second order equation:

$$\left(\frac{1}{[B]_0 - [A]_0}\right) \ln\left(\frac{[A]_0[B]}{[B]_0[A]}\right) = kt$$

(Eq 5)

Pseudo first order equation:

$$\ln\left(\frac{[A]_0}{[A]_0 - [P]}\right) = k't$$

(Eq 6)

$$k[A][B]_0 = k'[A]$$

(Eq 7)

Approximation for isolate model:

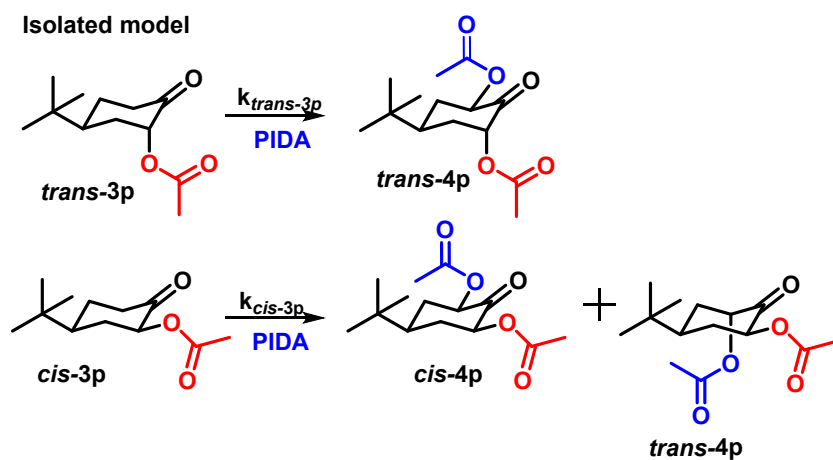

$$\ln [PIDA] = k'_{PIDA} t \quad (\text{Eq 8})$$

$$k'_{PIDA} ([trans - 3P]_0 + ([cis - 3P]_0)) = k_{PIDA} = k_{trans - 3p} + k_{cis - 3p} \quad (\text{Eq 9})$$

$$-k_{PIDA} \cong k_{P \text{ total}} = k_{trans - 4p} + k_{cis - 4p} \quad (\text{Eq 10})$$

$$\ln \left( \frac{([trans - 3P]_0 + ([cis - 3P]_0))}{([trans - 3P]_0 + ([cis - 3P]_0) - [trans - 4P])} \right) = k_{trans - 4P} t \quad (\text{Eq 11})$$

$$\ln \left( \frac{[cis - 3P]_0}{[cis - 3P]_0 - [trans - 4P]} \right) = k_{cis - 4P} t \quad (\text{Eq 12})$$

Approximation for connect model:

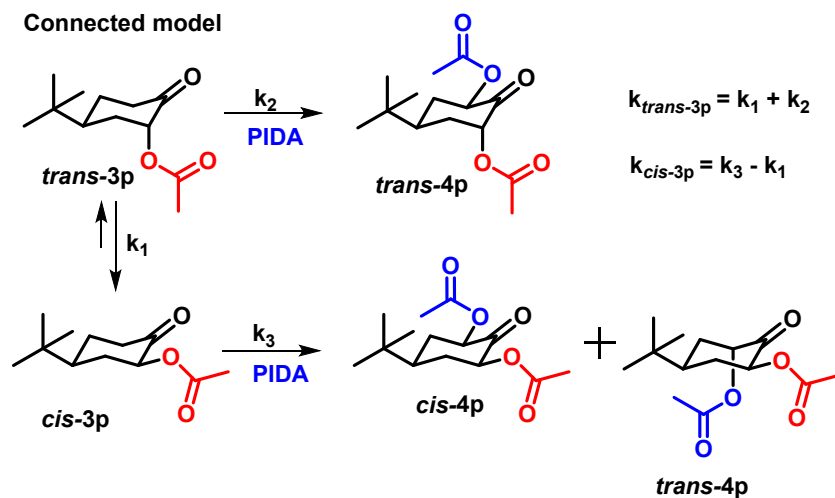

$$k'_{cis - 3p} \llll k'_{trans - 3P} \quad (\text{Eq 13})$$

$$k' \cong k'_{trans-3P}$$

(Eq 14)

$$\ln([trans-3P]) = k' t$$

(Eq 15)

$$k' [PIDA] = k = k_{trans-3P} + k_{cis-3P}$$

(Eq 16)

$$k_{trans-3P} = k_1 + k_2$$

(Eq 17)

$$k_{cis-3P} = k_3 - k_1$$

(Eq 18)

## Experimental part for kinetic determination.

First- $\alpha$ -acetoxylation.

**Procedure:** In a round-bottom flask, 0.23 g (1.49 mmol) of 4-*tert*-butylcyclohexanone and 0.96 g (2.98 mmol) of  $\text{PhI}(\text{OAc})_2$  were dissolved in 3mL of acetonitrile, and 0.85mL (14.85 mmol) of acetic acid were added. The reaction mixture was stirred and monitored for 6 d at 70°C; each aliquot was taken per period showed in the table S1. For the analysis of the aliquots, the solvent was removed under vacuum and the crude reaction mixture was analyzed by  $^1\text{H}$  NMR.

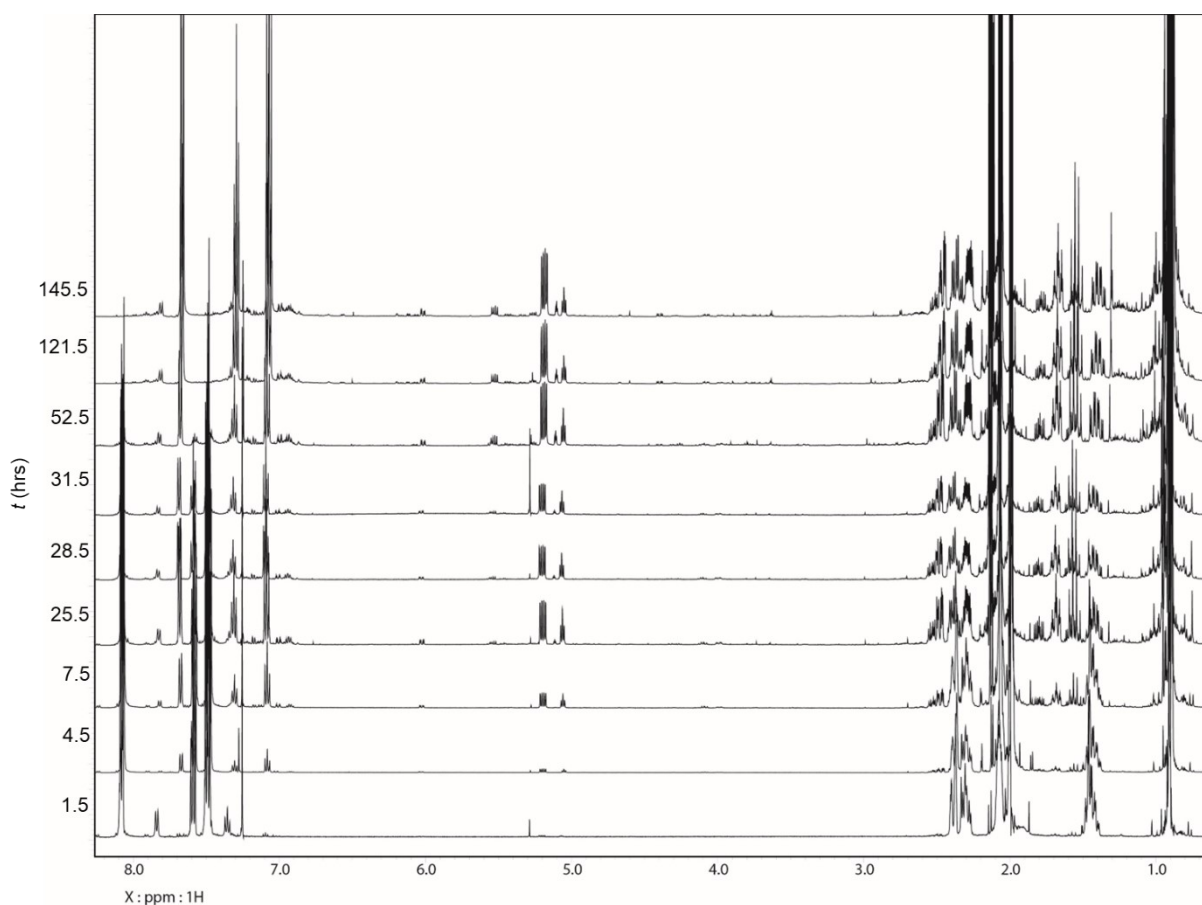

**Figure S2.** Kinetic  $\alpha$ -acetoxylation of 4-*tert*-butylcyclohexanone.



Table S1. Concentration of the reactants and products in the kinetic experiment of 4-*tert*-butylcyclohexanone.

| Time (hrs) | [PIDA] (M) | [ <i>t</i> -bcyhex] (M) | [ <i>cis</i> -3p] (M) | [ <i>trans</i> -3p] (M) | [ <i>trans</i> -4p] (M) | [ <i>cis</i> -4p] (M) | [P] (M) |
|------------|------------|-------------------------|-----------------------|-------------------------|-------------------------|-----------------------|---------|
| 0          | 1.3506     | 0.5402                  | 0                     | 0                       | 0                       | 0                     | 0       |
| 1.5        | 1.3203     | 0.5186                  | 0.0144                | 0.0073                  | 0                       | 0                     | 0.0217  |
| 4.5        | 1.0155     | 0.4566                  | 0.0494                | 0.0254                  | 0                       | 0                     | 0.0749  |
| 7.5        | 0.9421     | 0.3381                  | 0.1243                | 0.0594                  | 0                       | 0                     | 0.1838  |
| 25.5       | 0.4590     | 0.1138                  | 0.2831                | 0.1197                  | 0.0162                  | 0.0072                | 0.4028  |
| 28.5       | 0.4405     | 0.0661                  | 0.3036                | 0.1268                  | 0.0177                  | 0.0102                | 0.4305  |
| 31.5       | 0.4007     | 0.0397                  | 0.3253                | 0.1245                  | 0.0287                  | 0.0216                | 0.4499  |
| 52.5       | 0.0625     | 0.0109                  | 0.3432                | 0.1073                  | 0.0376                  | 0.0160                | 0.4506  |
| 121.5      | 0.0295     | 0.0292                  | 0.3356                | 0.0848                  | 0.0343                  | 0.0155                | 0.4205  |
| 145.5      | 0          | 0.0127                  | 0.3695                | 0.0881                  | 0.0393                  | 0.0089                | 0.4576  |

Pseudo-first order reaction method.

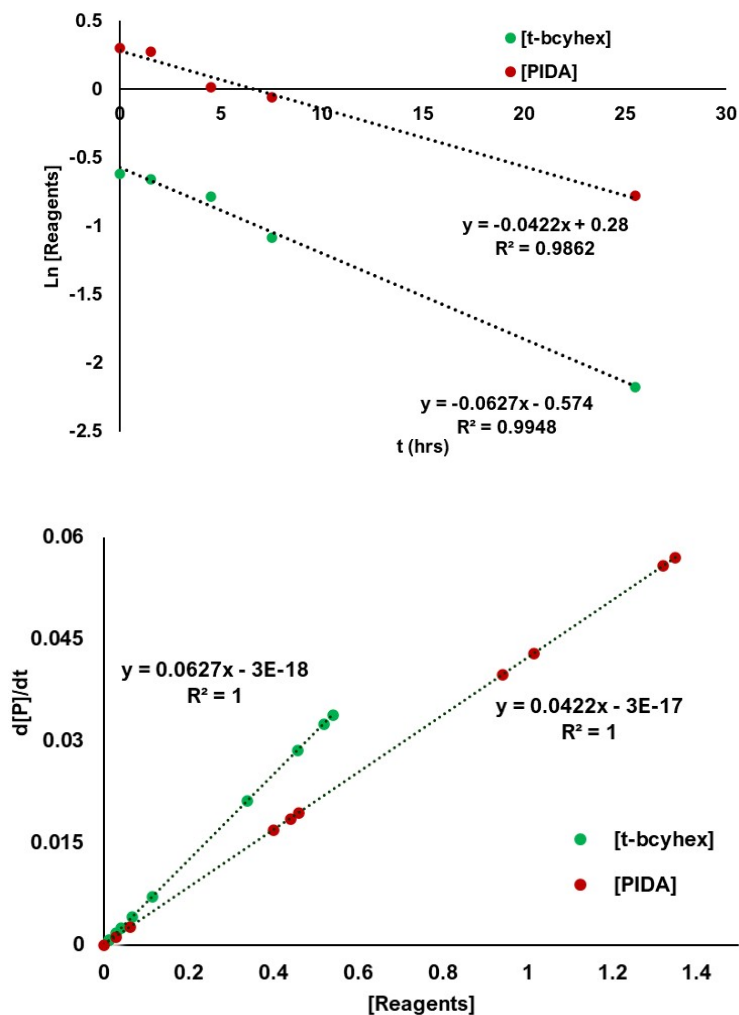

**Figure S3.** Top: Graphic of time VS natural logarithm (Ln) on the reagent concentrations in the mono  $\alpha$ -acetoxilation. Bottom: Graphic of the reagent concentration VS the reaction rates in the mono  $\alpha$ -acetoxilation

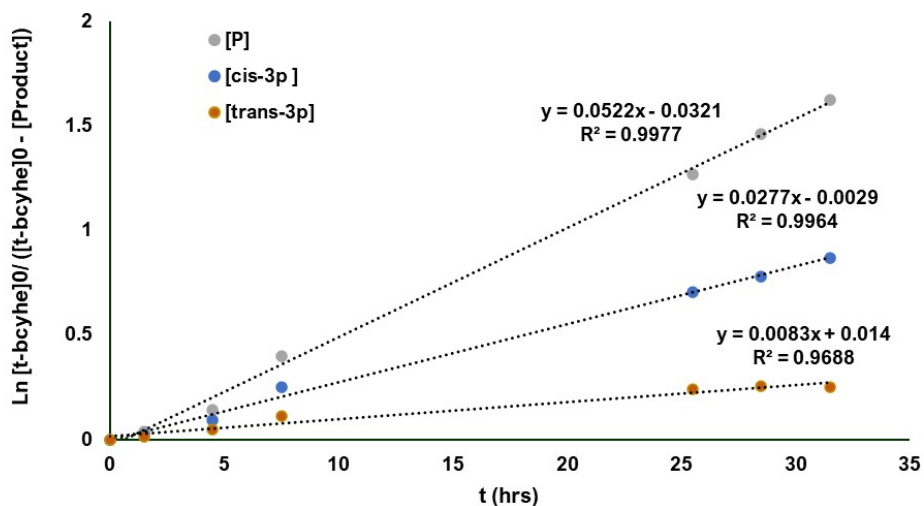

Table S2. Calculated rates and products with estimated constants rates.

| Time (hrs) | Calculated rates     |                         | Calculated products   |                       |                  |
|------------|----------------------|-------------------------|-----------------------|-----------------------|------------------|
|            | $d[\text{cis-3}]/dt$ | $d[\text{trans-3p}]/dt$ | $[\text{cis-3p}]$ (M) | $[\text{cis-3p}]$ (M) | $[\text{P}]$ (M) |
| 0          | 0                    | 0                       | 0                     | 0                     | 0                |
| 1.5        | 0.0335               | 0.0095                  | 0.0503                | 0.0142                | 0.0835           |
| 4.5        | 0.0258               | 0.0073                  | 0.1162                | 0.0329                | 0.1928           |
| 7.5        | 0.0239               | 0.0067                  | 0.1797                | 0.0508                | 0.2982           |
| 25.5       | 0.0116               | 0.0033                  | 0.2977                | 0.0842                | 0.4939           |
| 28.5       | 0.0112               | 0.0031                  | 0.3194                | 0.0904                | 0.5299           |
| 31.5       | 0.0101               | 0.0028                  | 0.3211                | 0.0908                | 0.5326           |
|            |                      | Error:                  | 73.35%                | 37.52%                | 94.57%           |

Second- $\alpha$ -acetoxylation.

**Procedure:** In a round-bottom flask, 0.0885 g (0.41 mmol) of the mixture of **cis-3n-6** and **trans-3n-6** (9:1) and 0.375 g (1.16 mmol) of  $\text{PhI}(\text{OAc})_2$  were dissolved in 1.2 mL of acetonitrile, and 0.32 mL (5.59 mmol) of acetic acid were added. The reaction mixture was stirred and monitored for 7 d at 70°C; each aliquot was taken per period showed in the table S3. For the analysis of the aliquots, the solvent was removed under vacuum and the crude reaction mixture was analyzed by  $^1\text{H}$  NMR.

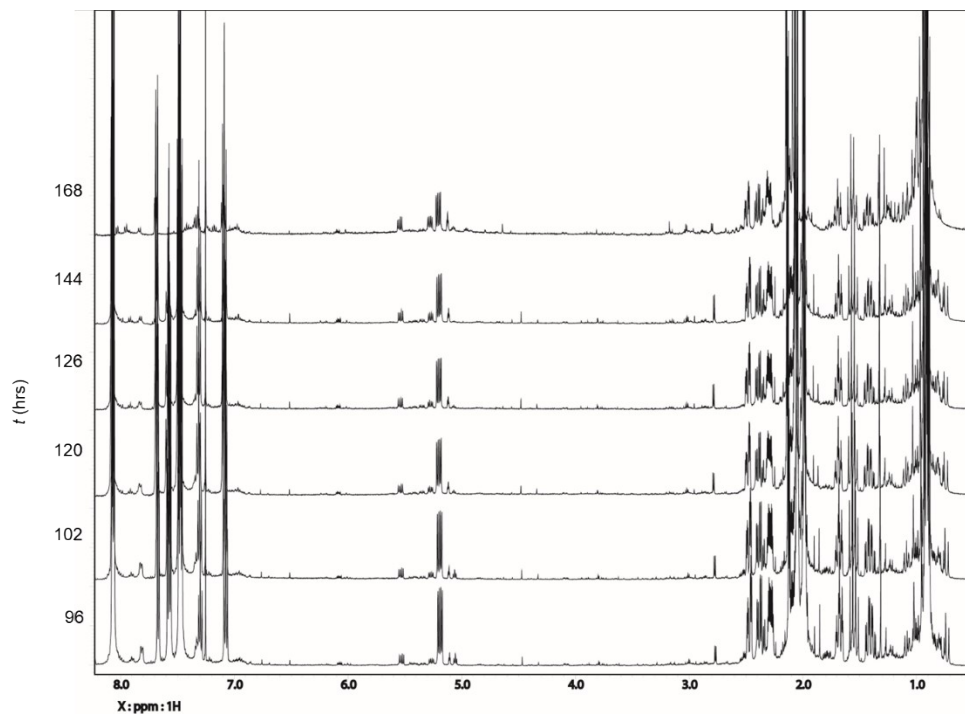

**Figure S4.** Kinetic  $\alpha$ -acetoxylation of **3p**.

Table S3. Concentration of the reactants and products in the kinetic experiment of 4-*tert*-butylcyclohexanon.

| Time (hrs) | [PIDA] (M) | [ <i>cis</i> -3p] (M) | [ <i>trans</i> -3p] (M) | [ <i>trans</i> -4p] (M) | [ <i>cis</i> -4p] (M) |
|------------|------------|-----------------------|-------------------------|-------------------------|-----------------------|
| 0          | 0.9701     | 0.2959                | 0.0273                  | 0                       | 0                     |
| 72         | 0.8180     | 0.2369                | 0.0263                  | 0.0176                  | 0.0194                |
| 96         | 0.7807     | 0.2292                | 0.0155                  | 0.0193                  | 0.0197                |
| 102        | 0.6543     | 0.2170                | 0.0152                  | 0.0205                  | 0.0225                |
| 120        | 0.3723     | 0.1765                | 0.0121                  | 0.0267                  | 0.0343                |
| 126        | 0.3459     | 0.1736                | 0.0107                  | 0.0269                  | 0.0346                |
| 144        | 0.1887     | 0.1588                | 0.0076                  | 0.0289                  | 0.0422                |
| 168        | 0.0155     | 0.1073                | 0                       | 0.0349                  | 0.0612                |

Pseudo-first order reaction method.

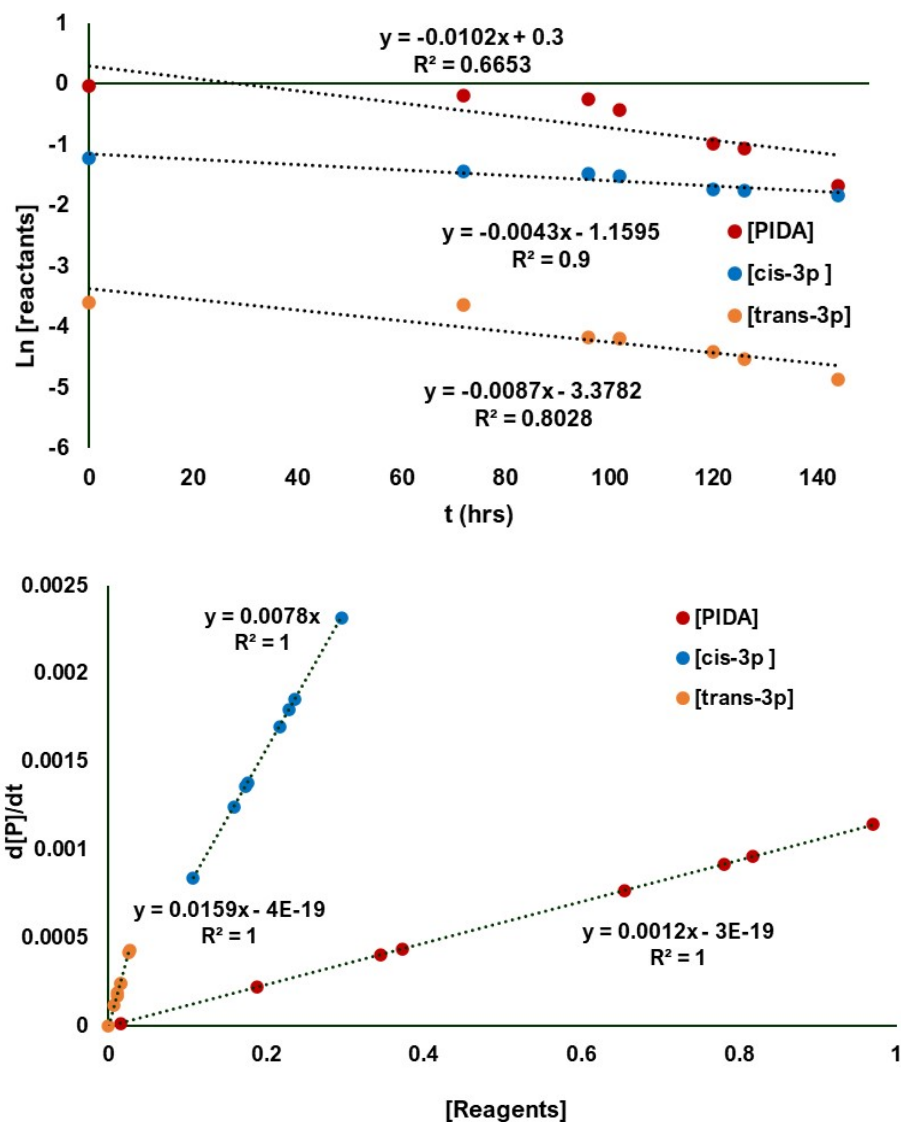

**Figure S5.** Top: graphic of the time VS mono and di  $\alpha$ -acetoxylation products of t-bcyhex. Bottom: graphic of the reagent concentration VS the reaction rates in the di  $\alpha$ -acetoxylation.

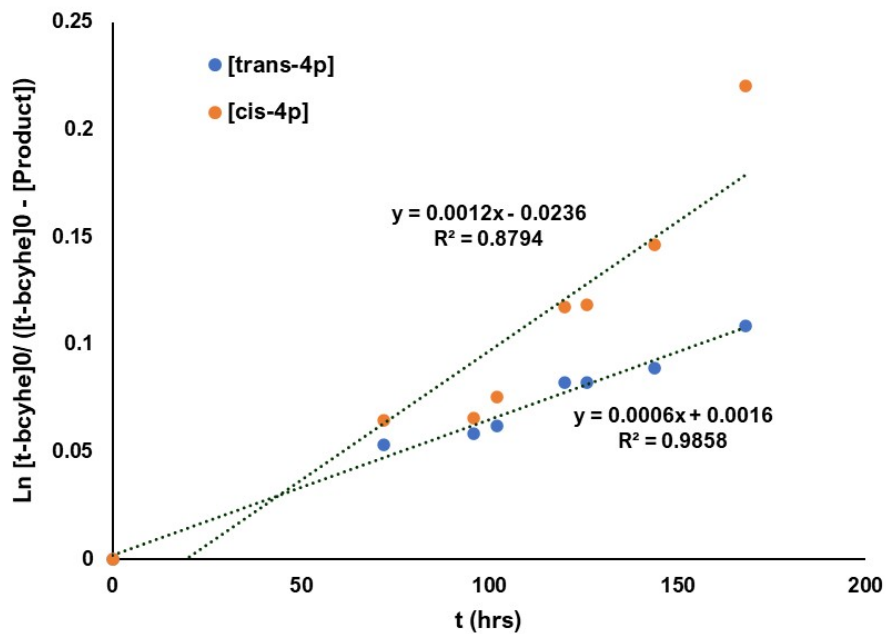

Table S4. Calculated rates and products of the two models with estimated constants rates.

| Time<br>(hrs) | Calculated rates                |                               |                                 |                                 |                               | Calculated products        |                          |                            |                          |
|---------------|---------------------------------|-------------------------------|---------------------------------|---------------------------------|-------------------------------|----------------------------|--------------------------|----------------------------|--------------------------|
|               | Isolated model                  |                               | Connected model                 |                                 |                               | Isolated model             |                          | Connected model            |                          |
|               | $\frac{d[\text{trans-4p}]}{dt}$ | $\frac{d[\text{cis-4p}]}{dt}$ | $\frac{d[\text{trans-4p}]}{dt}$ | $\frac{d[\text{trans-4p}]}{dt}$ | $\frac{d[\text{cis-4p}]}{dt}$ | $[\text{trans-4p}]$<br>(M) | $[\text{cis-4p}]$<br>(M) | $[\text{trans-4p}]$<br>(M) | $[\text{cis-4p}]$<br>(M) |
| 0             | 0.0003                          | 0.0007                        | 0.0003                          | 0.00004                         | 0.0003                        | 0.0000                     | 0.0000                   | 0.0000                     | 0.0000                   |
| 72            | 0.0002                          | 0.0005                        | 0.0003                          | 0.00004                         | 0.0002                        | 0.0148                     | 0.0379                   | 0.0243                     | 0.0174                   |
| 96            | 0.0002                          | 0.0005                        | 0.0002                          | 0.00002                         | 0.0002                        | 0.0183                     | 0.0488                   | 0.0191                     | 0.0224                   |
| 102           | 0.0002                          | 0.0005                        | 0.0002                          | 0.00002                         | 0.0002                        | 0.0185                     | 0.0491                   | 0.0199                     | 0.0226                   |
| 120           | 0.0001                          | 0.0004                        | 0.0001                          | 0.00002                         | 0.0002                        | 0.0177                     | 0.0470                   | 0.0186                     | 0.0216                   |
| 126           | 0.0001                          | 0.0004                        | 0.0001                          | 0.00002                         | 0.0002                        | 0.0181                     | 0.0486                   | 0.0174                     | 0.0223                   |
| 144           | 0.0001                          | 0.0004                        | 0.0001                          | 0.00001                         | 0.0002                        | 0.0187                     | 0.0508                   | 0.0142                     | 0.0233                   |
|               |                                 |                               |                                 |                                 | Error:                        | 22.59%                     | 76.30%                   | 26.53%                     | 23.65%                   |

## Computational details

The optimization of the geometries and calculation of the frequencies were carried using functional  $\omega$ B97X-D<sup>23</sup> with the basis set Def2TZVP<sup>24</sup> for C, H and O, and LANL2DZ for iodine atoms, with effective core potential and the addition of polarization (P) and diffuse (D) functions.<sup>25,26</sup> The addition of P and D functions to the LANL2DZ leads to geometries closer to those obtained by experimental methods as described previously by Cerioni and coworkers.<sup>27</sup> The free energy data was obtained with thermal correction in the frequency calculations. The NBO analysis was carried out with the basis set AUG-cc-pVTZ for C, H, and O atoms and AUG-cc-pVDZ-PP for I with effective core potential as described by Peterson.<sup>28</sup> The basis sets were obtained from Basis Set Exchange data base.<sup>29</sup> The NBO analysis included a solvation model (SMD) on acetonitrile. All the calculations were carried out using the Gaussian 09 suite.<sup>30</sup>

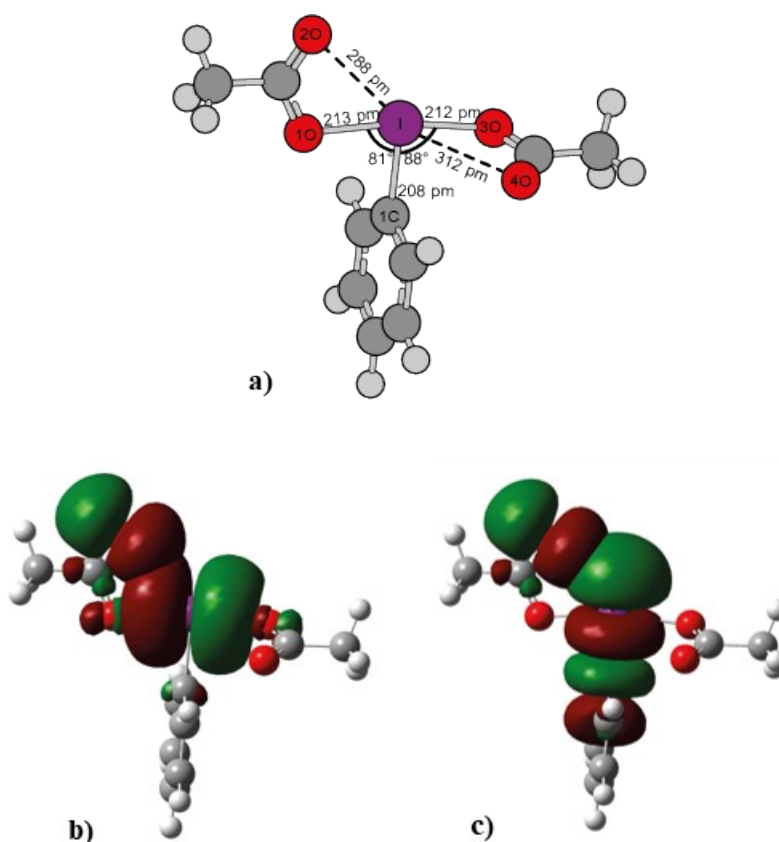

**Figure S6.** a) PIDA structure optimized by theoretical calculations. b) Orbital Interaction of the orbitals LP 2O to I LP\* of PIDA. c) Interaction of the orbitals 2O LP to I-1C  $\sigma^*$  (Iodine  $\sigma$ -hole) of PIDA.

---

**PIDA**

Zero-point correction= 0.194314 Hartree  
Thermal correction to Energy= 0.211129 Hartree  
Thermal correction to Enthalpy= 0.212073 Hartree  
Thermal correction to Gibbs Free Energy= 0.145779 Hartree  
Sum of electronic and zero-point Energies= -699.783163 Hartree  
Sum of electronic and thermal Energies= -699.766348 Hartree  
Sum of electronic and thermal Enthalpies= -699.765404  
Hartree  
Sum of electronic and thermal Free Energies= -699.831698  
Hartree

| Label | Symbol | X          | Y          | Z          |
|-------|--------|------------|------------|------------|
| 1     | C      | -0.5774439 | 1.1340211  | -0.0833819 |
| 2     | C      | -0.5407416 | 1.9916287  | -1.1695529 |
| 3     | C      | -1.2028173 | 3.2055033  | -1.0784005 |
| 4     | C      | -1.8842839 | 3.5411160  | 0.0819434  |
| 5     | C      | -1.9082303 | 2.6663412  | 1.1569215  |
| 6     | C      | -1.2494231 | 1.4479419  | 1.0844582  |
| 7     | H      | -0.0061657 | 1.7256336  | -2.0708955 |
| 8     | H      | -1.1844836 | 3.8876358  | -1.9182461 |
| 9     | H      | -2.4011273 | 4.4899532  | 0.1473860  |
| 10    | H      | -2.4421997 | 2.9273921  | 2.0611580  |
| 11    | H      | -1.2806599 | 0.7494808  | 1.9079283  |
| 12    | I      | 0.4289667  | -0.6907538 | -0.2186670 |
| 13    | O      | 2.1153612  | 0.5542135  | 0.1875642  |
| 14    | O      | -1.4182086 | -1.5915426 | -0.7398084 |
| 15    | C      | -2.2721369 | -1.8578683 | 0.2319494  |
| 16    | O      | -2.1043230 | -1.5508124 | 1.3902832  |
| 17    | C      | 3.2141983  | -0.1626968 | 0.2138144  |
| 18    | O      | 3.2203067  | -1.3624263 | 0.0191728  |
| 19    | C      | 4.4512945  | 0.6435040  | 0.5078315  |
| 20    | H      | 5.3232825  | -0.0046183 | 0.5020098  |
| 21    | H      | 4.5624575  | 1.4304786  | -0.2383283 |
| 22    | H      | 4.3488515  | 1.1250999  | 1.4805976  |
| 23    | C      | -3.4956001 | -2.5837716 | -0.2677958 |
| 24    | H      | -4.1530583 | -2.8153035 | 0.5657613  |
| 25    | H      | -4.0172711 | -1.9569590 | -0.9918343 |
| 26    | H      | -3.1988473 | -3.4986184 | -0.7806024 |

---



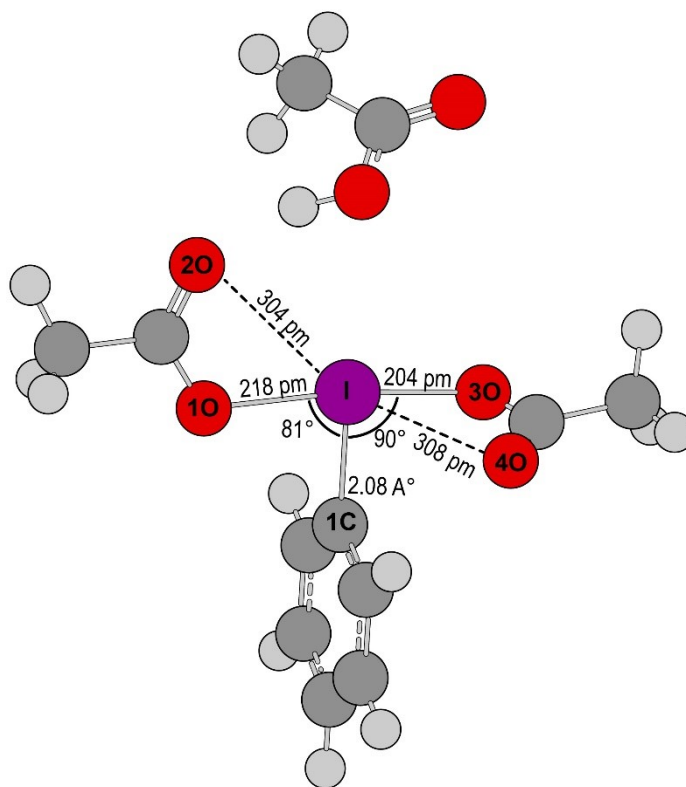

**Figure S7.** Activated PIDA with acetic acid structure optimized by theoretical calculations.

---

**PIDA-Acetic Acid**

Zero-point correction= 0.257737 Hartree  
 Thermal correction to Energy= 0.281003 Hartree  
 Thermal correction to Enthalpy= 0.281947 Hartree  
 Thermal correction to Gibbs Free Energy= 0.196523 Hartree  
 Sum of electronic and zero-point Energies= -928.841352 Hartree  
 Sum of electronic and thermal Energies= -928.818087 Hartree  
 Sum of electronic and thermal Enthalpies= -928.817143 Hartree  
 Sum of electronic and thermal Free Energies= -928.902566 Hartree

| Label | Symbol | X         | Y          | Z          |
|-------|--------|-----------|------------|------------|
| 1     | C      | 2.0616060 | -0.2834320 | -0.2415730 |
| 2     | C      | 2.5121750 | -0.8607700 | -1.4164290 |
| 3     | C      | 3.8756940 | -1.0395310 | -1.5852950 |
| 4     | C      | 4.7580980 | -0.6422010 | -0.5916480 |
| 5     | C      | 4.2839050 | -0.0648000 | 0.5758740  |
| 6     | C      | 2.9221180 | 0.1186420  | 0.7645340  |
| 7     | H      | 1.8194260 | -1.1691210 | -2.1870810 |
| 8     | H      | 4.2460980 | -1.4885900 | -2.4974590 |

|    |   |            |            |            |
|----|---|------------|------------|------------|
| 9  | H | 5.8224780  | -0.7820480 | -0.7299940 |
| 10 | H | 4.9730330  | 0.2468120  | 1.3497220  |
| 11 | H | 2.5420690  | 0.5851200  | 1.6621410  |
| 12 | I | 0.0083220  | -0.0167550 | 0.0199520  |
| 13 | O | 0.0877990  | -2.1713280 | 0.3531890  |
| 14 | O | 0.1971990  | 1.9867120  | -0.4829370 |
| 15 | C | 0.5576230  | 2.8315330  | 0.4783700  |
| 16 | O | 0.9660650  | 2.4849180  | 1.5599070  |
| 17 | C | -1.0652870 | -2.7258170 | 0.5513990  |
| 18 | O | -2.1298490 | -2.1162050 | 0.5554700  |
| 19 | C | -0.9997210 | -4.2116390 | 0.7882870  |
| 20 | H | -2.0025480 | -4.6244530 | 0.8545110  |
| 21 | H | -0.4422540 | -4.6910060 | -0.0159060 |
| 22 | H | -0.4606600 | -4.3992160 | 1.7176710  |
| 23 | C | 0.3876040  | 4.2642690  | 0.0536130  |
| 24 | H | 0.7797690  | 4.9244100  | 0.8221870  |
| 25 | H | 0.8967220  | 4.4363650  | -0.8943190 |
| 26 | H | -0.6740030 | 4.4605140  | -0.1020080 |
| 27 | O | -3.1011680 | 0.4371940  | 0.5759280  |
| 28 | H | -2.9389830 | -0.5242820 | 0.6308970  |
| 29 | C | -3.9617050 | 0.7416950  | -0.4098610 |
| 30 | C | -4.5599260 | -0.4444600 | -1.1258430 |
| 31 | H | -5.1398880 | -1.0465090 | -0.4240960 |
| 32 | H | -5.2021760 | -0.0966900 | -1.9294740 |
| 33 | H | -3.7707970 | -1.0841740 | -1.5244800 |
| 34 | O | -4.2103570 | 1.8837020  | -0.6663470 |

---

---

**2p-Ax**

Zero-point correction= 0.397524 Hartree  
Thermal correction to Energy= 0.421939 Hartree  
Thermal correction to Enthalpy= 0.422883 Hartree  
Thermal correction to Gibbs Free Energy= 0.340053 Hartree  
Sum of electronic and zero-point Energies= -937.646044 Hartree  
Sum of electronic and thermal Energies= -937.621629 Hartree  
Sum of electronic and thermal Enthalpies= -937.620684  
Hartree  
Sum of electronic and thermal Free Energies= -937.703514  
Hartree

| Label | Symbol | X          | Y          | Z          |
|-------|--------|------------|------------|------------|
| 1     | C      | 1.9022720  | 0.0946240  | 0.8612080  |
| 2     | C      | 2.4322970  | -0.4302350 | -0.4754760 |
| 3     | C      | 2.9650470  | -1.8483820 | -0.2508960 |
| 4     | C      | 1.8813750  | -2.7843970 | 0.2894150  |
| 5     | H      | 3.3491440  | -2.2732200 | -1.1773320 |
| 6     | H      | 1.5834240  | -0.5133570 | -1.1670320 |
| 7     | H      | 2.7266270  | 0.1193130  | 1.5826060  |
| 8     | H      | 1.5460540  | 1.1207760  | 0.7769150  |
| 9     | H      | 1.1276350  | -2.9461540 | -0.4918020 |
| 10    | H      | 2.2790840  | -3.7639460 | 0.5513900  |
| 11    | H      | 3.8015940  | -1.8192340 | 0.4541570  |
| 12    | C      | 3.4307600  | 0.5416350  | -1.1640640 |
| 13    | C      | 4.6094100  | 0.9007750  | -0.2540860 |
| 14    | H      | 5.3246300  | 1.5220140  | -0.7974260 |
| 15    | H      | 4.2887970  | 1.4645180  | 0.6236180  |
| 16    | H      | 5.1422920  | 0.0112980  | 0.0879880  |
| 17    | C      | 3.9735850  | -0.0948780 | -2.4491570 |
| 18    | H      | 3.1616370  | -0.4664340 | -3.0797600 |
| 19    | H      | 4.5328100  | 0.6439160  | -3.0266120 |
| 20    | H      | 4.6504290  | -0.9246200 | -2.2423600 |
| 21    | C      | 2.6940230  | 1.8280520  | -1.5590160 |
| 22    | H      | 3.3681290  | 2.4999060  | -2.0944420 |
| 23    | H      | 1.8504840  | 1.6070150  | -2.2180680 |
| 24    | H      | 2.3105460  | 2.3728060  | -0.6954950 |
| 25    | C      | 1.1413620  | -2.2433710 | 1.4919710  |
| 26    | O      | 0.7949760  | -2.9485200 | 2.4087290  |
| 27    | C      | 0.8080710  | -0.7751060 | 1.4653590  |
| 28    | H      | 0.5472150  | -0.4666420 | 2.4756070  |
| 29    | I      | -1.1284170 | -0.6395120 | 0.3405930  |
| 30    | C      | -1.0278340 | 1.4441450  | 0.5562420  |
| 31    | C      | -0.9062580 | 2.2257940  | -0.5775930 |
| 32    | C      | -1.0516900 | 1.9938220  | 1.8248610  |
| 33    | C      | -0.7893090 | 3.5989620  | -0.4291950 |
| 34    | H      | -0.9173410 | 1.7765490  | -1.5601730 |
| 35    | C      | -0.9319370 | 3.3692190  | 1.9586970  |
| 36    | H      | -1.1641640 | 1.3697340  | 2.7013510  |
| 37    | C      | -0.7966790 | 4.1692380  | 0.8347150  |
| 38    | H      | -0.6918220 | 4.2224020  | -1.3083520 |
| 39    | H      | -0.9517560 | 3.8124820  | 2.9457240  |
| 40    | H      | -0.7037720 | 5.2419750  | 0.9438550  |
| 41    | O      | -3.0433130 | 0.0398000  | -0.7889270 |
| 42    | C      | -3.5908690 | -1.0033480 | -1.3206380 |
| 43    | C      | -4.8662950 | -0.7229240 | -2.0872910 |
| 44    | H      | -5.6157900 | -0.3202650 | -1.4045470 |
| 45    | H      | -4.6803880 | 0.0337580  | -2.8502370 |
| 46    | H      | -5.2383690 | -1.6354400 | -2.5468090 |

47 O -3.1372910 -2.1383760 -1.2228650

---

### 2p-Eq

Zero-point correction= 0.396980 Hartree  
Thermal correction to Energy= 0.421554 Hartree  
Thermal correction to Enthalpy= 0.422498 Hartree  
Thermal correction to Gibbs Free Energy= 0.338097 Hartree  
Sum of electronic and zero-point Energies= -937.632434 Hartree  
Sum of electronic and thermal Energies= -937.607860 Hartree  
Sum of electronic and thermal Enthalpies= -937.606916 Hartree  
Sum of electronic and thermal Free Energies= -937.691316 Hartree

| Label | Symbol | X          | Y          | Z          |
|-------|--------|------------|------------|------------|
| 1     | C      | 1.7412510  | 0.0363630  | 0.1572990  |
| 2     | C      | 3.2361810  | -0.0335240 | -0.1833150 |
| 3     | C      | 3.7211660  | -1.4722820 | 0.0157220  |
| 4     | C      | 2.9246930  | -2.4694280 | -0.8334130 |
| 5     | C      | 0.9194330  | -0.9090030 | -0.7135090 |
| 6     | H      | 4.7739510  | -1.5692780 | -0.2455380 |
| 7     | H      | 3.3370430  | 0.1968300  | -1.2529940 |
| 8     | H      | 1.5946300  | -0.2283360 | 1.2091970  |
| 9     | H      | 1.3680400  | 1.0491940  | 0.0260330  |
| 10    | H      | 3.1226550  | -2.2751040 | -1.8937070 |
| 11    | H      | 3.2061790  | -3.5004360 | -0.6235530 |
| 12    | H      | 0.9728920  | -0.5850850 | -1.7570420 |
| 13    | H      | 3.6295850  | -1.7504350 | 1.0696890  |
| 14    | C      | 4.0814070  | 1.0401360  | 0.5601100  |
| 15    | C      | 3.9554940  | 0.9233870  | 2.0823780  |
| 16    | H      | 4.6011770  | 1.6591250  | 2.5661850  |
| 17    | H      | 2.9359590  | 1.1127590  | 2.4226260  |
| 18    | H      | 4.2574690  | -0.0619220 | 2.4421830  |
| 19    | C      | 5.5580920  | 0.8931660  | 0.1727240  |
| 20    | H      | 5.6821620  | 0.8738210  | -0.9132120 |
| 21    | H      | 6.1330070  | 1.7372540  | 0.5581760  |
| 22    | H      | 6.0024820  | -0.0145050 | 0.5825780  |
| 23    | C      | 3.6235630  | 2.4399300  | 0.1299110  |
| 24    | H      | 4.2717610  | 3.1991750  | 0.5717140  |
| 25    | H      | 3.6705350  | 2.5529310  | -0.9561010 |
| 26    | H      | 2.6042360  | 2.6617240  | 0.4489040  |
| 27    | C      | 1.4391340  | -2.3241010 | -0.6282120 |
| 28    | O      | 0.7102420  | -3.2584730 | -0.3955460 |
| 29    | I      | -1.2270100 | -1.0346060 | -0.2336330 |
| 30    | C      | -1.3869270 | 1.0343560  | -0.5084150 |
| 31    | C      | -1.8568470 | 1.5102960  | -1.7199550 |
| 32    | C      | -1.0493780 | 1.8900860  | 0.5267600  |
| 33    | C      | -1.9742620 | 2.8798320  | -1.8989960 |
| 34    | H      | -2.1558960 | 0.8282250  | -2.5035050 |
| 35    | C      | -1.1724680 | 3.2579670  | 0.3338820  |
| 36    | H      | -0.7006990 | 1.5043390  | 1.4750660  |
| 37    | C      | -1.6305740 | 3.7517520  | -0.8772020 |
| 38    | H      | -2.3491170 | 3.2626900  | -2.8390860 |
| 39    | H      | -0.9173840 | 3.9349800  | 1.1387560  |
| 40    | H      | -1.7319390 | 4.8194850  | -1.0213700 |
| 41    | O      | -3.4954610 | -0.7890010 | -0.0147340 |
| 42    | C      | -4.2270490 | -0.4347050 | 1.0009780  |
| 43    | O      | -5.4152090 | -0.2025280 | 0.9203050  |
| 44    | C      | -3.5145790 | -0.3088530 | 2.3454230  |
| 45    | H      | -2.9264910 | -1.2018940 | 2.5667960  |

|    |   |            |            |           |
|----|---|------------|------------|-----------|
| 46 | H | -2.8327450 | 0.5454300  | 2.3226900 |
| 47 | H | -4.2445210 | -0.1490910 | 3.1348680 |

### 2p-OI

Zero-point correction= 0.397213 Hartree  
 Thermal correction to Energy= 0.421389 Hartree  
 Thermal correction to Enthalpy= 0.422333 Hartree  
 Thermal correction to Gibbs Free Energy= 0.339195 Hartree  
 Sum of electronic and zero-point Energies= -937.626731 Hartree  
 Sum of electronic and thermal Energies= -937.602555 Hartree  
 Sum of electronic and thermal Enthalpies= -937.601610 Hartree  
 Sum of electronic and thermal Free Energies= -937.684749 Hartree

| Label | Symbol | X          | Y          | Z          |
|-------|--------|------------|------------|------------|
| 1     | C      | -3.2644720 | -0.1653240 | -1.2867530 |
| 2     | C      | -3.4136630 | -0.3298090 | 0.2286900  |
| 3     | C      | -2.6992160 | -1.6179090 | 0.6433070  |
| 4     | C      | -1.2036570 | -1.5261910 | 0.3648100  |
| 5     | C      | -1.8621320 | -0.4164640 | -1.7570390 |
| 6     | H      | -2.8557810 | -1.8390460 | 1.6998190  |
| 7     | H      | -2.8683890 | 0.5055680  | 0.6890780  |
| 8     | H      | -3.9598210 | -0.8324030 | -1.8111360 |
| 9     | H      | -3.5460000 | 0.8485590  | -1.5803190 |
| 10    | H      | -0.7317130 | -0.8683570 | 1.1053970  |
| 11    | H      | -0.7320240 | -2.5066020 | 0.4763990  |
| 12    | H      | -1.5939550 | -0.0899610 | -2.7555720 |
| 13    | H      | -3.1131690 | -2.4571090 | 0.0769370  |
| 14    | C      | -4.8761080 | -0.2244610 | 0.7406310  |
| 15    | C      | -5.6992140 | -1.4662230 | 0.3836370  |
| 16    | H      | -6.7377780 | -1.3302160 | 0.6939150  |
| 17    | H      | -5.6996940 | -1.6572390 | -0.6913560 |
| 18    | H      | -5.3203900 | -2.3584690 | 0.8848500  |
| 19    | C      | -4.8701780 | -0.0559730 | 2.2648100  |
| 20    | H      | -4.3139030 | 0.8386530  | 2.5557600  |
| 21    | H      | -5.8906600 | 0.0478310  | 2.6404850  |
| 22    | H      | -4.4222440 | -0.9116150 | 2.7719850  |
| 23    | C      | -5.5545590 | 1.0109370  | 0.1377620  |
| 24    | H      | -6.5285340 | 1.1729450  | 0.6048750  |
| 25    | H      | -4.9519760 | 1.9087440  | 0.2998390  |
| 26    | H      | -5.7189790 | 0.9025060  | -0.9352040 |
| 27    | C      | -0.9280840 | -1.0104010 | -1.0188480 |
| 28    | O      | 0.3183080  | -1.2019600 | -1.5277860 |
| 29    | I      | 1.9818000  | -0.6692190 | -0.4327910 |
| 30    | C      | 1.1780910  | 1.2632420  | -0.2575870 |
| 31    | C      | 0.6352790  | 1.8443070  | -1.3878260 |
| 32    | C      | 1.1413340  | 1.8825990  | 0.9787070  |
| 33    | C      | 0.0420760  | 3.0925420  | -1.2729540 |
| 34    | H      | 0.6548740  | 1.3271650  | -2.3367770 |
| 35    | C      | 0.5469910  | 3.1308870  | 1.0764690  |
| 36    | H      | 1.5793660  | 1.4118690  | 1.8471940  |
| 37    | C      | -0.0016350 | 3.7341640  | -0.0456560 |
| 38    | H      | -0.3873990 | 3.5598150  | -2.1494150 |
| 39    | H      | 0.5131940  | 3.6304200  | 2.0359330  |
| 40    | H      | -0.4667780 | 4.7078960  | 0.0384440  |
| 41    | O      | 3.6115350  | 0.2588240  | 0.6451650  |
| 42    | C      | 4.5532140  | -0.6162020 | 0.8934840  |
| 43    | O      | 4.4837740  | -1.7810950 | 0.5495190  |

|    |   |           |            |           |
|----|---|-----------|------------|-----------|
| 44 | C | 5.7289830 | -0.0424290 | 1.6423450 |
| 45 | H | 6.1669830 | 0.7721030  | 1.0649040 |
| 46 | H | 5.3917860 | 0.3732180  | 2.5923420 |
| 47 | H | 6.4703680 | -0.8175620 | 1.8164220 |

---

**2p-AxAx**

Zero-point correction= 0.398045 Hartree  
 Thermal correction to Energy= 0.422199 Hartree  
 Thermal correction to Enthalpy= 0.423143 Hartree  
 Thermal correction to Gibbs Free Energy= 0.341078 Hartree  
 Sum of electronic and zero-point Energies= -937.634553 Hartree  
 Sum of electronic and thermal Energies= -937.610399 Hartree  
 Sum of electronic and thermal Enthalpies= -937.609455 Hartree  
 Sum of electronic and thermal Free Energies= -937.691520 Hartree

| Label | Symbol | X          | Y          | Z          |
|-------|--------|------------|------------|------------|
| 1     | C      | 1.8038700  | -1.4137470 | -0.5343220 |
| 2     | C      | 2.9884450  | -0.8504720 | 0.2807950  |
| 3     | C      | 3.8360640  | 0.0543770  | -0.6263930 |
| 4     | C      | 3.0487460  | 1.1269120  | -1.3840340 |
| 5     | H      | 4.6325530  | 0.5345340  | -0.0560190 |
| 6     | H      | 2.2343310  | -2.1809770 | -1.1873300 |
| 7     | H      | 1.1044170  | -1.9538820 | 0.1042650  |
| 8     | H      | 2.6449260  | 1.8691990  | -0.6895040 |
| 9     | H      | 3.6853850  | 1.6651060  | -2.0854940 |
| 10    | H      | 4.3374090  | -0.5785350 | -1.3647900 |
| 11    | C      | 1.8739860  | 0.5816360  | -2.1534560 |
| 12    | O      | 1.5760610  | 0.9878330  | -3.2517730 |
| 13    | C      | 1.0463360  | -0.4758380 | -1.4725600 |
| 14    | H      | 0.5563930  | -1.0423360 | -2.2611910 |
| 15    | I      | -0.6864090 | 0.5993930  | -0.5558560 |
| 16    | C      | -1.5950430 | -1.2672030 | -0.2283570 |
| 17    | C      | -1.9280760 | -1.6264320 | 1.0648670  |
| 18    | C      | -1.8455980 | -2.0987650 | -1.3044600 |
| 19    | C      | -2.5070330 | -2.8669110 | 1.2826510  |
| 20    | H      | -1.7638490 | -0.9439230 | 1.8860280  |
| 21    | C      | -2.4247500 | -3.3374250 | -1.0716140 |
| 22    | H      | -1.6099230 | -1.7933200 | -2.3151040 |
| 23    | C      | -2.7498310 | -3.7228820 | 0.2192910  |
| 24    | H      | -2.7723820 | -3.1595290 | 2.2901350  |
| 25    | H      | -2.6292190 | -3.9948820 | -1.9064980 |
| 26    | H      | -3.2029800 | -4.6896760 | 0.3961630  |
| 27    | O      | -2.6609190 | 1.2360930  | 0.5018560  |
| 28    | C      | -2.5903560 | 2.5030920  | 0.7456910  |
| 29    | C      | -3.8133230 | 3.0828640  | 1.4249980  |
| 30    | H      | -4.6744820 | 2.9788730  | 0.7633750  |
| 31    | H      | -4.0321850 | 2.5239120  | 2.3353530  |
| 32    | H      | -3.6531200 | 4.1328230  | 1.6578710  |
| 33    | O      | -1.6261420 | 3.2037710  | 0.4556500  |
| 34    | H      | 3.6013920  | -1.7371050 | 0.4698800  |
| 35    | C      | 2.7351990  | -0.2941030 | 1.7225620  |
| 36    | C      | 2.3729700  | 1.1923240  | 1.7975030  |
| 37    | H      | 1.4641220  | 1.4373610  | 1.2501940  |
| 38    | H      | 2.1992640  | 1.4721700  | 2.8386700  |
| 39    | H      | 3.1822290  | 1.8242470  | 1.4279530  |
| 40    | C      | 4.0363370  | -0.4888890 | 2.5174990  |
| 41    | H      | 4.2873980  | -1.5484070 | 2.6072920  |
| 42    | H      | 4.8807170  | 0.0181860  | 2.0466110  |

|    |   |           |            |           |
|----|---|-----------|------------|-----------|
| 43 | H | 3.9317360 | -0.0825650 | 3.5255010 |
| 44 | C | 1.6413780 | -1.1022170 | 2.4253010 |
| 45 | H | 1.6011910 | -0.8353800 | 3.4832620 |
| 46 | H | 0.6554270 | -0.9065790 | 2.0027540 |
| 47 | H | 1.8309900 | -2.1766650 | 2.3593600 |

## Reference:

- R. K. Harris, E. D. Becker, S. M. Cabral de Menezes, R. Goodfellow and P. Granger, *Magn. Reson. Chem.*, 2002, **40**, 489–505.
- C. T. Sabot, C.; Kumar, K. A.; Antheaume, C.; Mioskowski, *J. Org. Chem.*, 2007, **72**, 5001–5004.
- B. Srinivas, B. T. V.; Supriya, P.; Rohithrao, V.; Naidu, N. V. S.; Sreedhar, *ChemistrySelect*, 2017, **2**, 2600–2604.
- M. Chen, W. Zhang, Z. H. Ren, W. Y. Gao, Y. Y. Wang and Z. H. Guan, *Sci. China Chem.*, 2017, **60**, 761–768.
- A. O. Bityukov, O. V.; Matveeva, O. K.; Vil, V. A.; Kokorekin, V. A.; Nikishin, G. I.; Terent'Ev, *J. Org. Chem.*, 2019, **84**, 1448–1460.
- W. H. Stetter, H.; Mohrmann, K.; Schlenker, *Chem. Ber.*, 1981, **596**, 581–596.
- R. W. Singh, M.; Murray, *J. Org. Chem.*, 1992, **57**, 4263–4270.
- J. Hoffman, J.; Sarafidis, A.; Voss, *Electrochim. Acta*, 1991, **36**, 1165–1169.
- R. Griesbaum, K.; Greinert, *Chem. Ber.*, 1990, **123**, 391–397.
- I. M. Tanyeli, C.; Turkut, E.; Akhmedov, *Tetrahedron Asymmetry*, 2004, **15**, 1729–1733.
- H. D. Rubottom, G. M.; Mott, R. C.; Juve, *J. Org. Chem.*, 1981, **46**, 2717–2721.
- J. May, G.; Pinhey, *Aust. J. Chem.*, 1982, **35**, 1859–1871.
- P. R. Müller, C. E.; Zell, D.; Schreiner, *Chem. - A Eur. J.*, 2009, **15**, 9647–9650.
- A. W. Laukhtien, G.; Volk, F. J.; Frahm, *Tetrahedron Asymmetry*, 1997, **8**, 3457–3466.
- E. W. Dave, V.; Warnhoff, *J. Org. Chem.*, 1983, **48**, 2590–2598.
- T. J. Kuehne, M. E.; Giacobbe, *J. Org. Chem.*, 1968, **33**, 3359–3369.
- J. Tan, W. Zhu, W. Xu, Y. Jing, Z. Ke, Y. Liu and K. Maruoka, *Front. Chem.*, 2020, **8**, 467.
- J. R. Fristad, W. E.; Peterson, *J. Org. Chem.*, 1985, **50**, 10–18.
- S. Dayan, S.; Bareket, Y.; Rozen, *Tetrahedron*, 1999, **55**, 3657–3664.
- D. C. Lex, T. R.; Swasy, M. I.; Whitehead, *J. Org. Chem.*, 2015, **80**, 12234–12243.
- V. V. Yoshimura, A.; Zhdankin, *Arkivoc*, 2017, **2017**, 99–116.
- E. V. Anslyn and D. A. Dougherty, *Modern physical organic chemistry*, University Science Books, USA, 2006.
- J. Da Chai and M. Head-Gordon, *Phys. Chem. Chem. Phys.*, 2008, **10**, 6615–6620.
- F. Weigend and R. Ahlrichs, *Phys. Chem. Chem. Phys.*, 2005, **7**, 3297–3305.
- W. R. Wadt and P. J. Hay, *J. Chem. Phys.*, 1985, **82**, 284–298.
- C. E. Check, T. O. Faust, J. M. Bailey, B. J. Wright, T. M. Gilbert and L. S. Sunderlin, *J. Phys. Chem. A*, 2001, **105**, 8111–8116.
- F. Mocchi, G. Uccheddu, A. Frangia and G. Cerioni, *J. Org. Chem.*, 2007, **72**, 4163–4168.
- a) K. A. Peterson, D. Figgen, E. Goll, H. Stoll and M. Dolg, *J. Chem. Phys.*, 2003, **119**, 11113–11123. b) E. Reed, R. B. Weinstock and F. Weinhold., *J. Chem. Phys.* 1985, **83**, 735–746. c) E. Reed, L. A. Curtiss and F. Weinhold., *Chem. Rev.* 1988, **88**, 6, 899–926.
- B. P. Pritchard, D. Altarawy, B. Didier, T. D. Gibson and T. L. Windus, *J. Chem. Inf. Model.*, 2019, **59**, 4814–4820.
- M. J. Frisch, G. W. Trucks, H. B. Schlegel, G. E. Scuseria, M. A. Robb, J. R. Cheeseman, G. Scalmani, V. Barone, B. Mennucci, G. A. Petersson, H. Nakatsuji, M. Caricato, X. Li, H. P. Hratchian, A. F. Izmaylov, J. Bloino, G. Zheng, J. L. Sonnenberg, M. Hada, M. Ehara, K. Toyota, R. Fukuda, J. Hasegawa, M. Ishida, T. Nakajima, Y. Honda, O. Kitao, H. Nakai, T. Vreven, J. A. Montgomery, Jr., J. E. Peralta, F. Ogliaro, M. Bearpark, J. J. Heyd, E. Brothers, K. N. Kudin, V. N. Staroverov, R. Kobayashi, J. Normand, K. Raghavachari, A. Rendell, J. C. Burant, S. S. Iyengar, J. Tomasi, M. Cossi, N. Rega, J. M. Millam, M. Klene, J. E. Knox, J. B. Cross, V. Bakken, C. Adamo, J. Jaramillo, R. Gomperts, R. E. Stratmann, O. Yazyev, A. J. Austin, R. Cammi, C. Pomelli, J. W. Ochterski, R. L. Martin, K. Morokuma, V. G. Zakrzewski, G. A. Voth, P. Salvador, J. J. Dannenberg, S. Dapprich, A. D. Daniels, Ö. Farkas, J. B. Foresman, J. V. Ortiz, J. Cioslowski, and D. J. Fox, Gaussian 09 (Gaussian, Inc., Wallingford CT, 2009).





## IR and NMR spectra

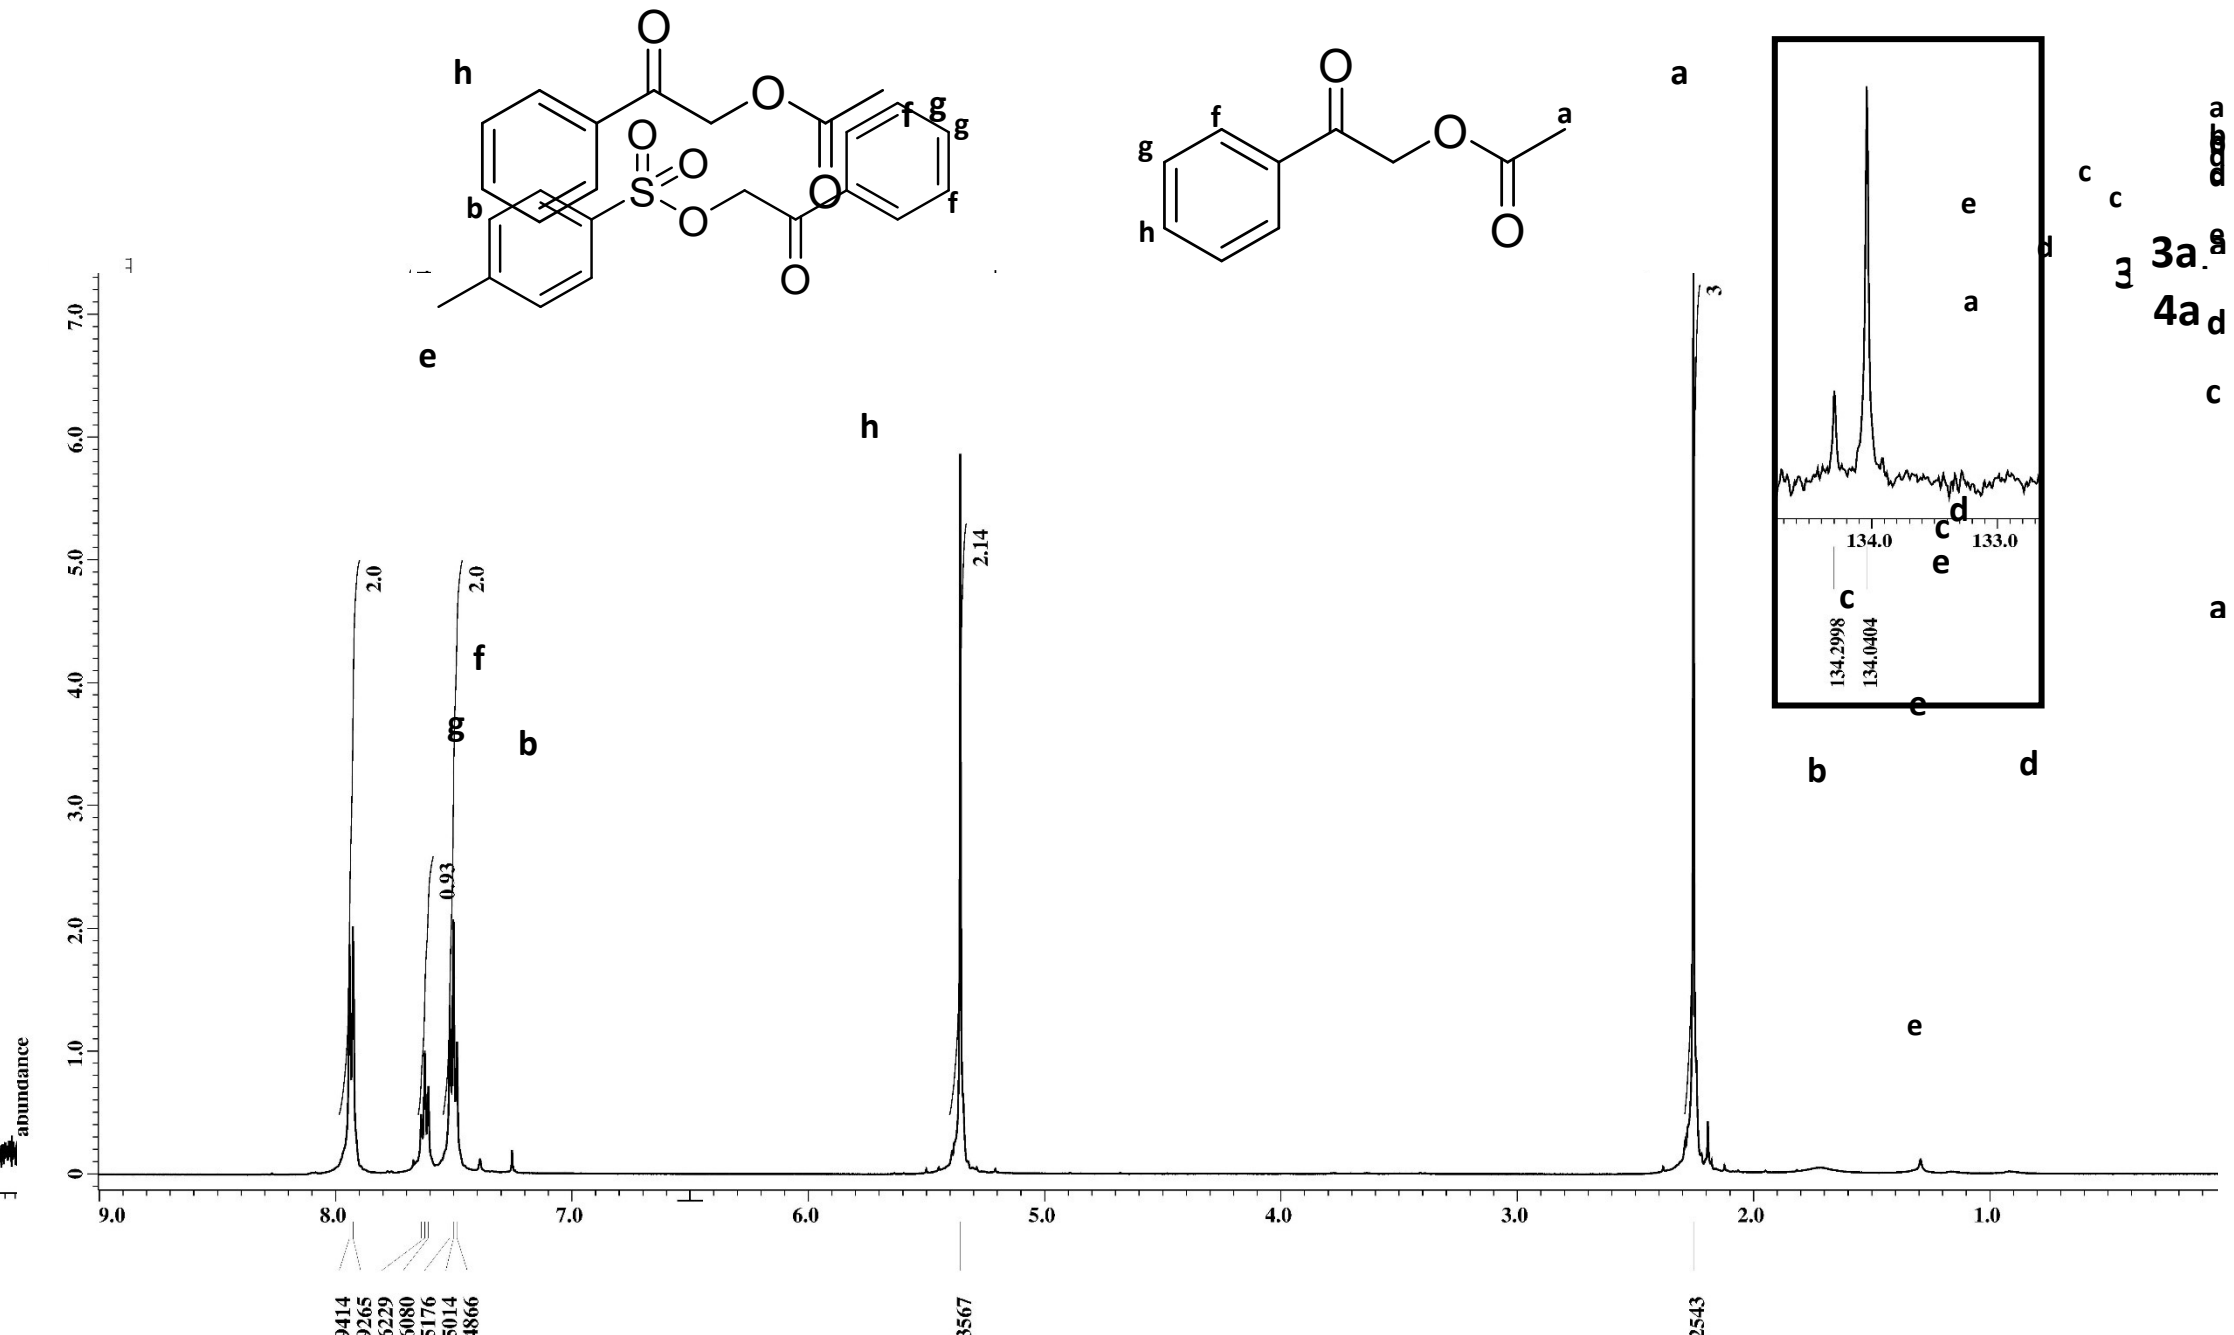

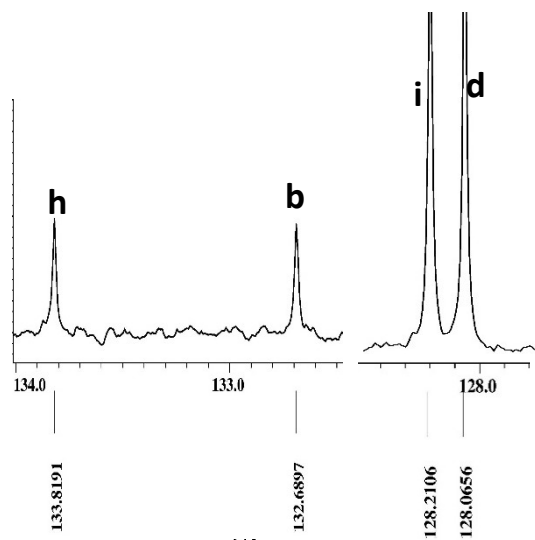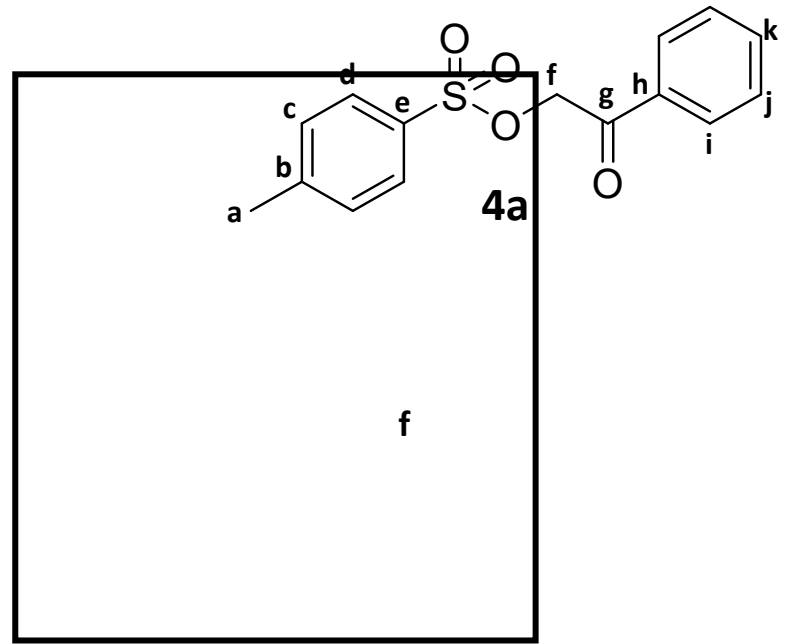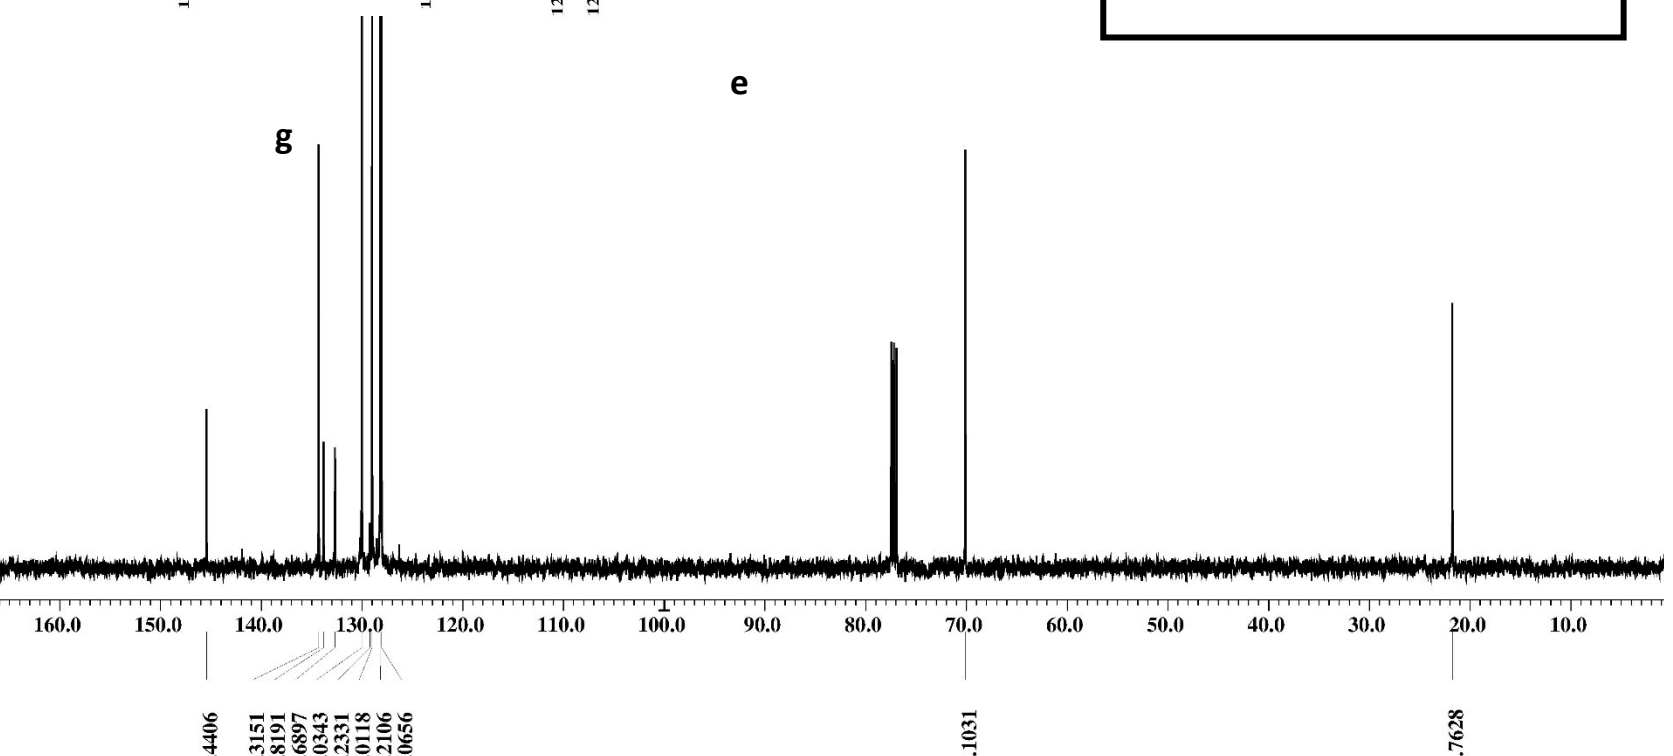

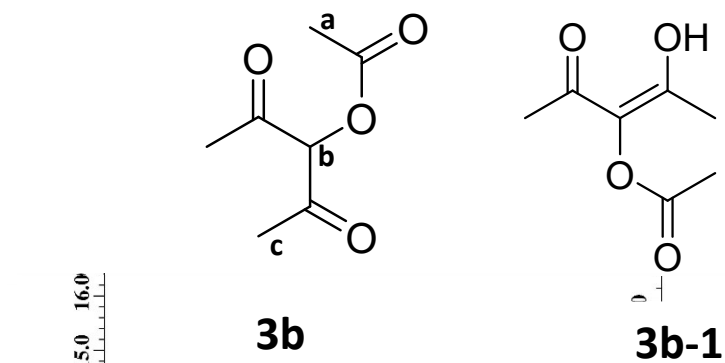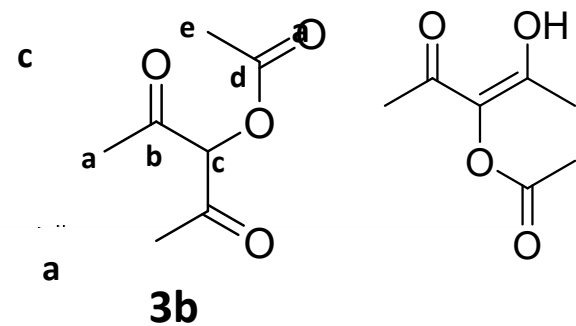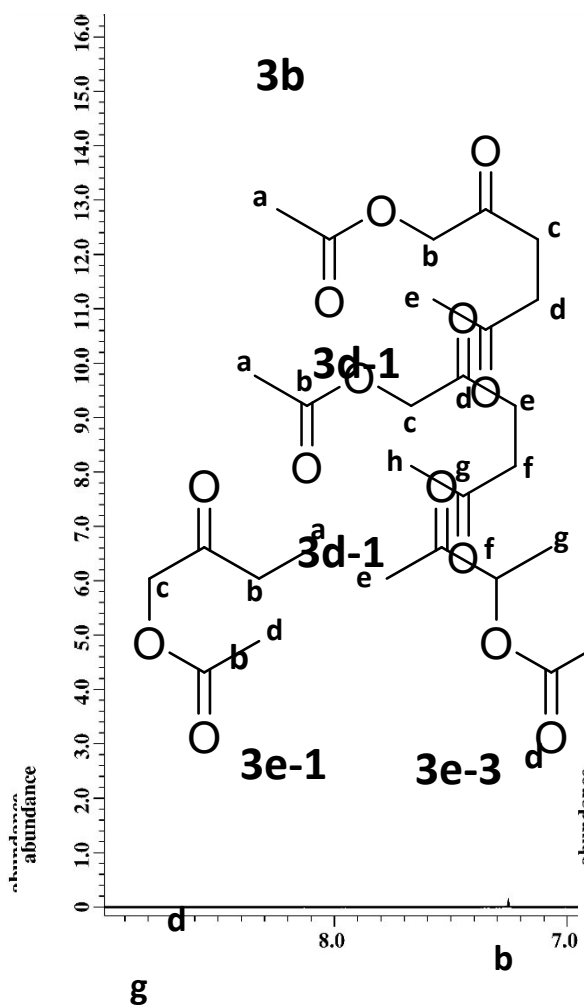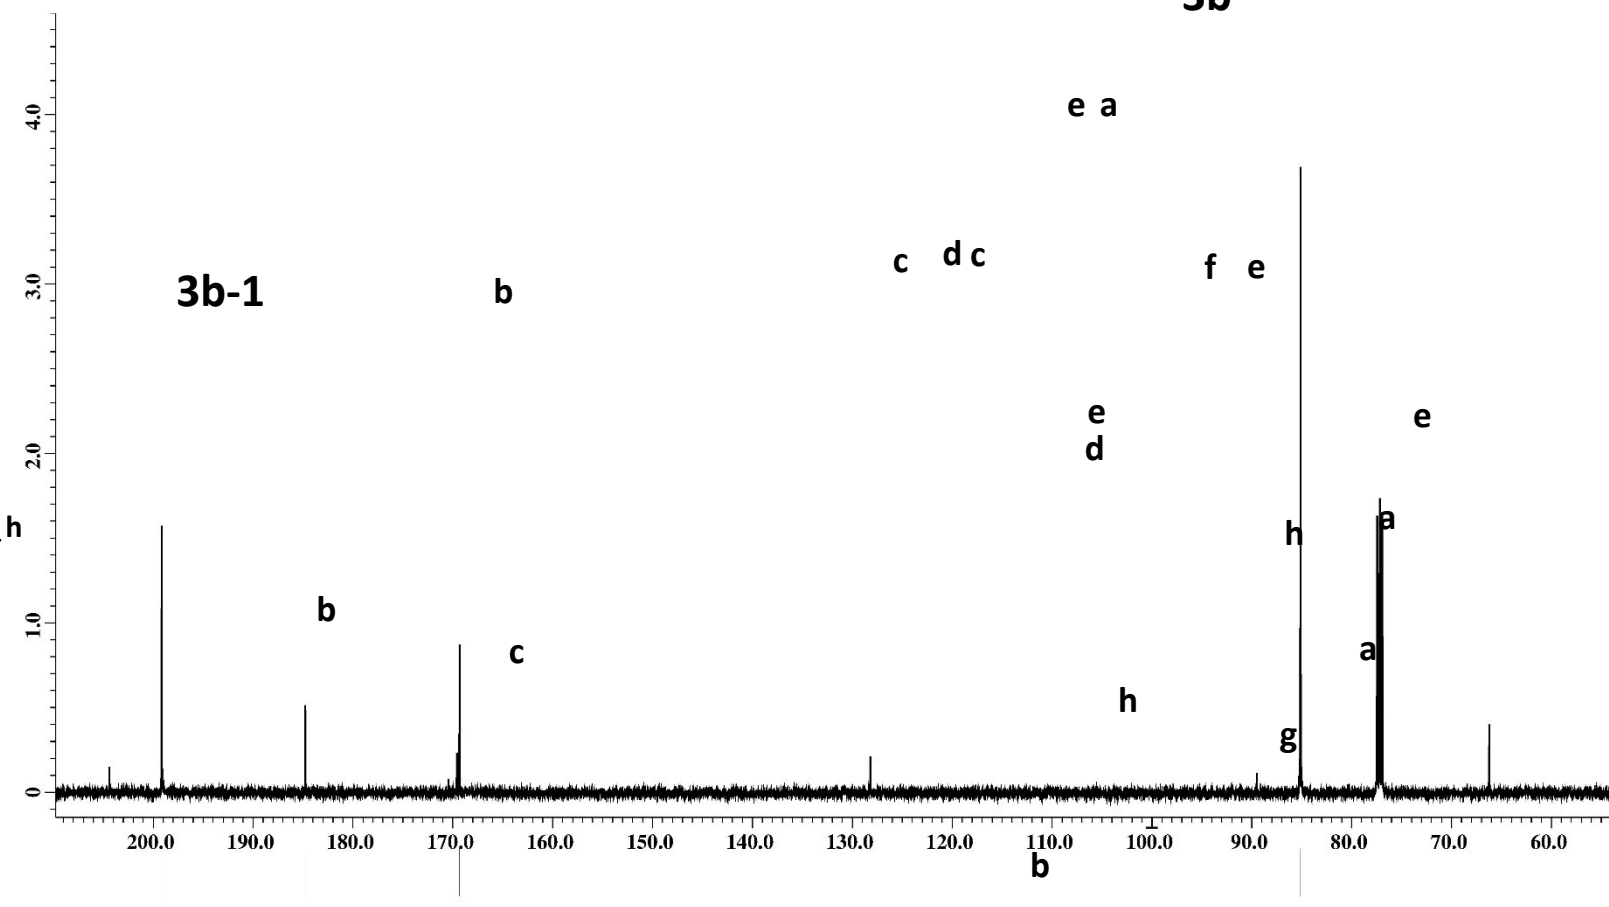

9.1452 4.7766 f 9.3246 b 15.1202

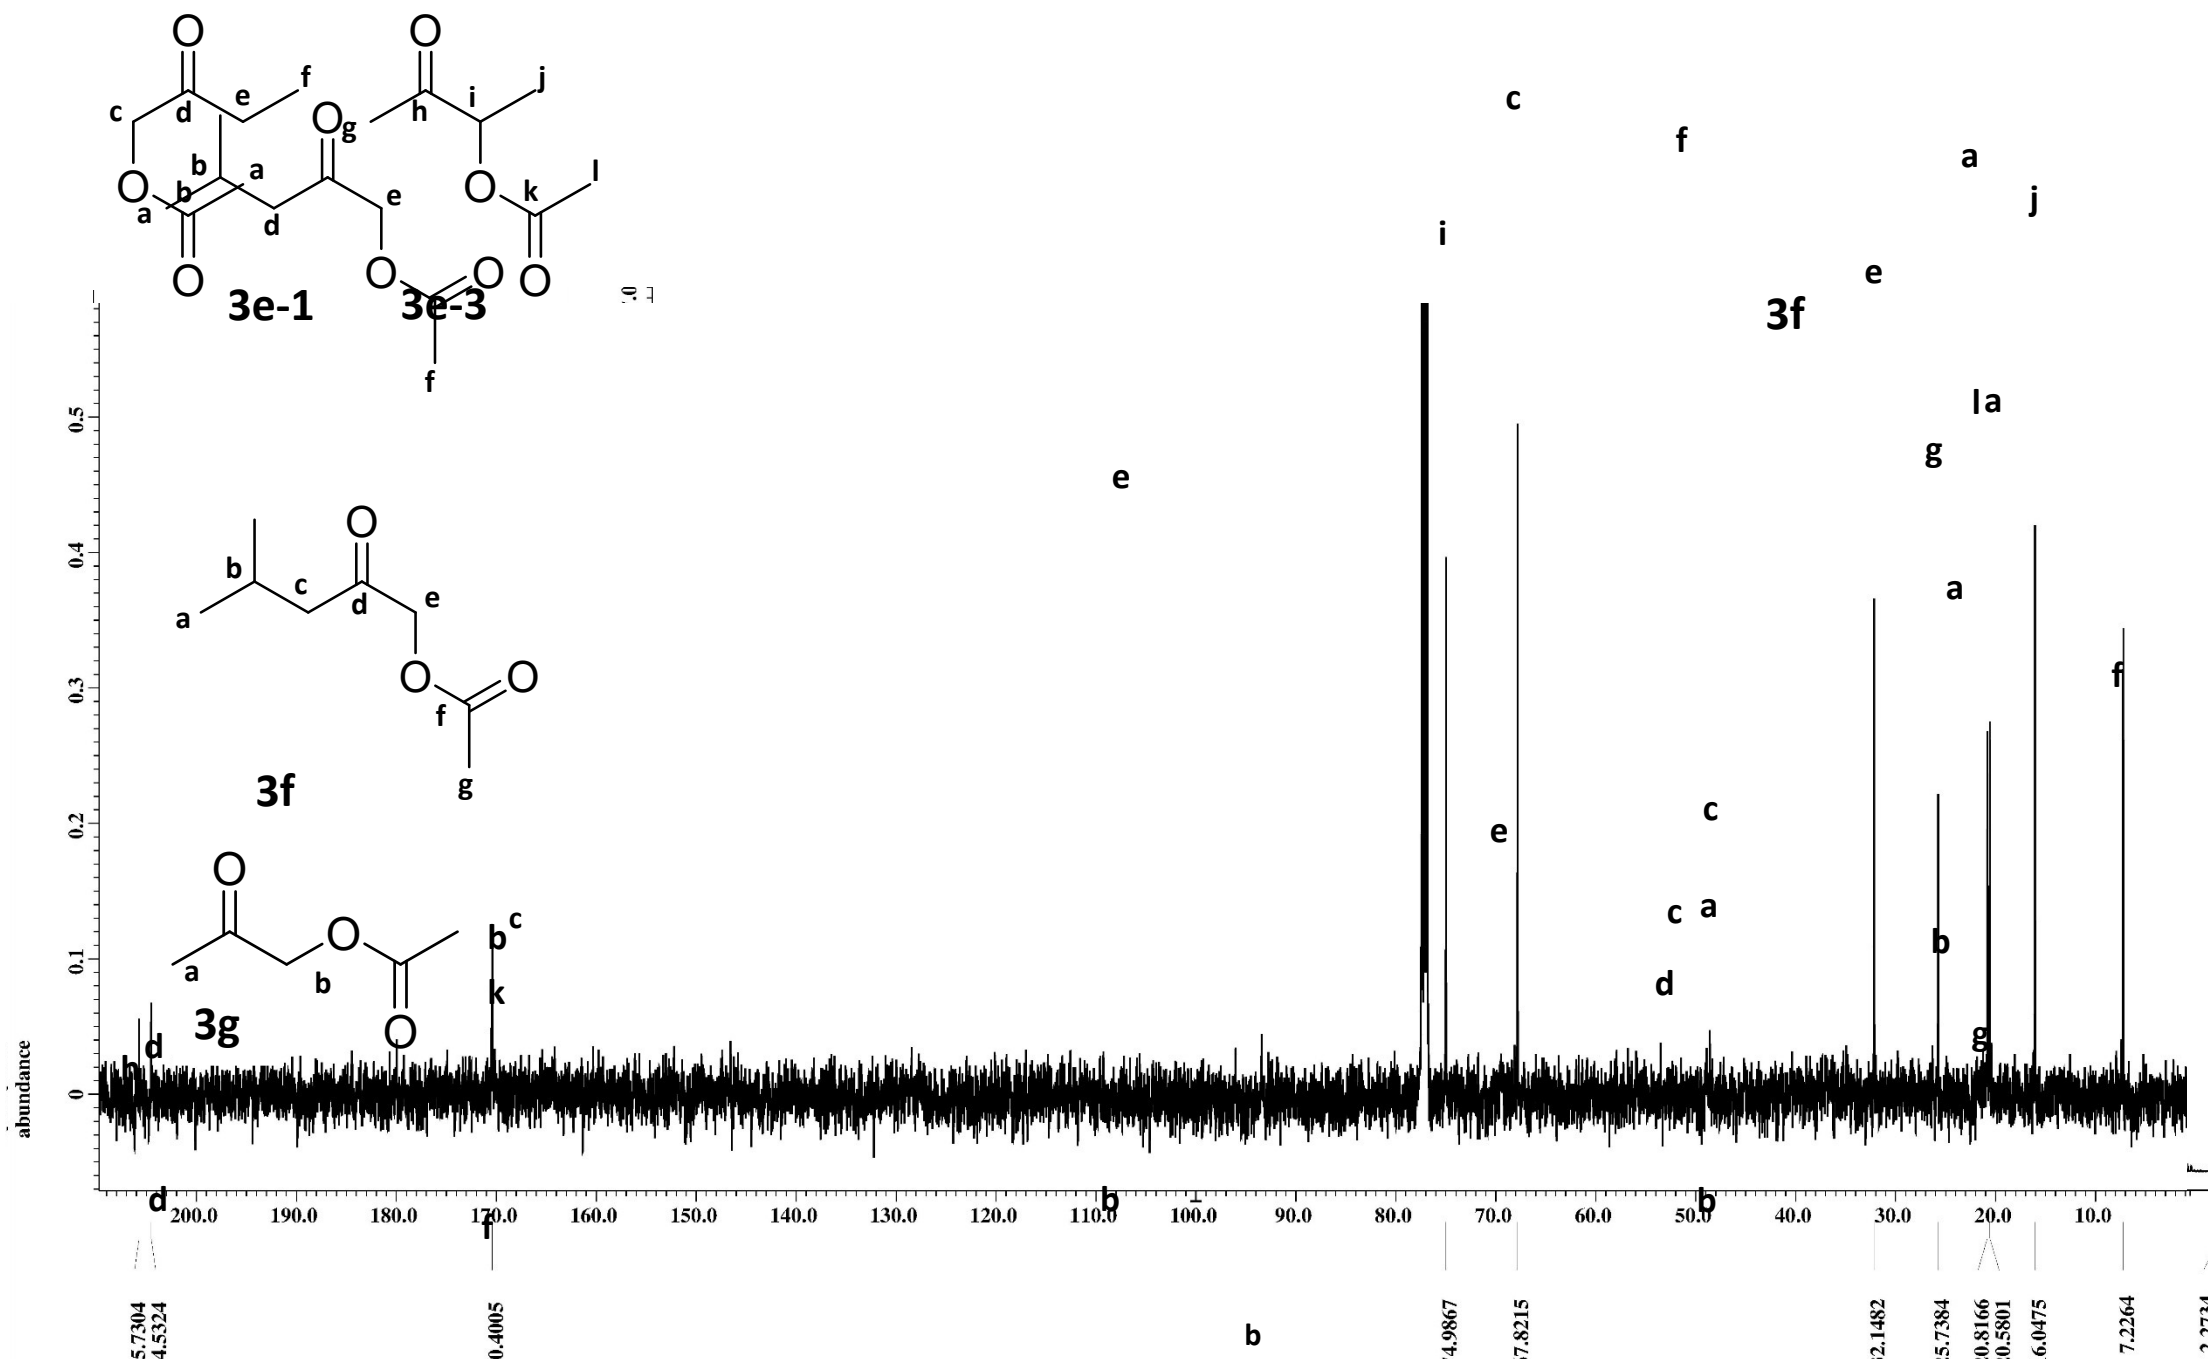

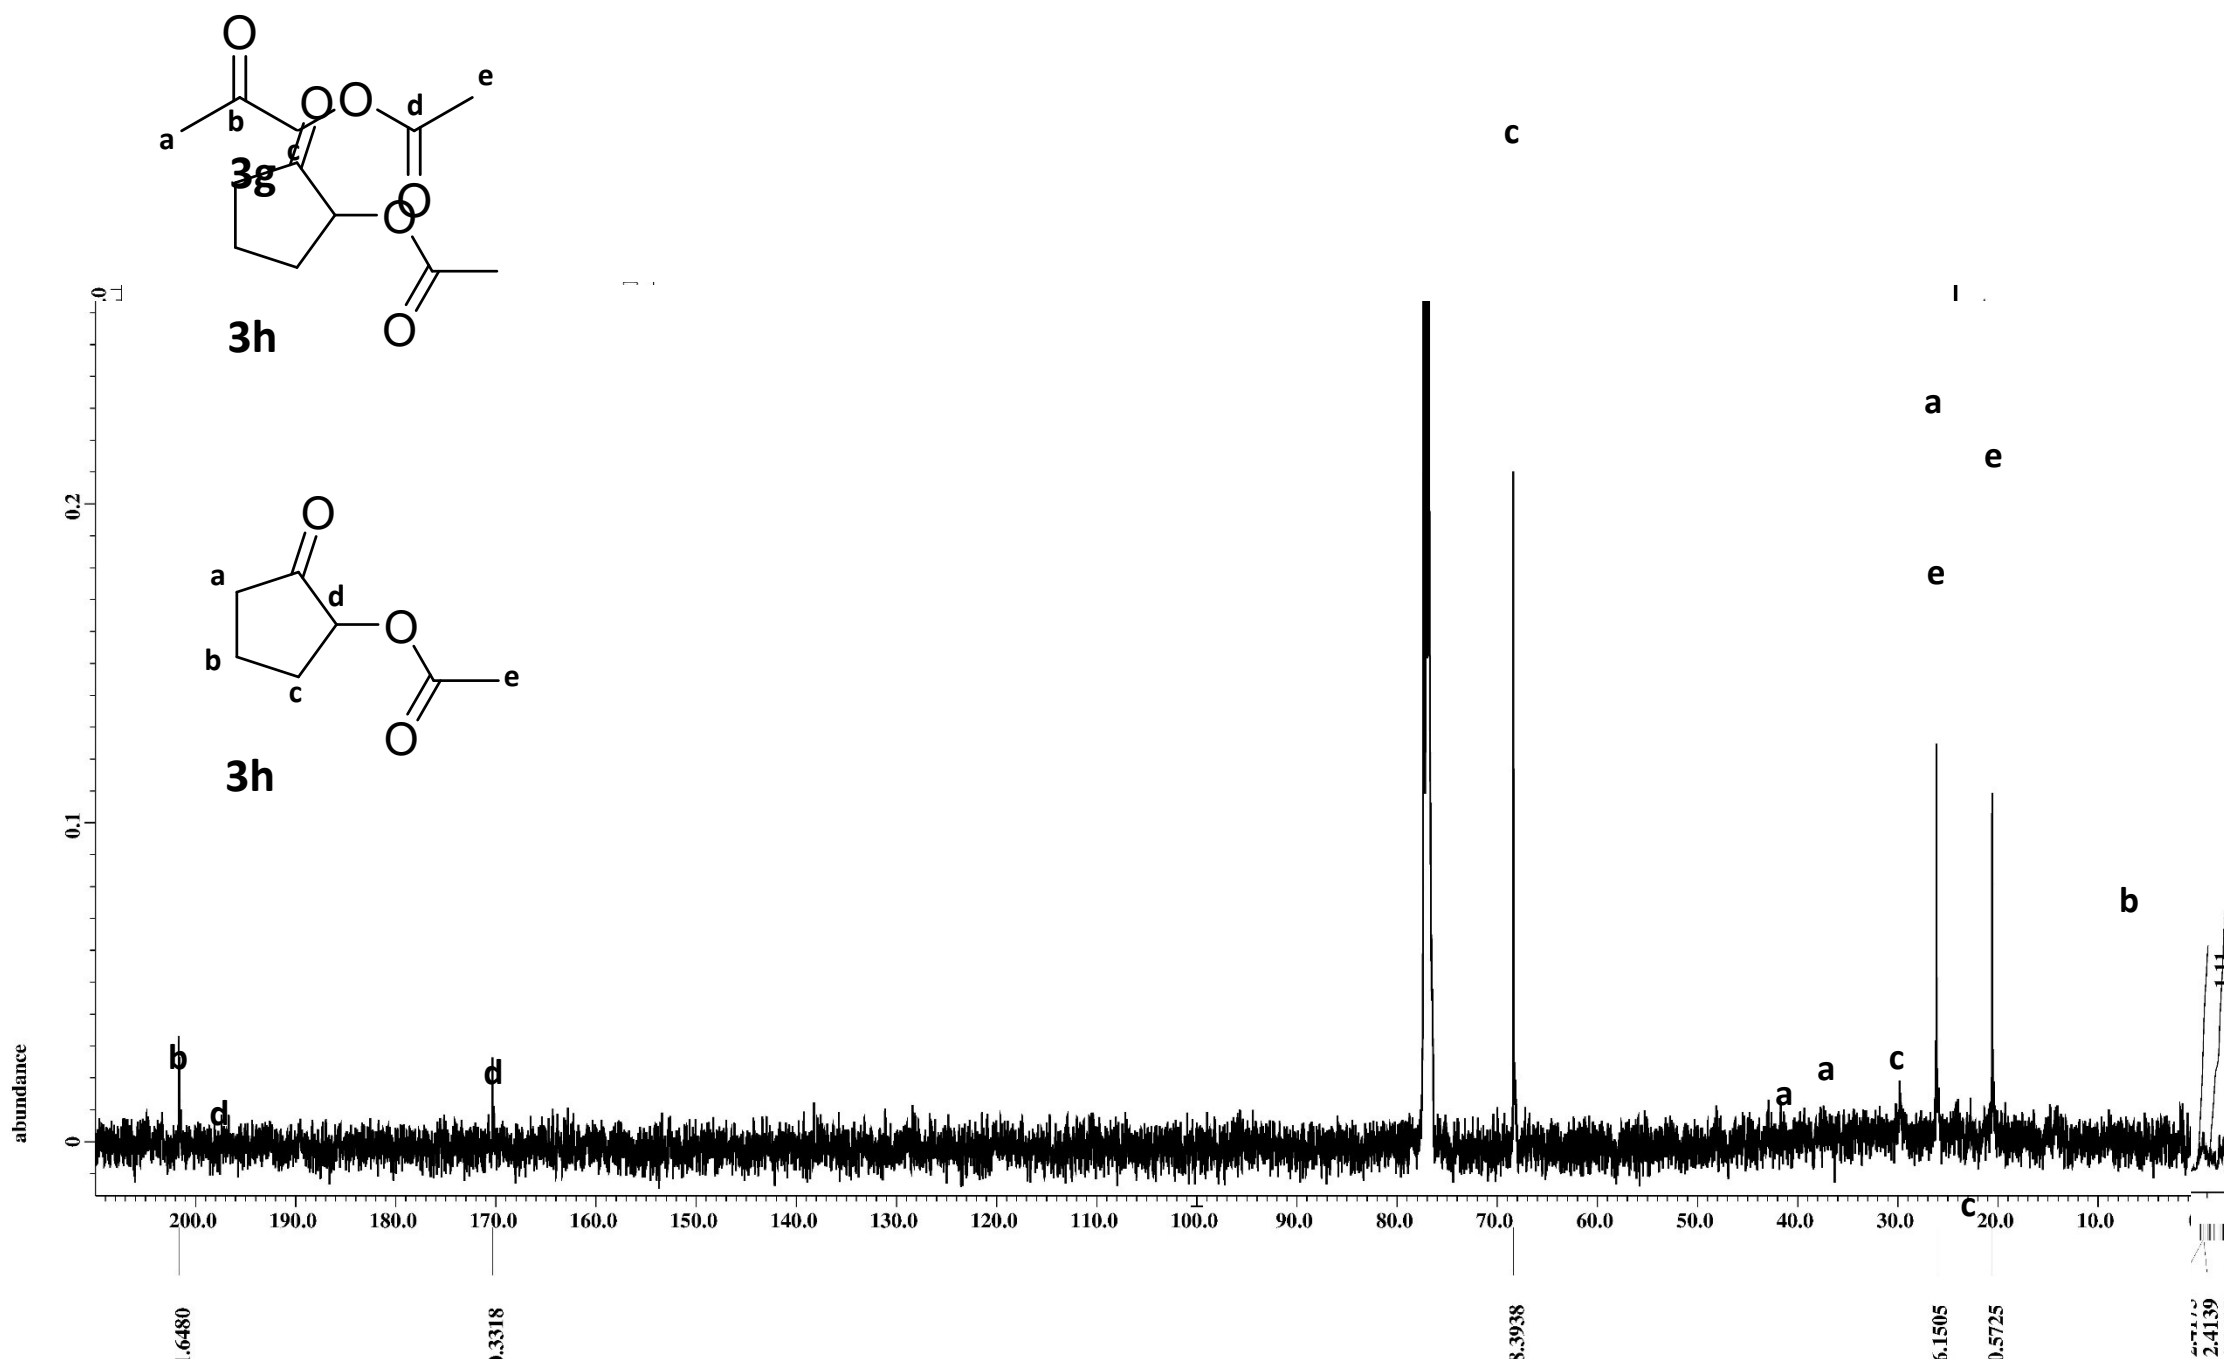

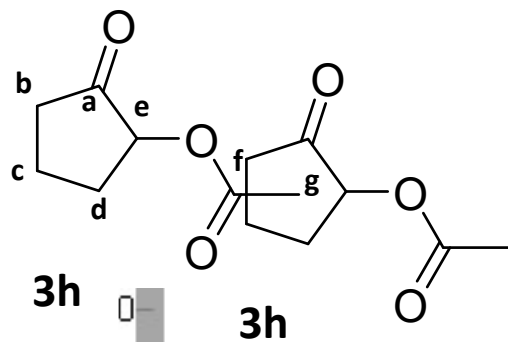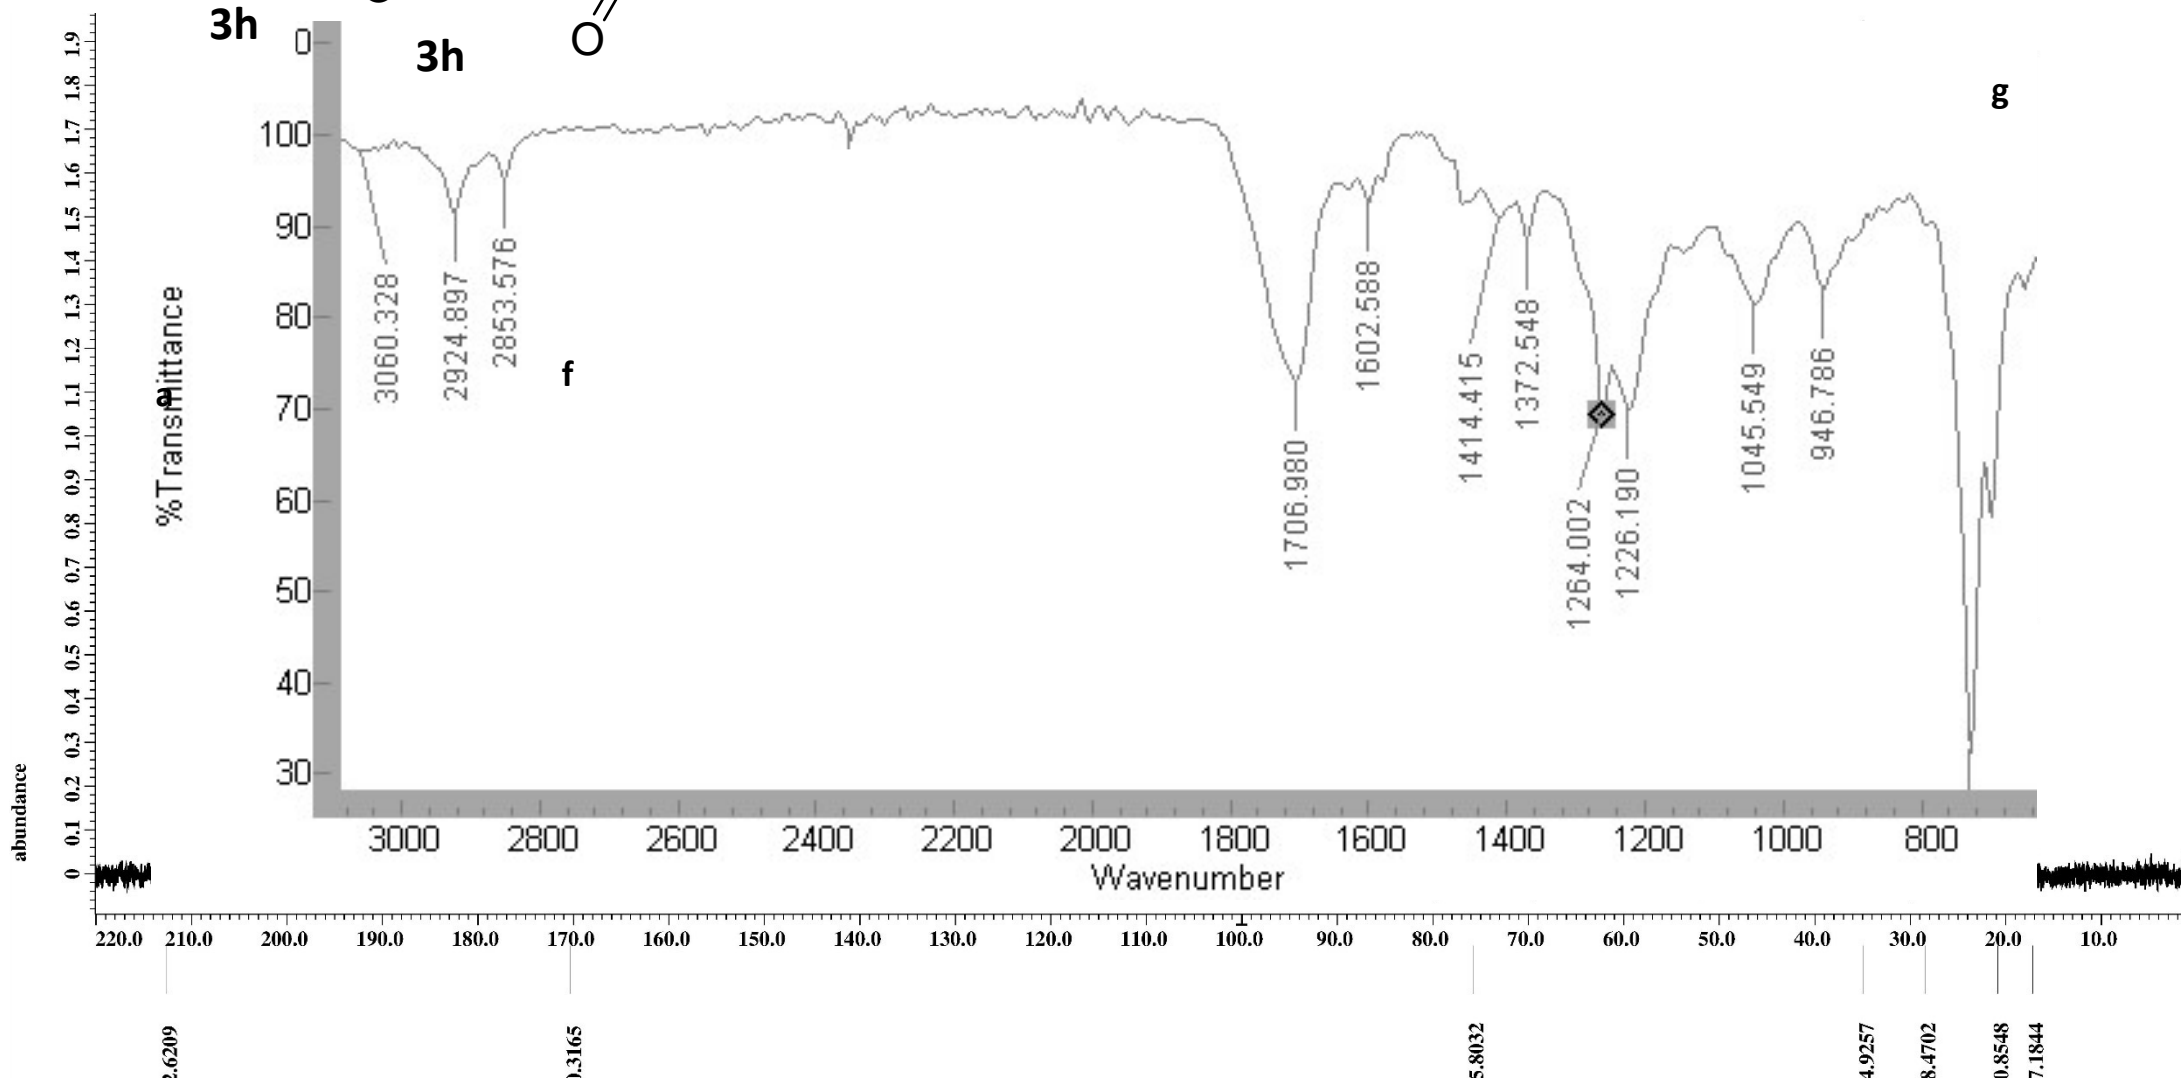

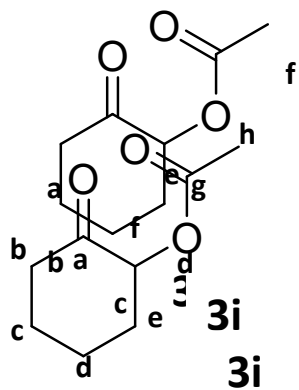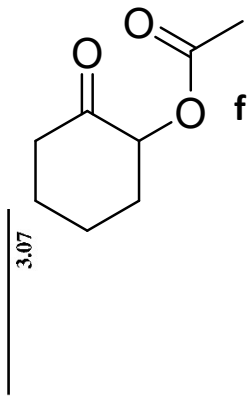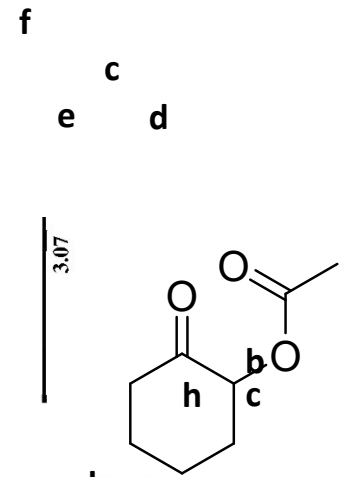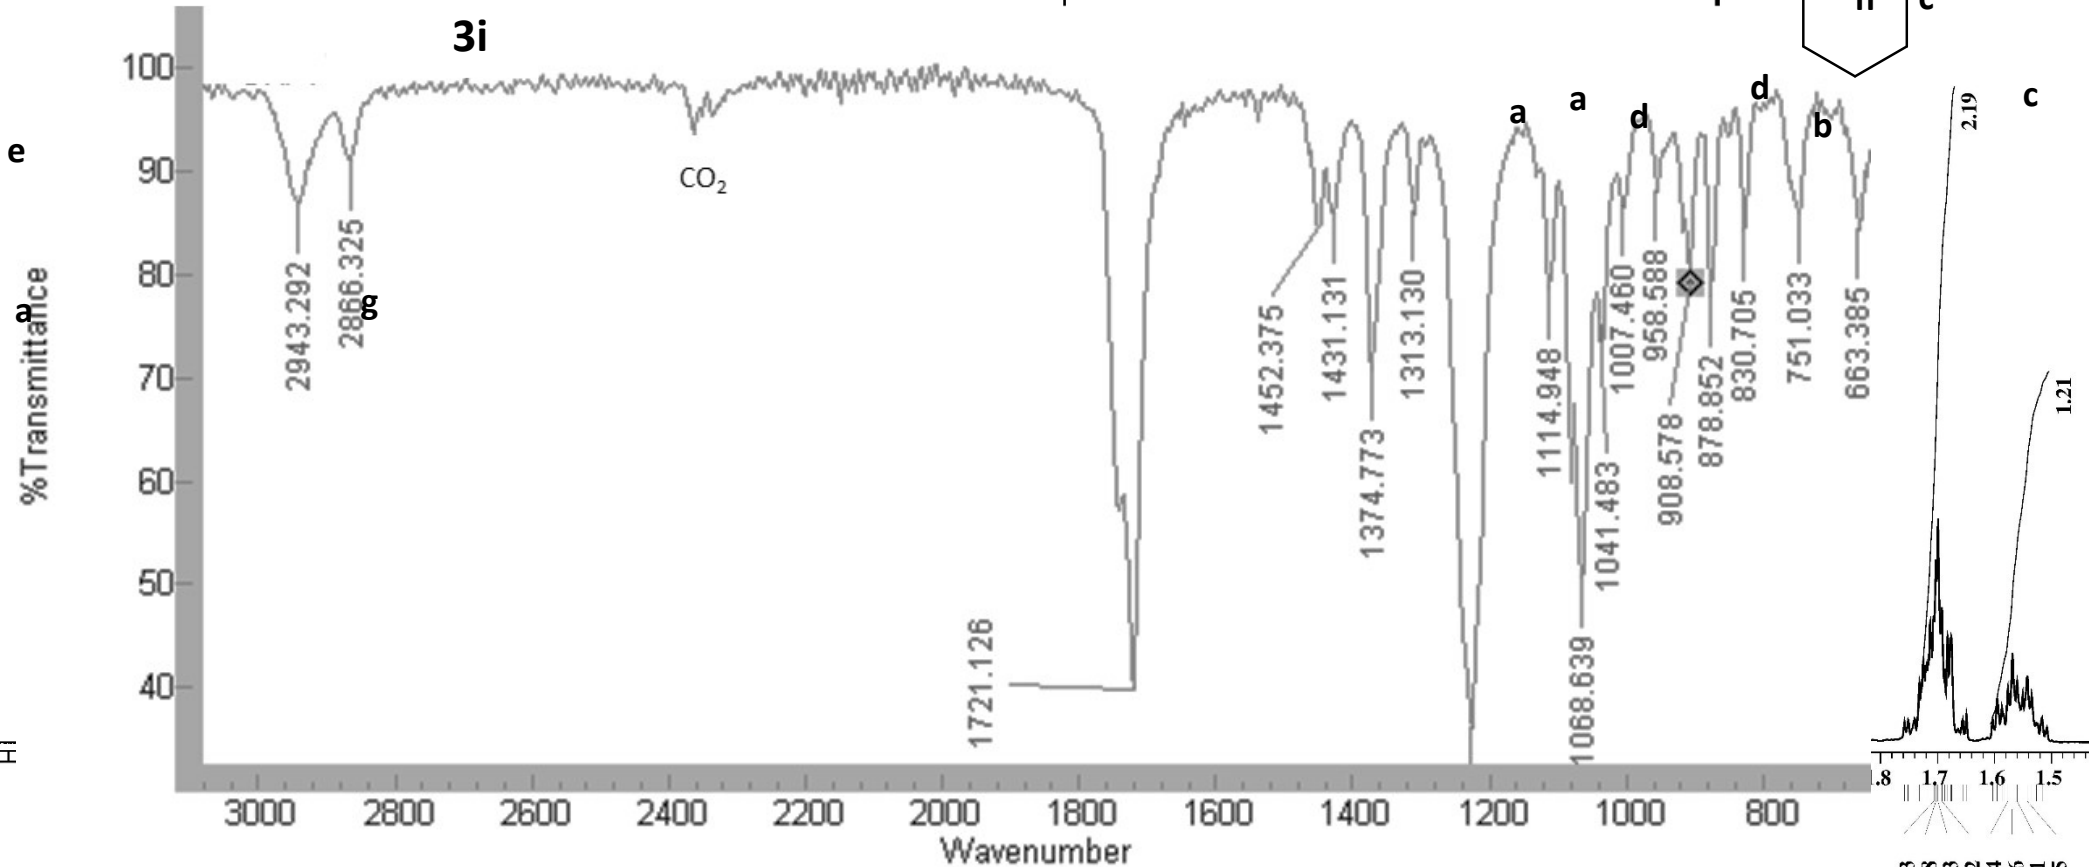



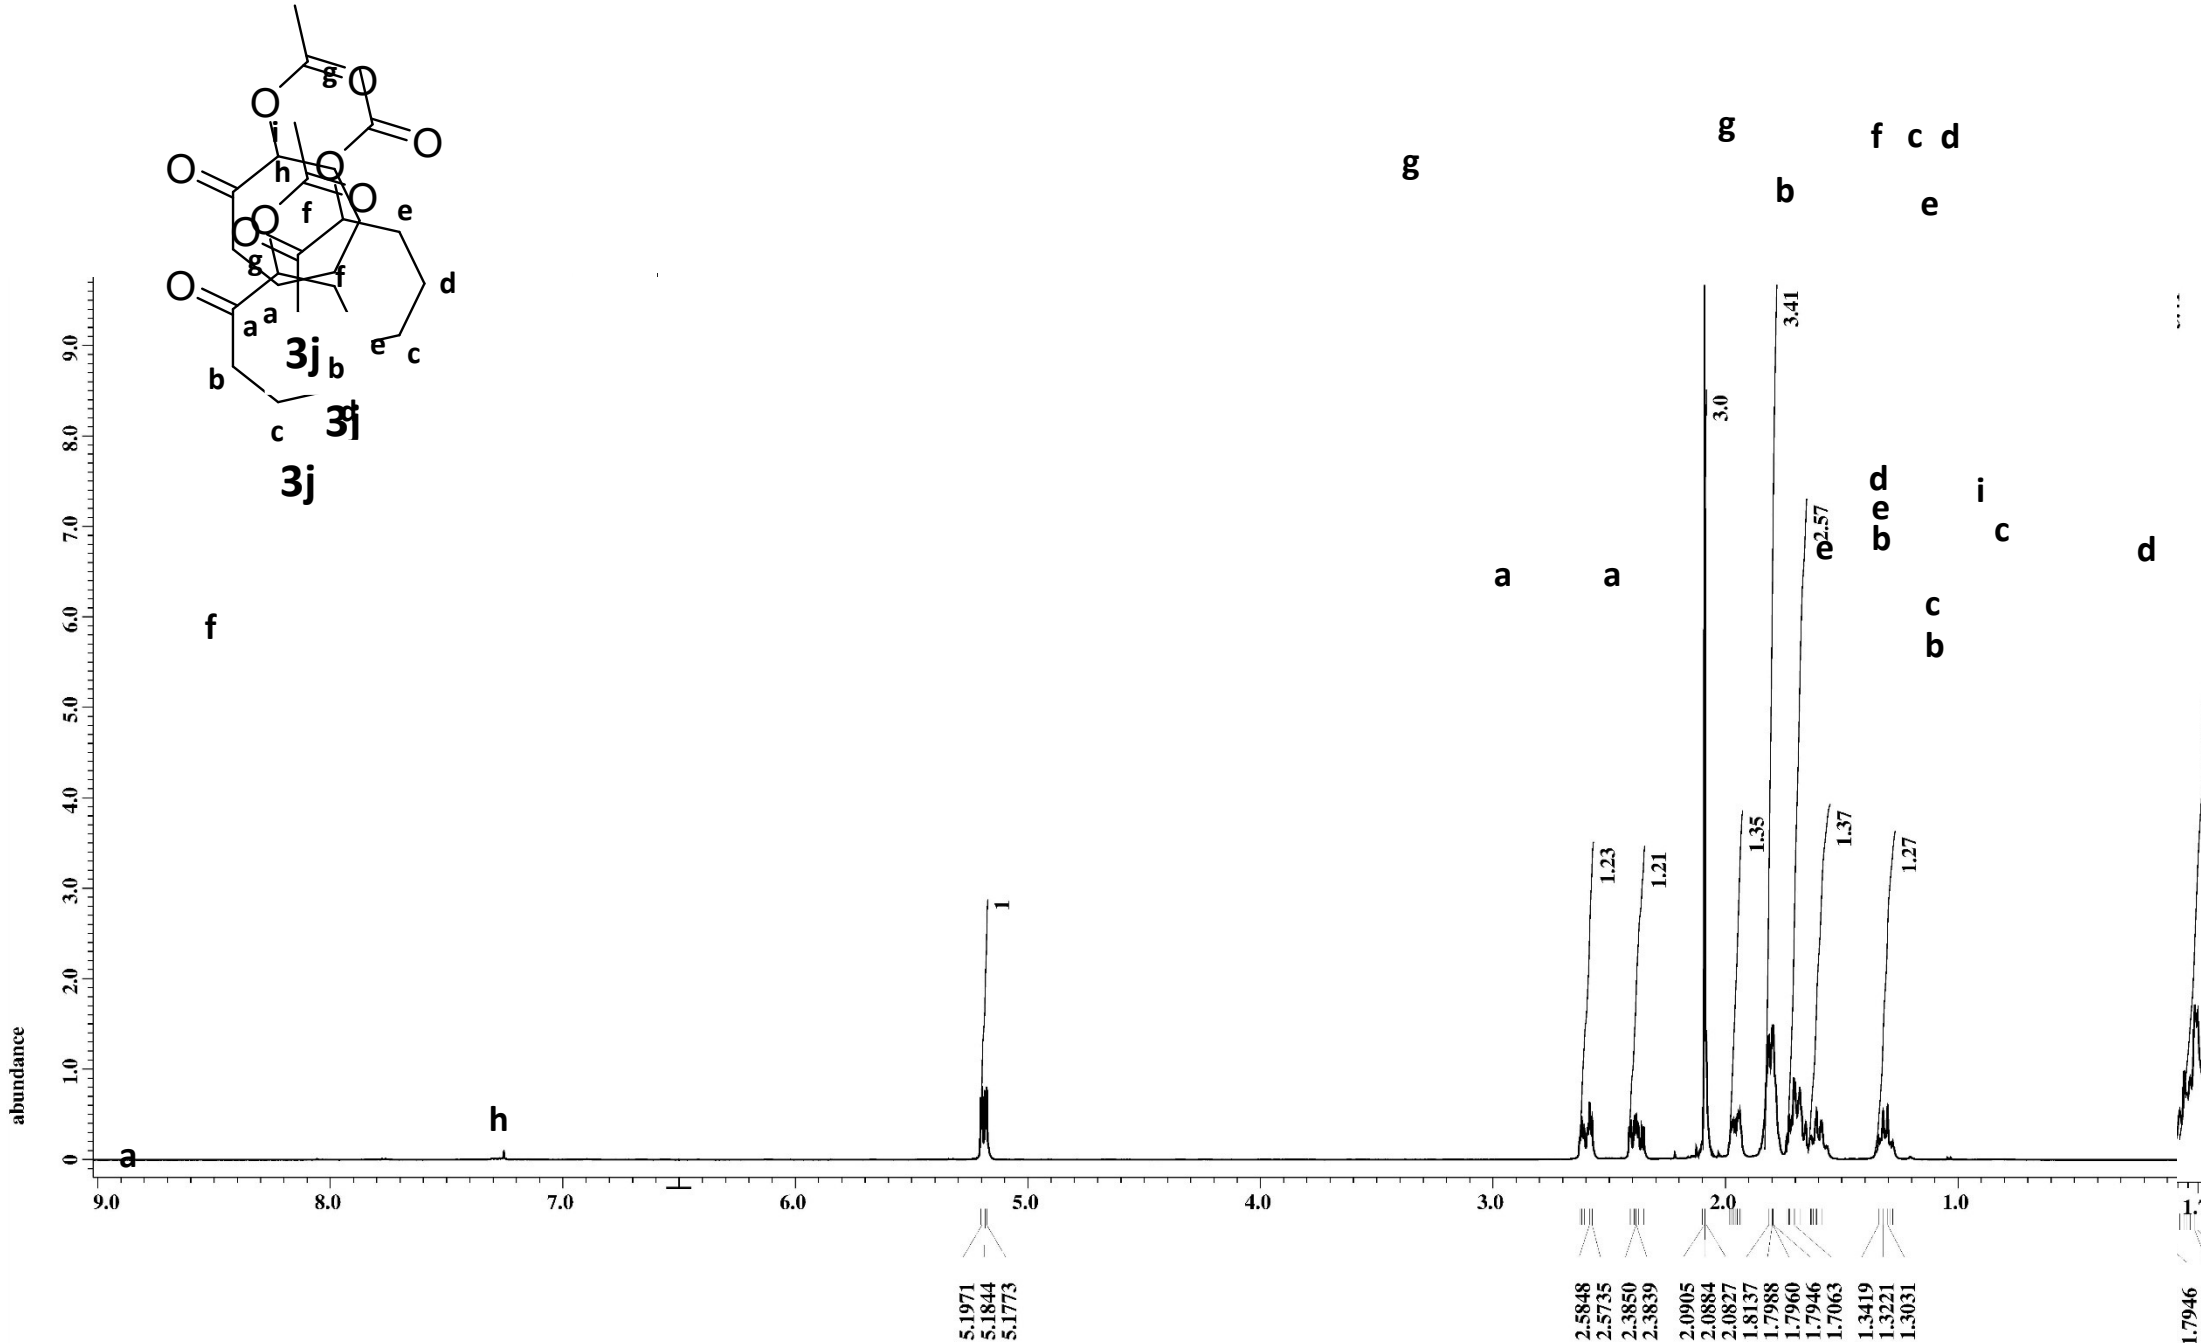

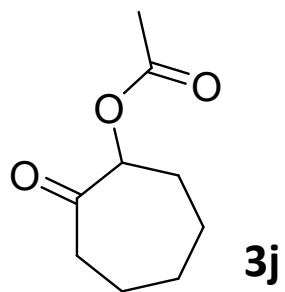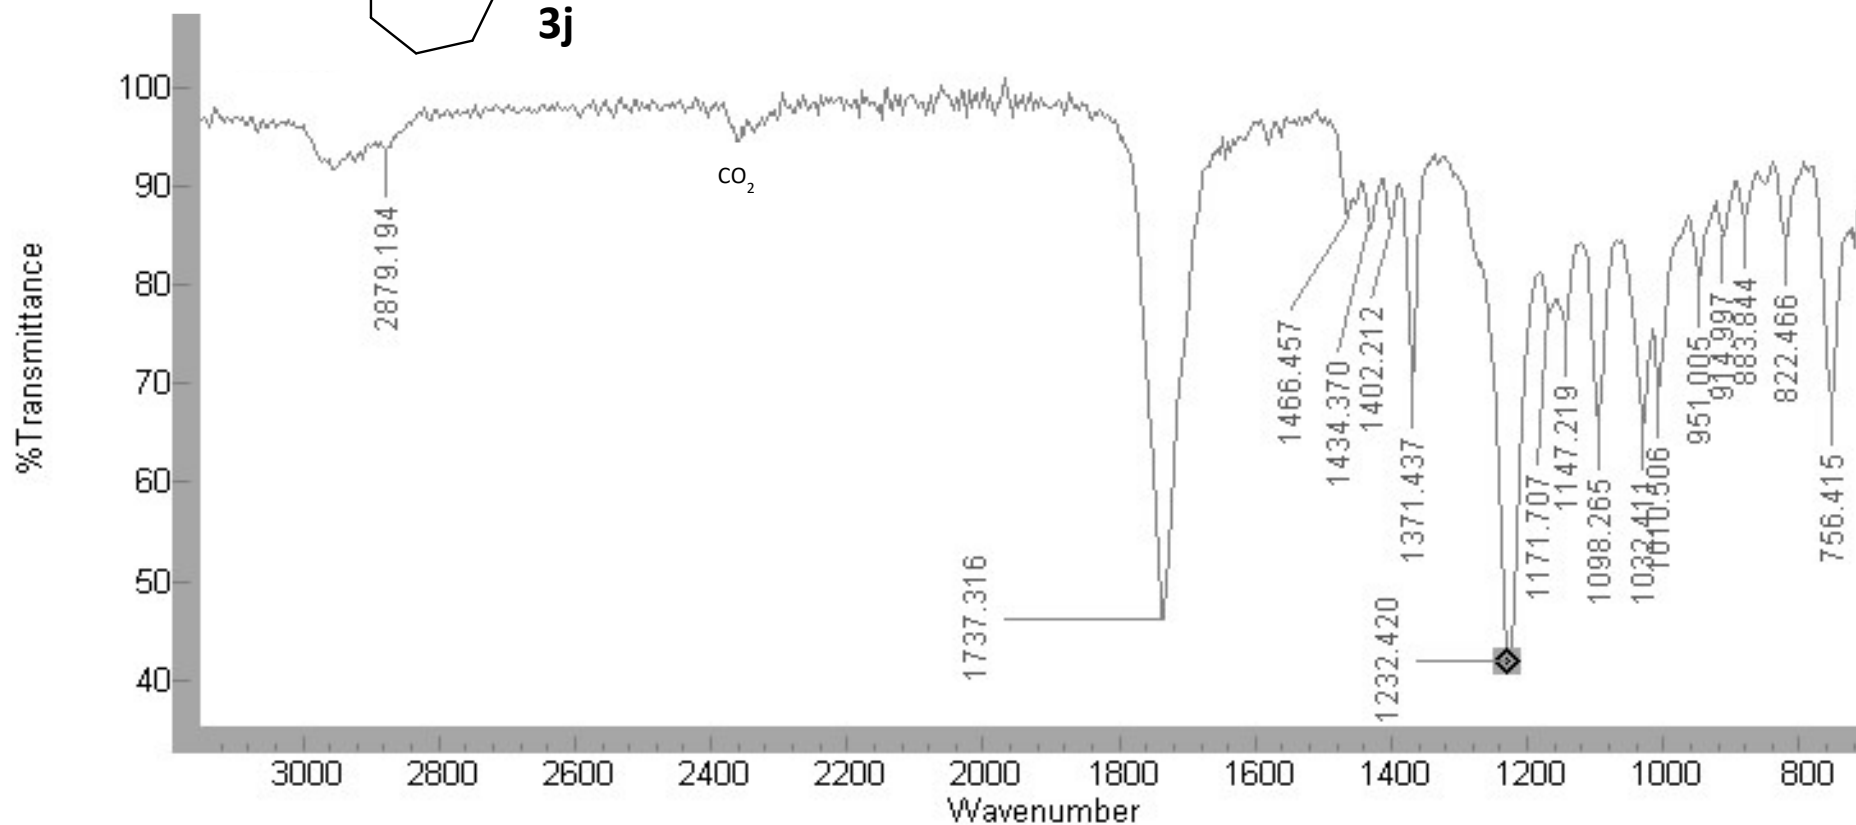

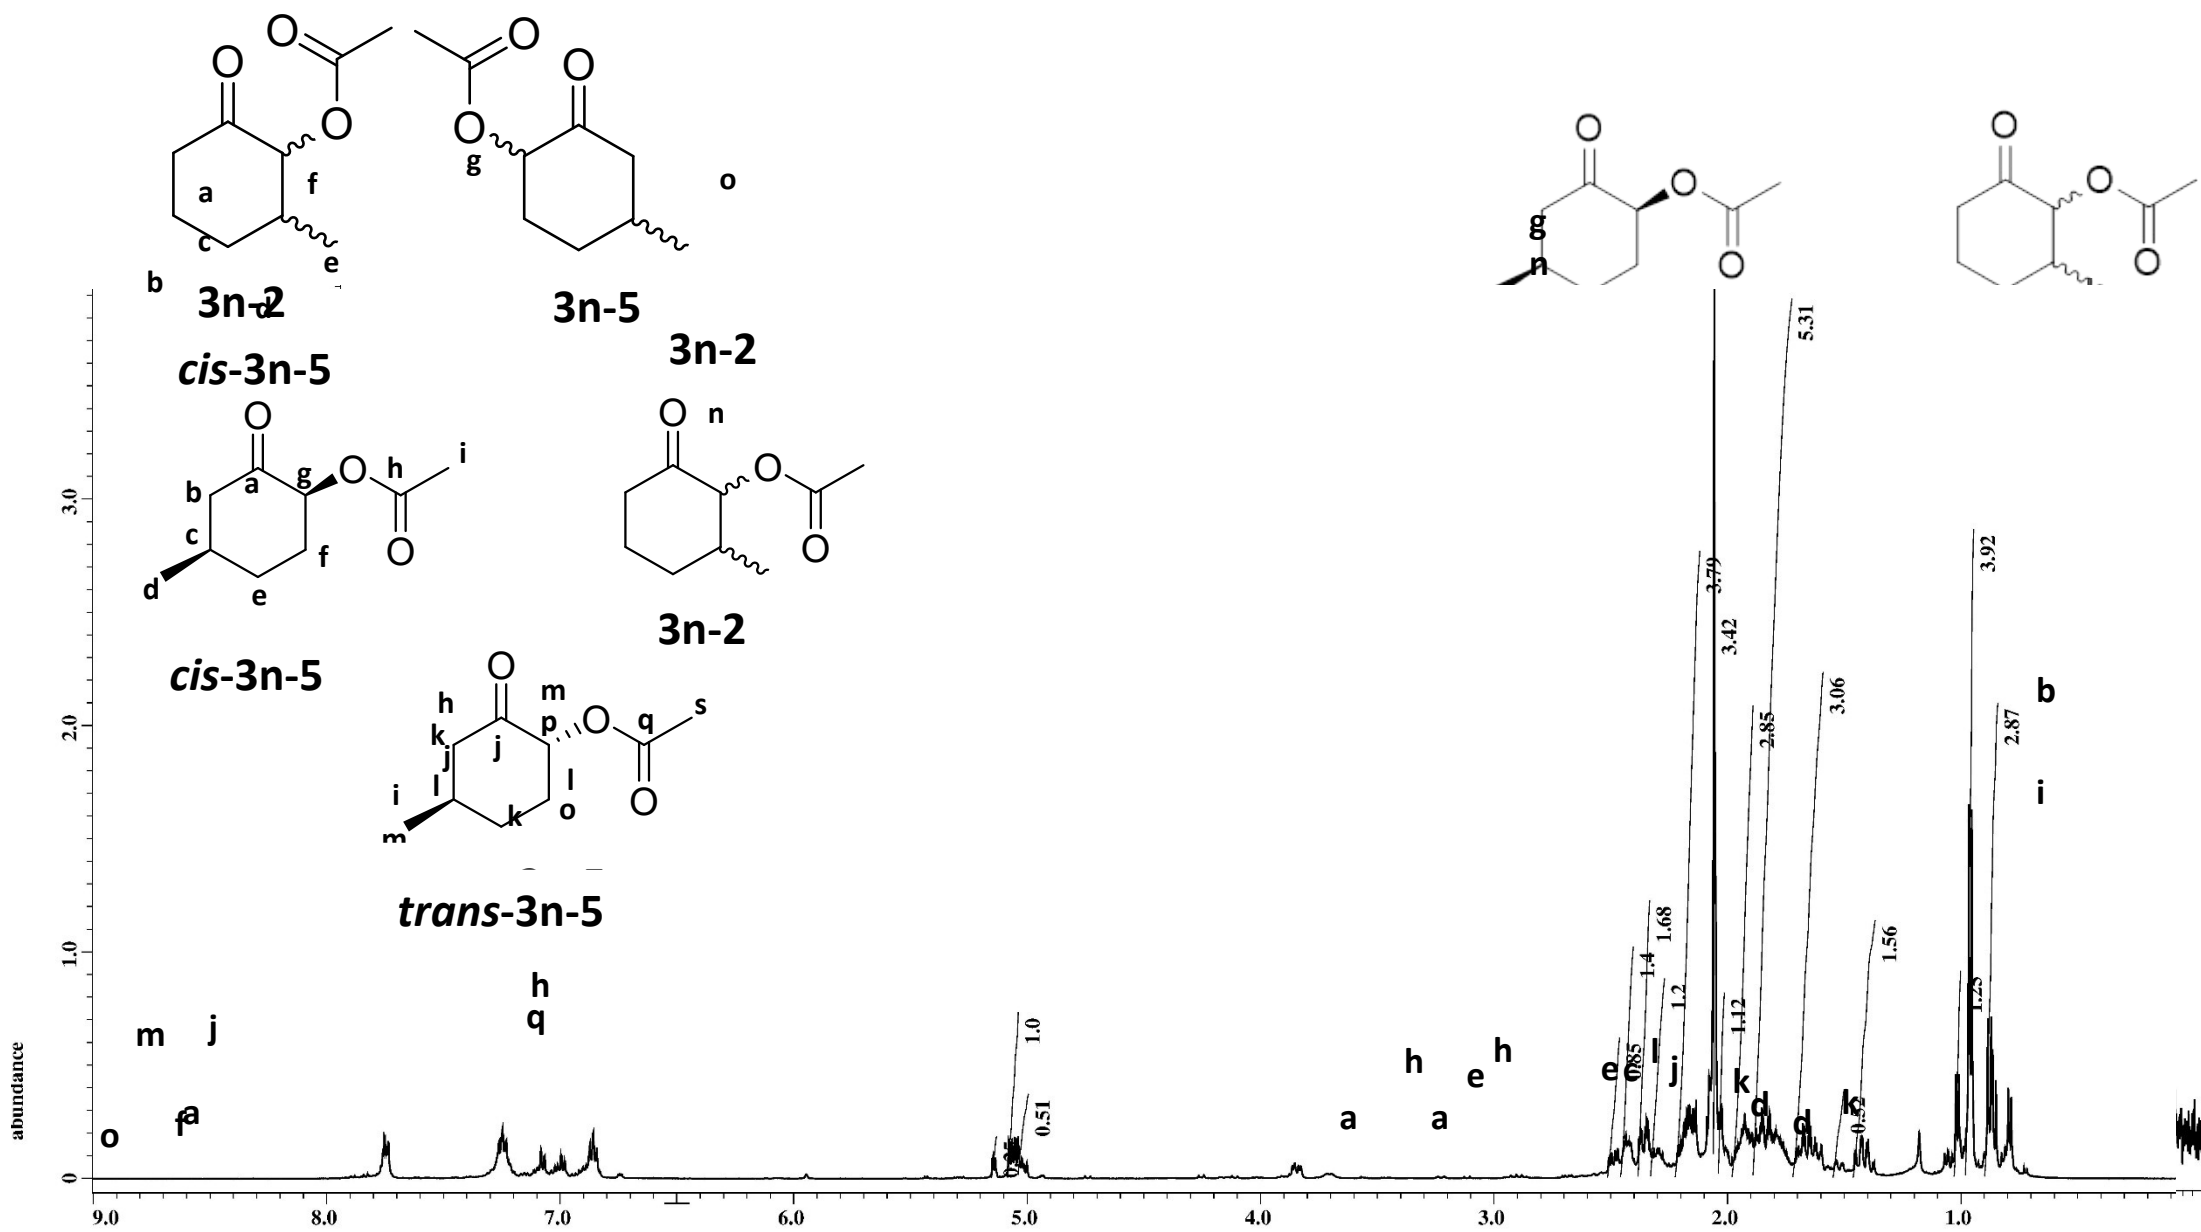

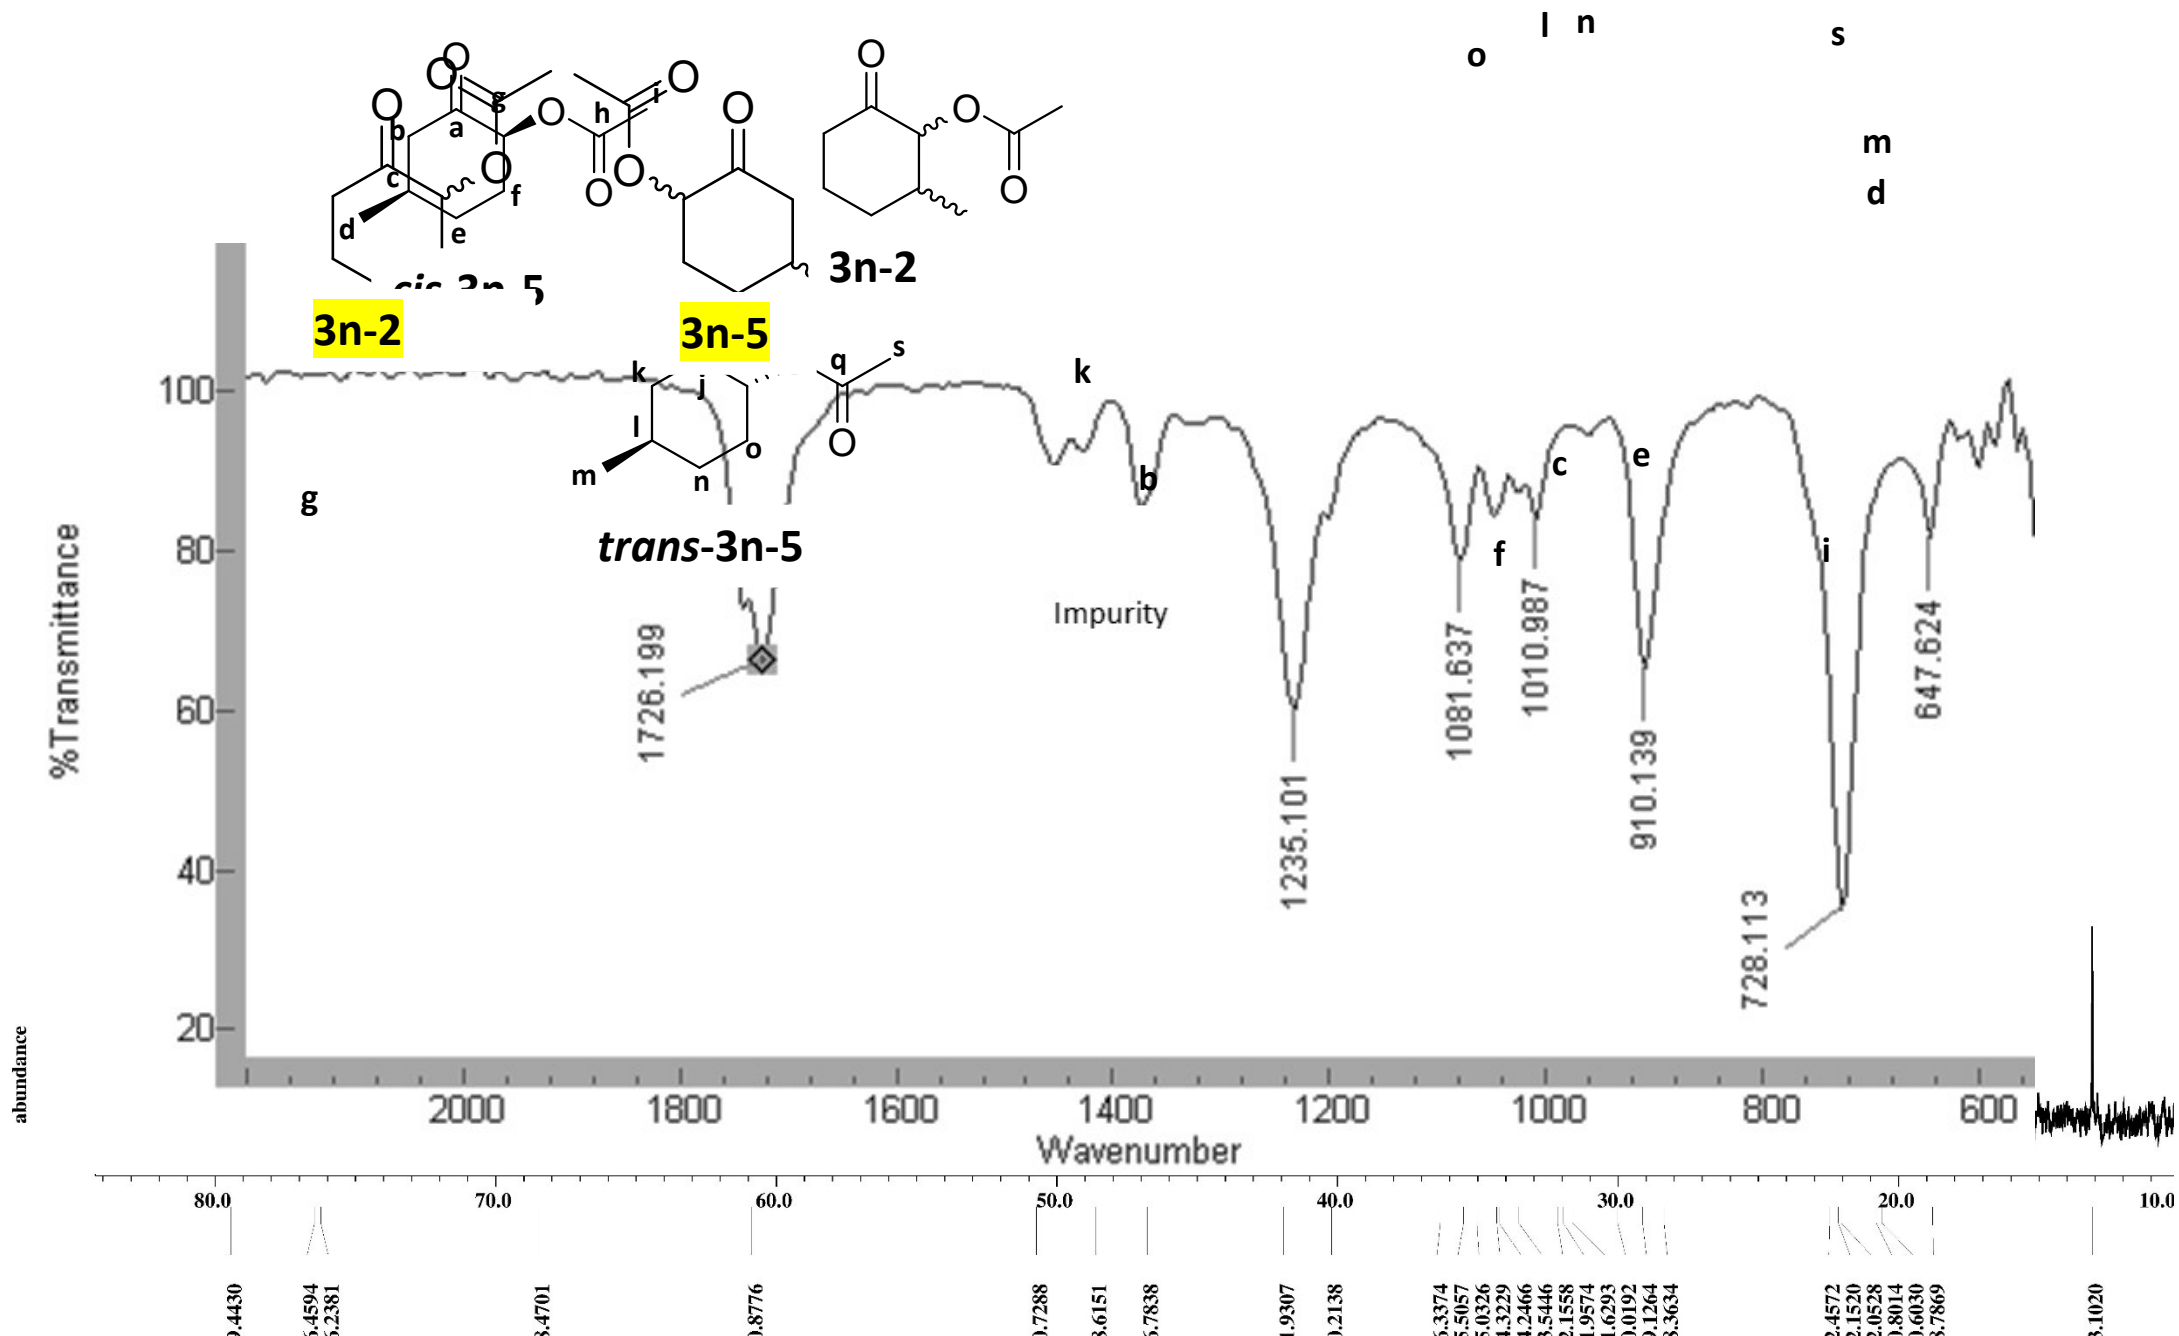

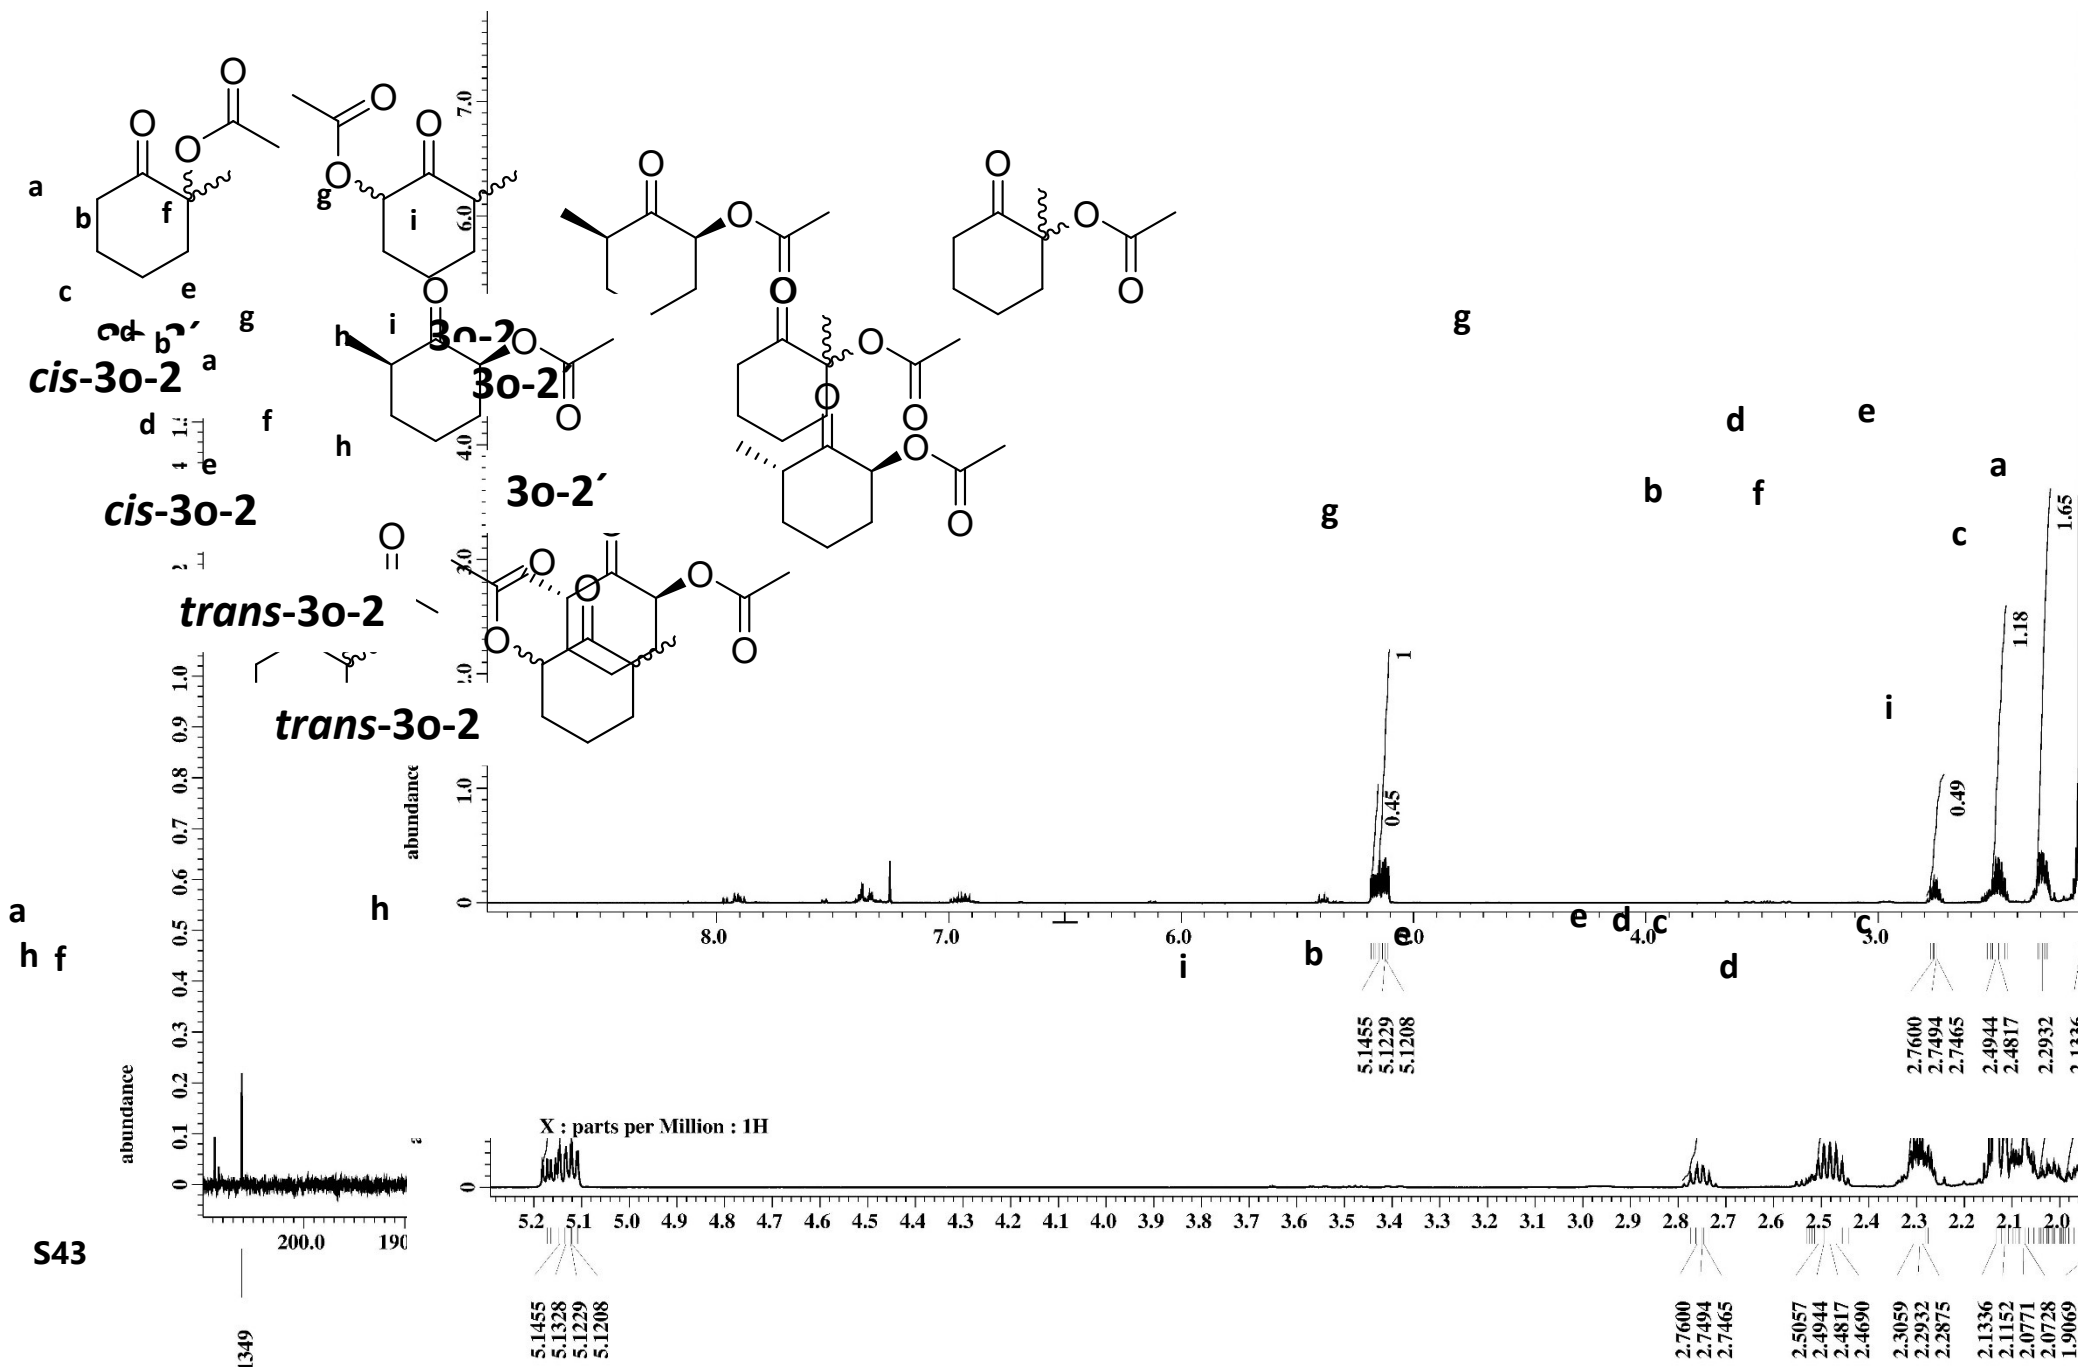

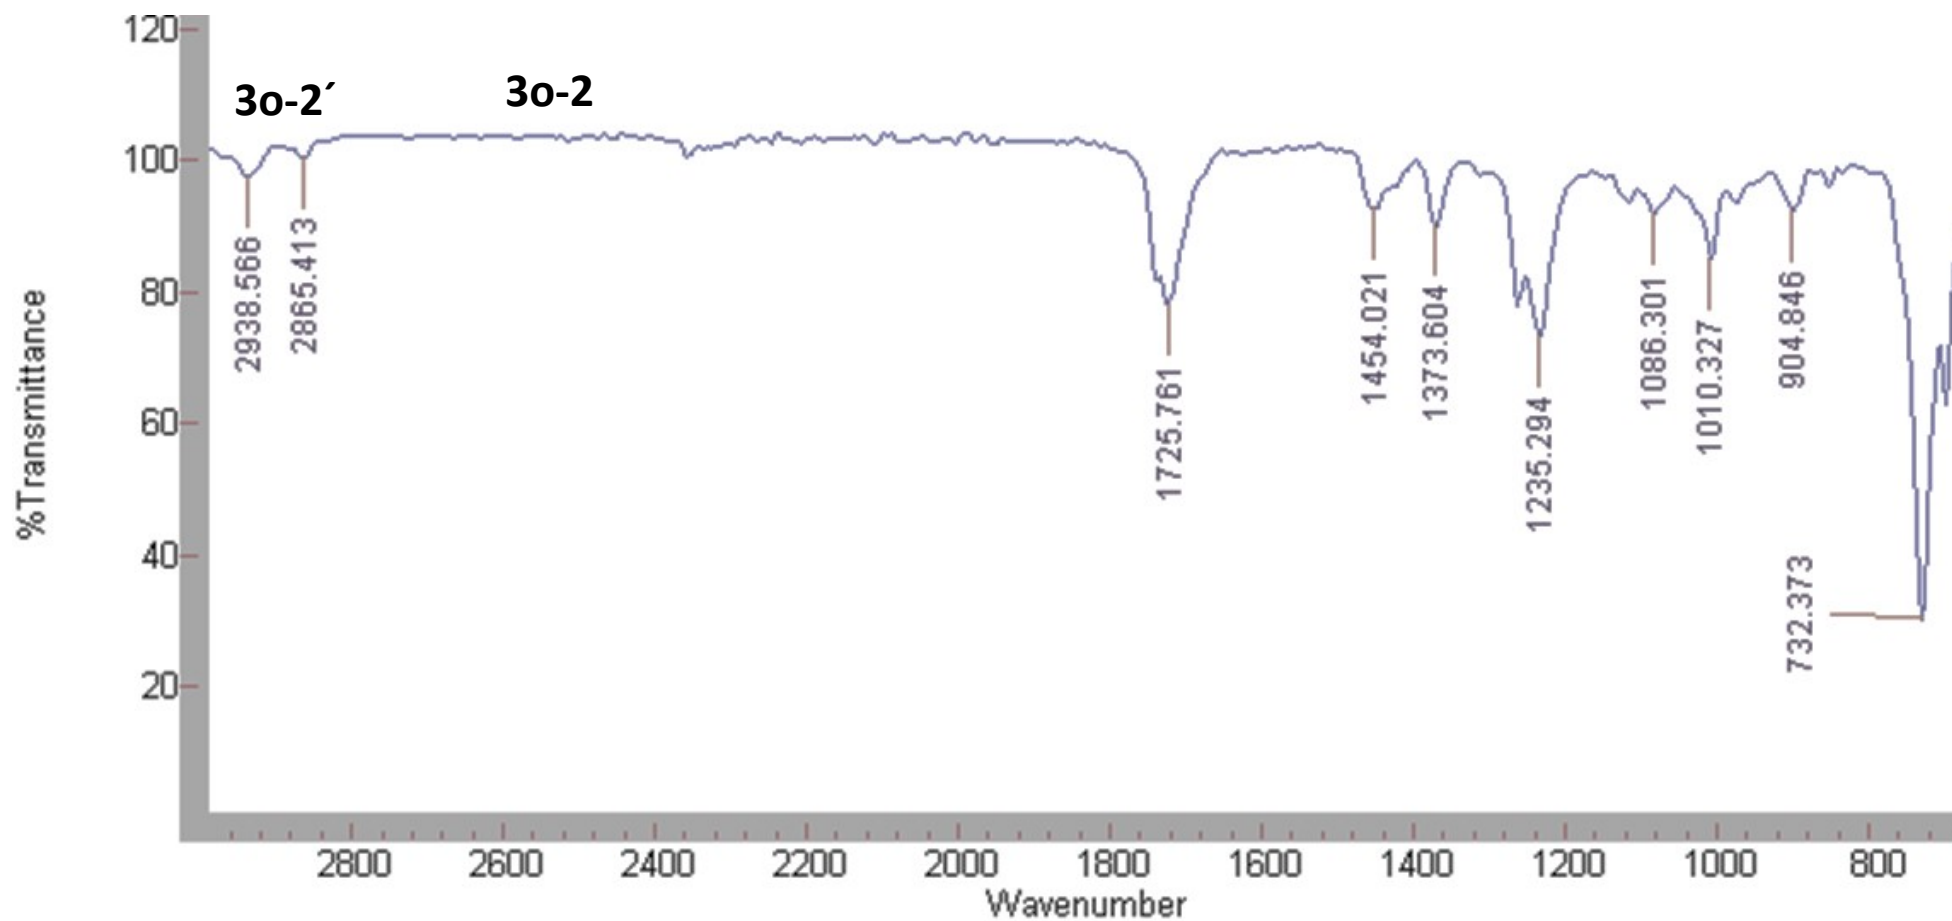

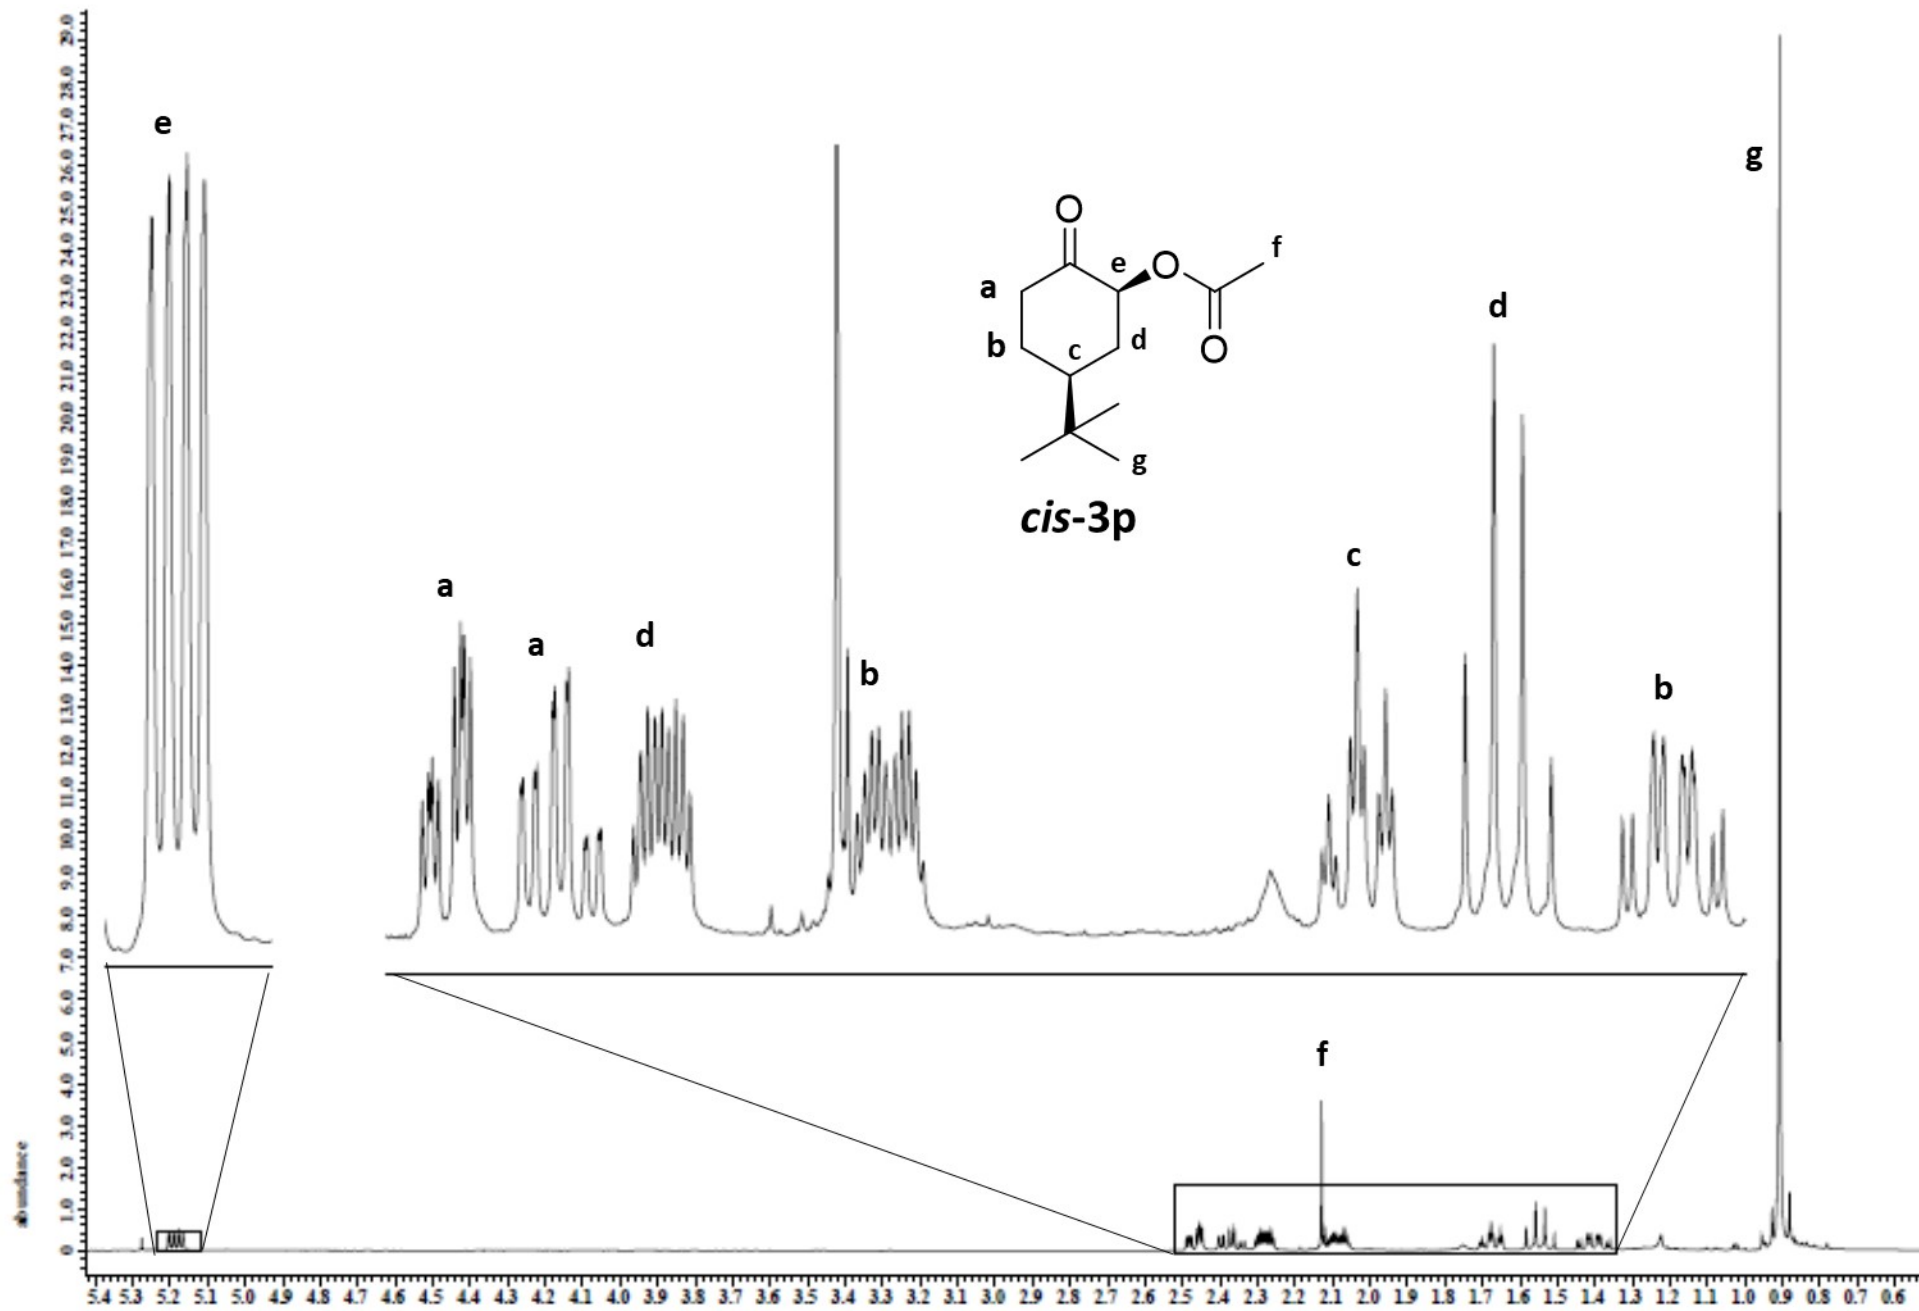

X : parts per Million : 1H

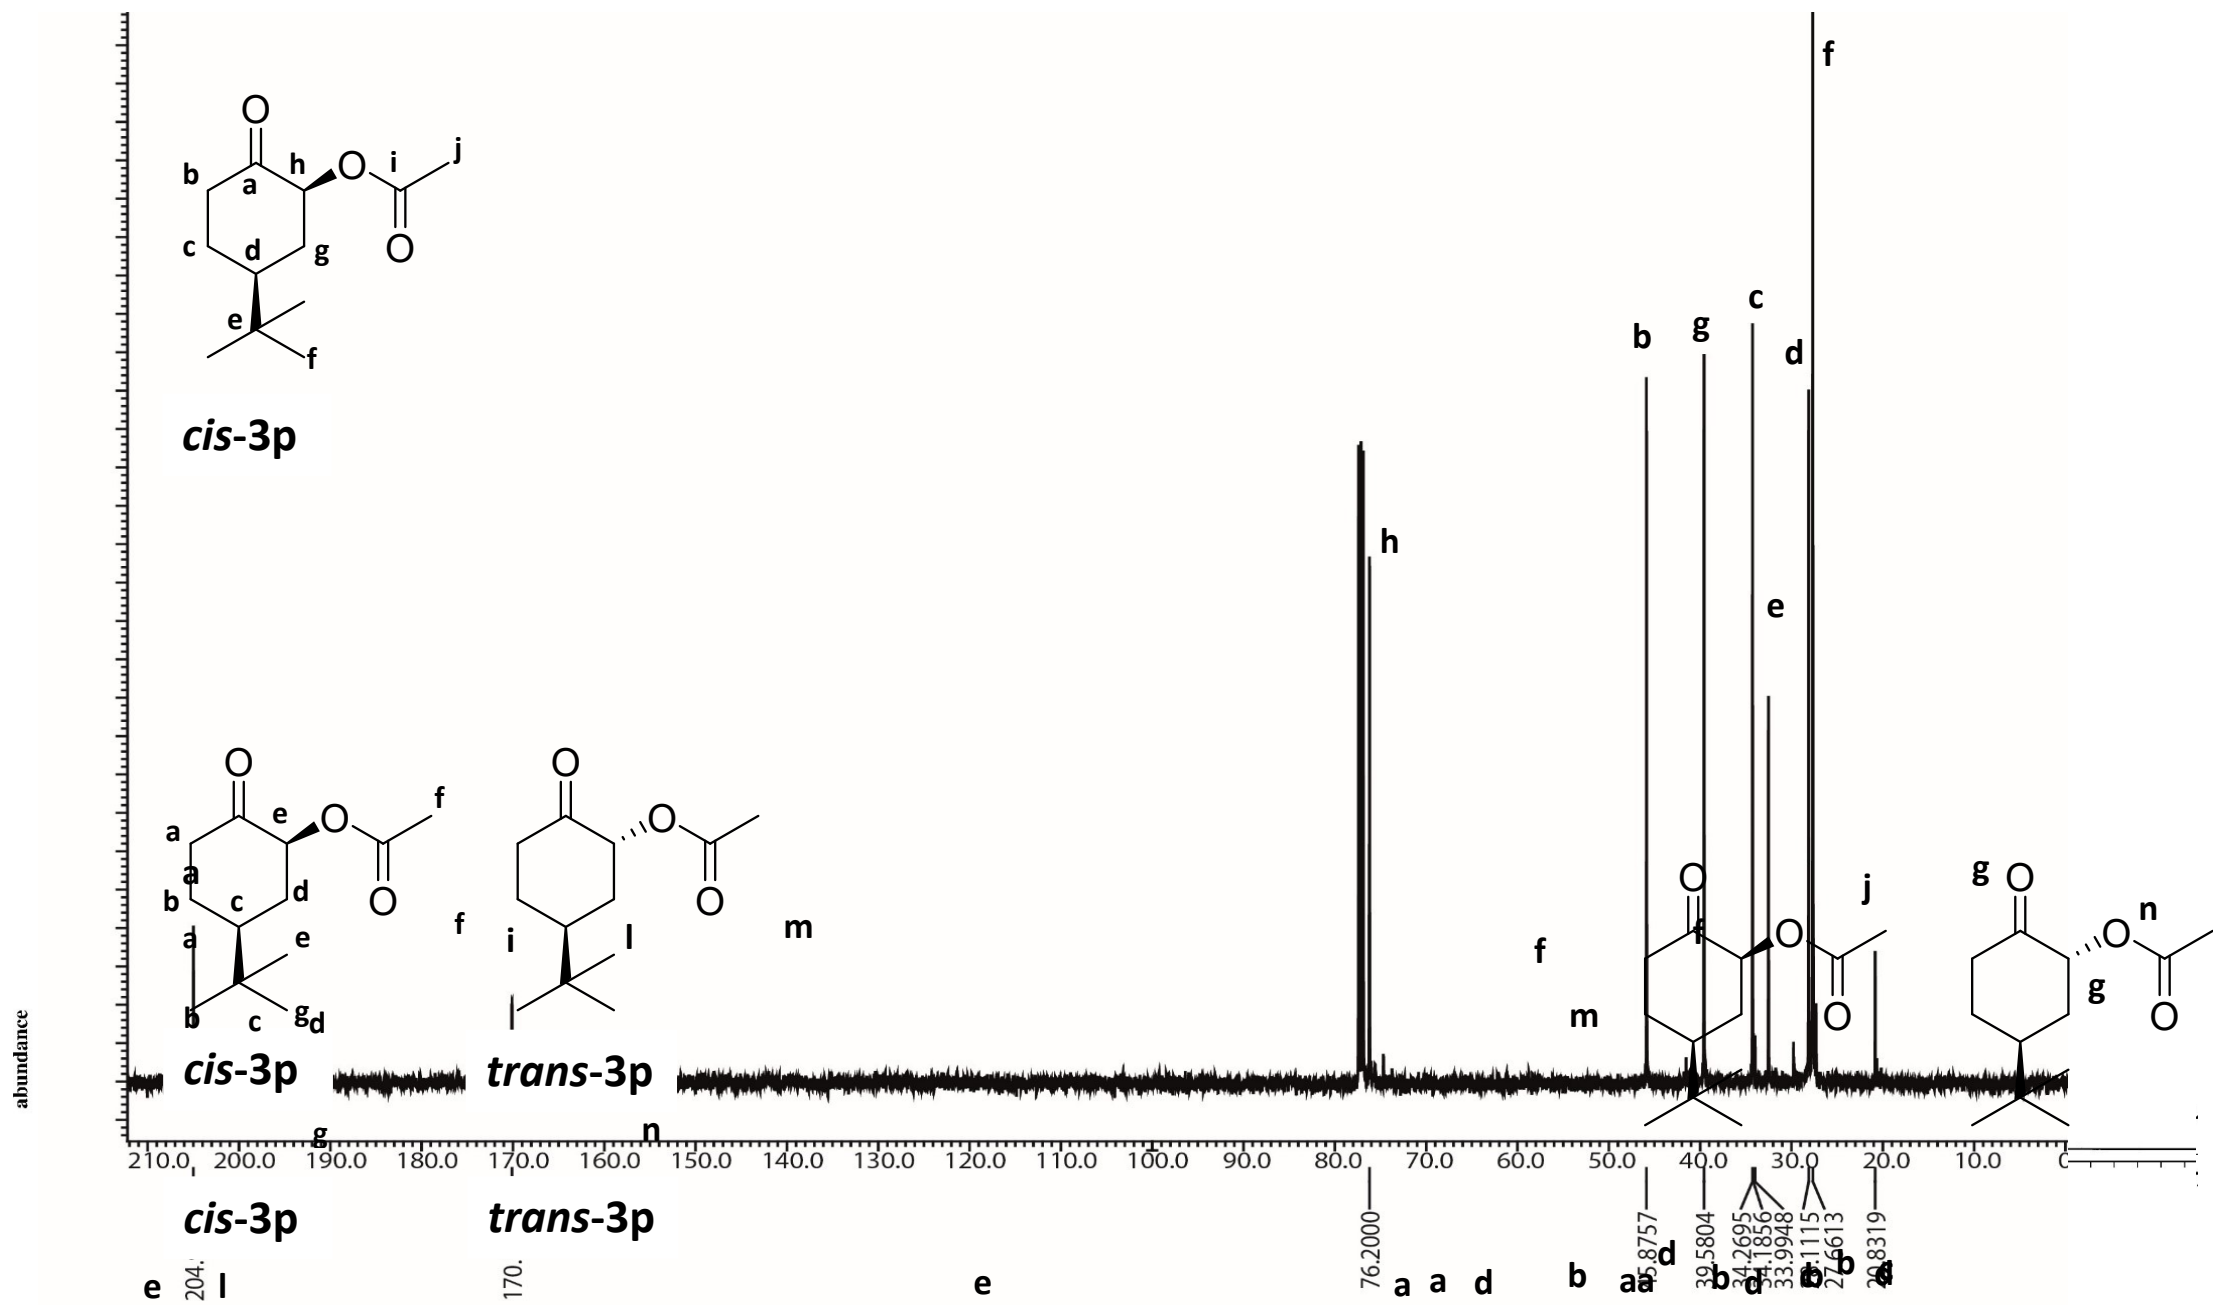



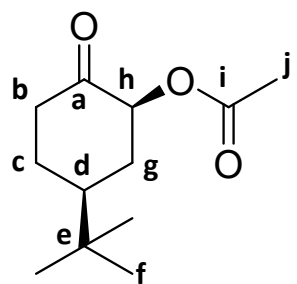

***cis-3p***

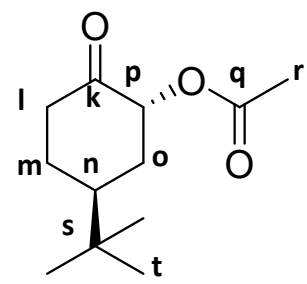

***trans-3p***

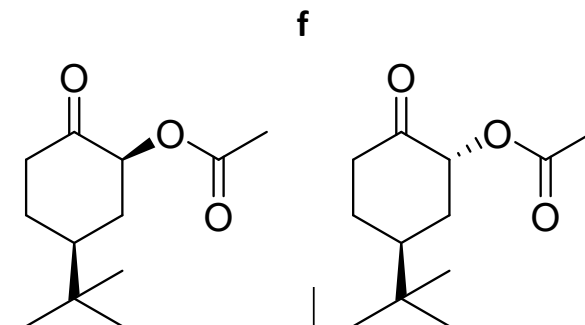

**f**

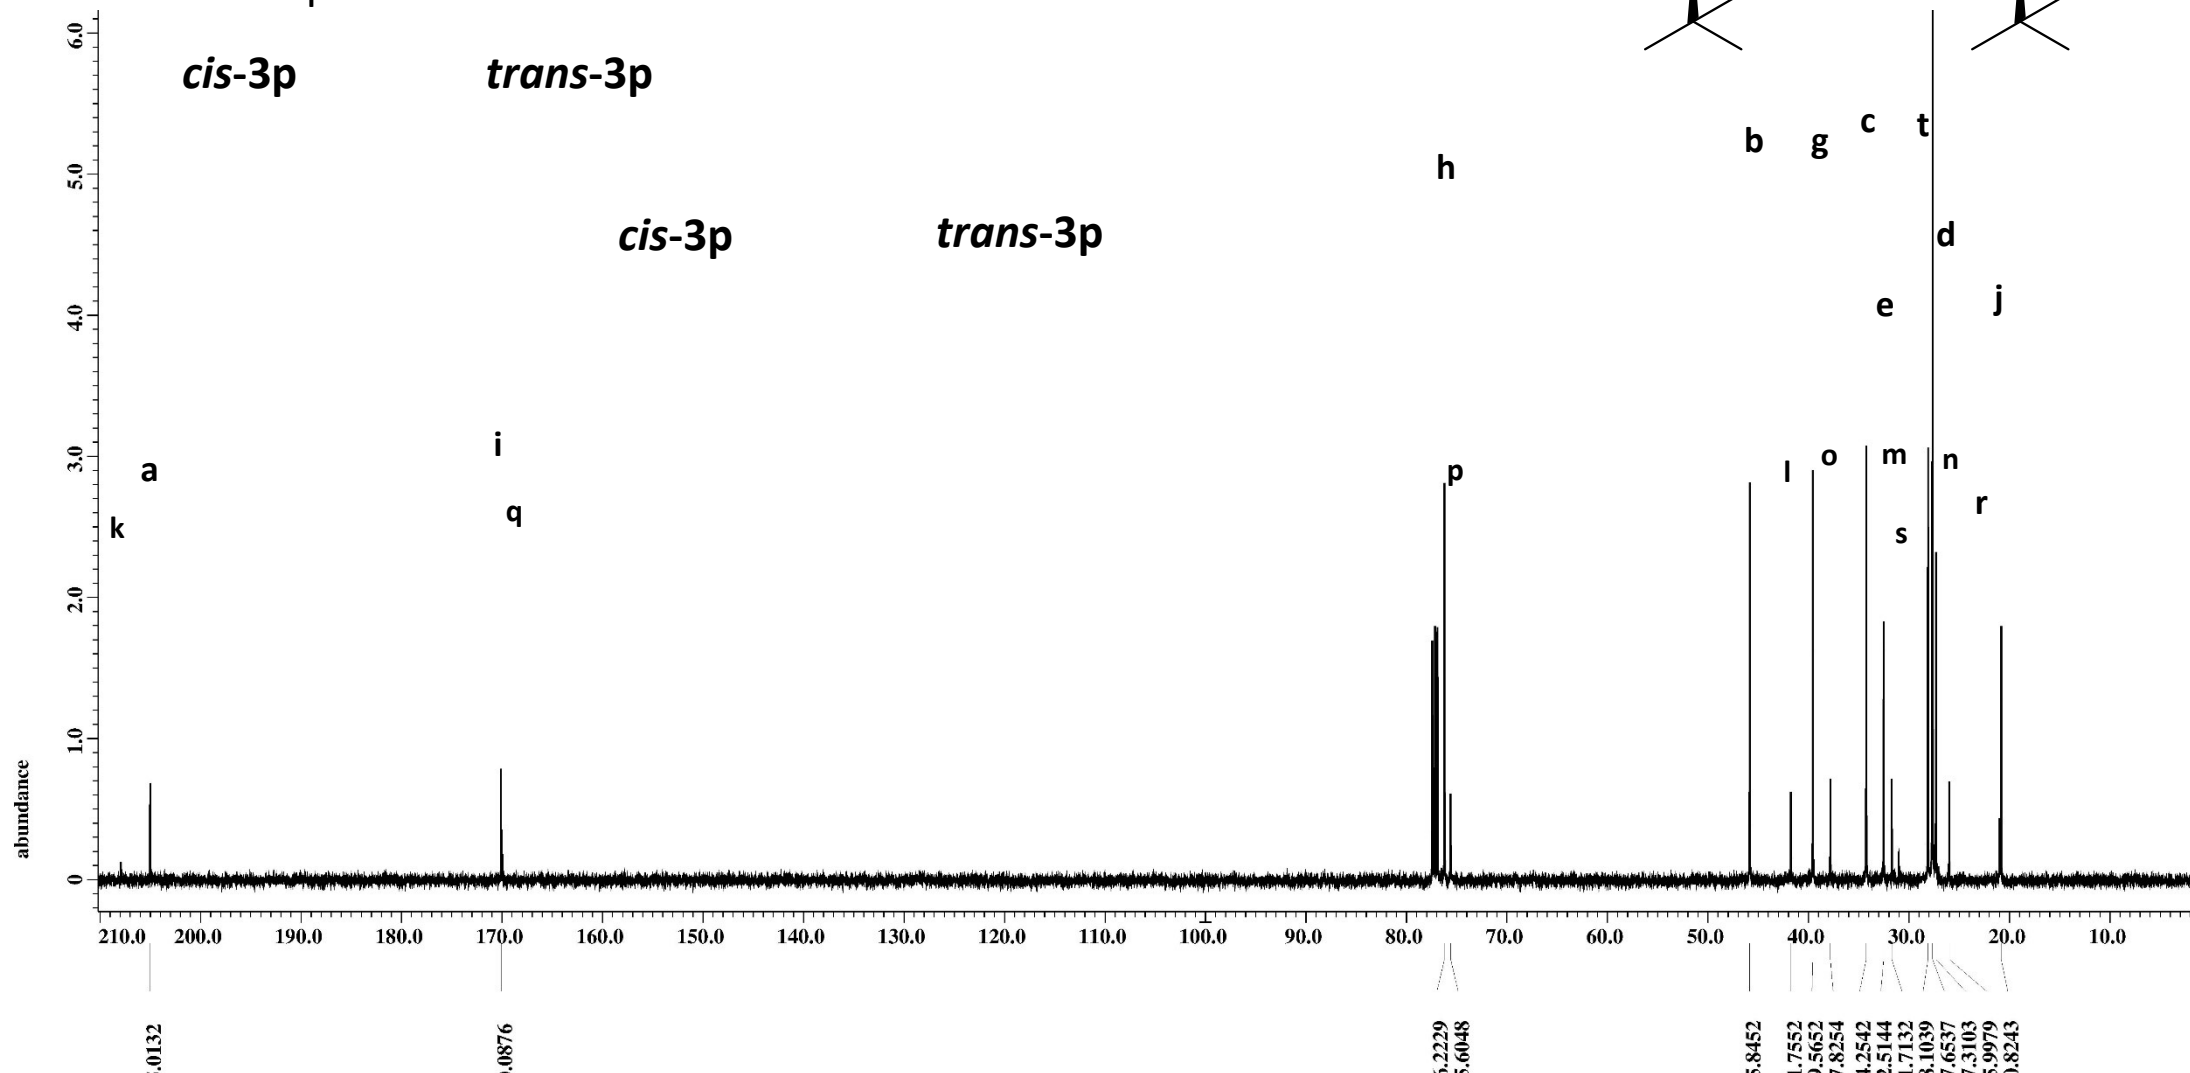

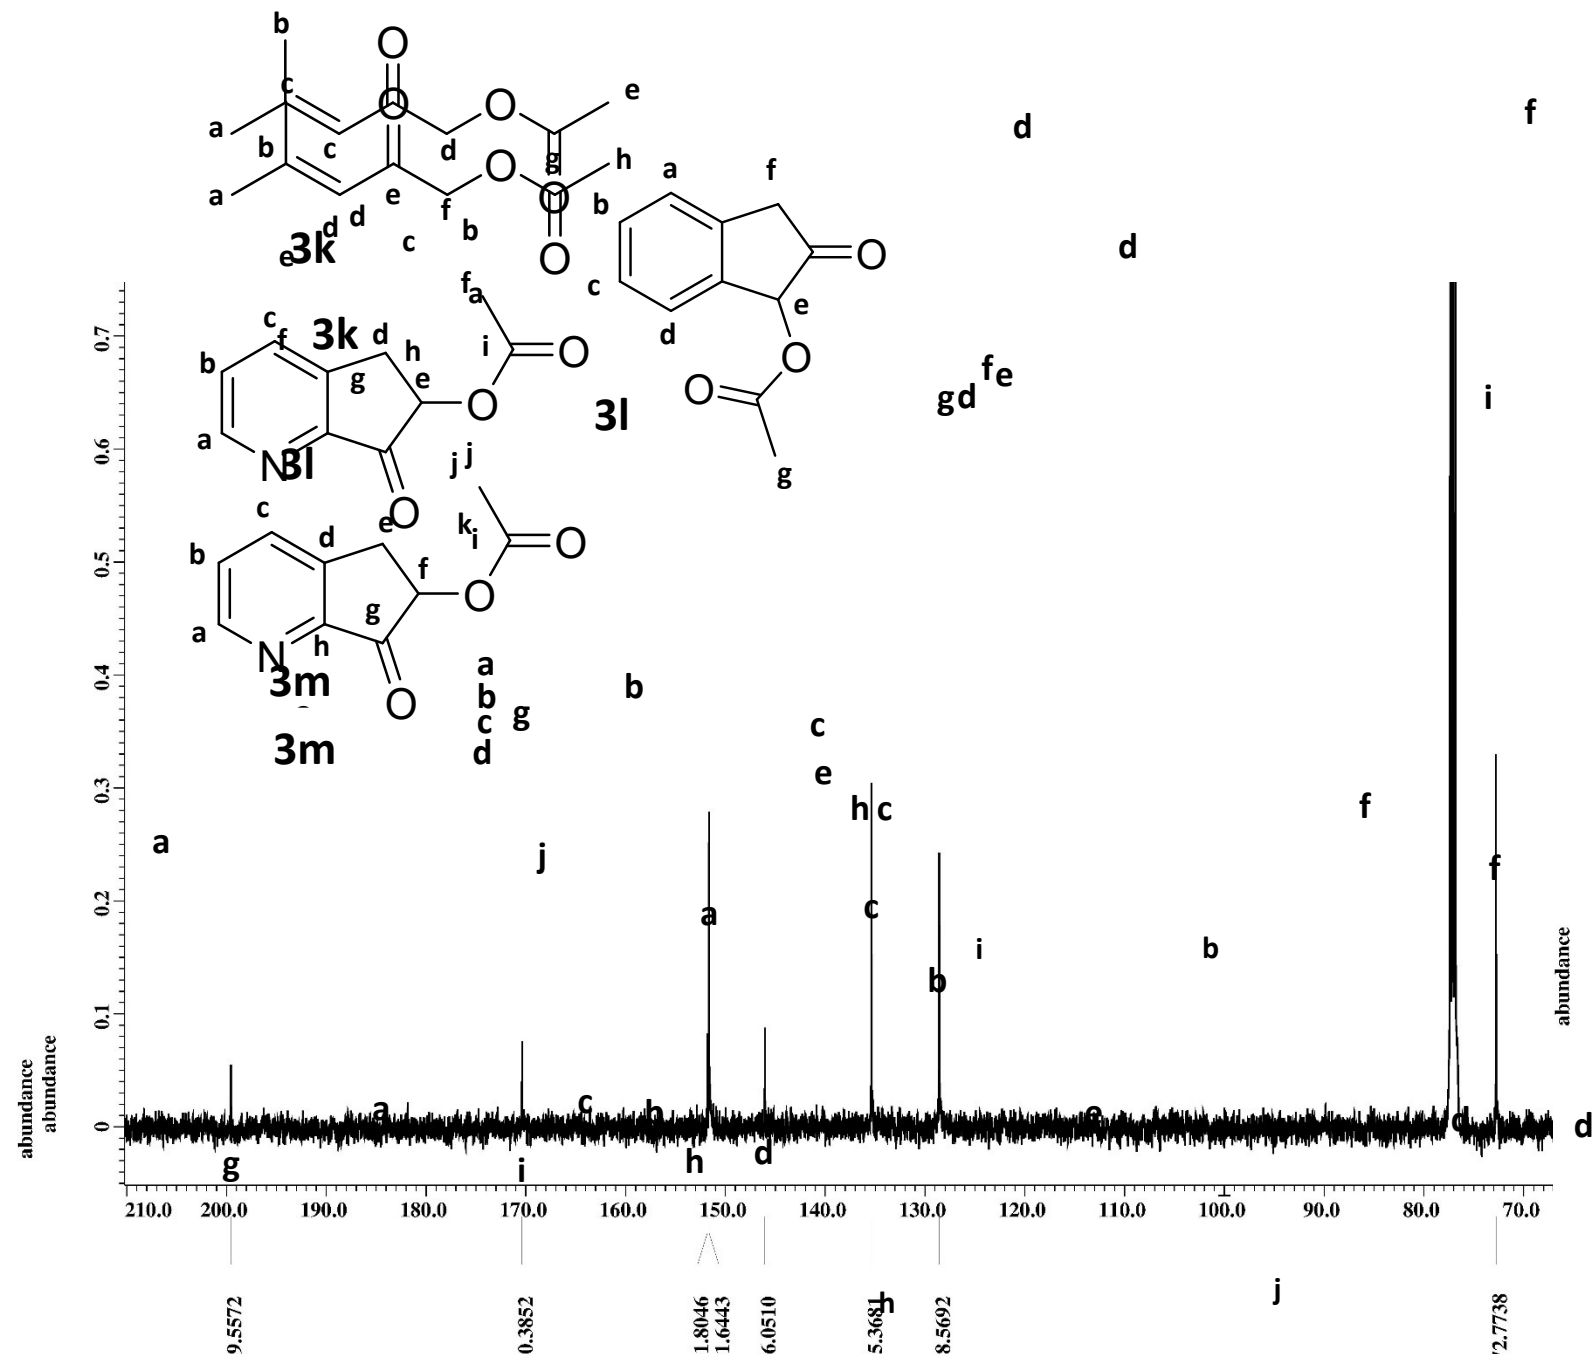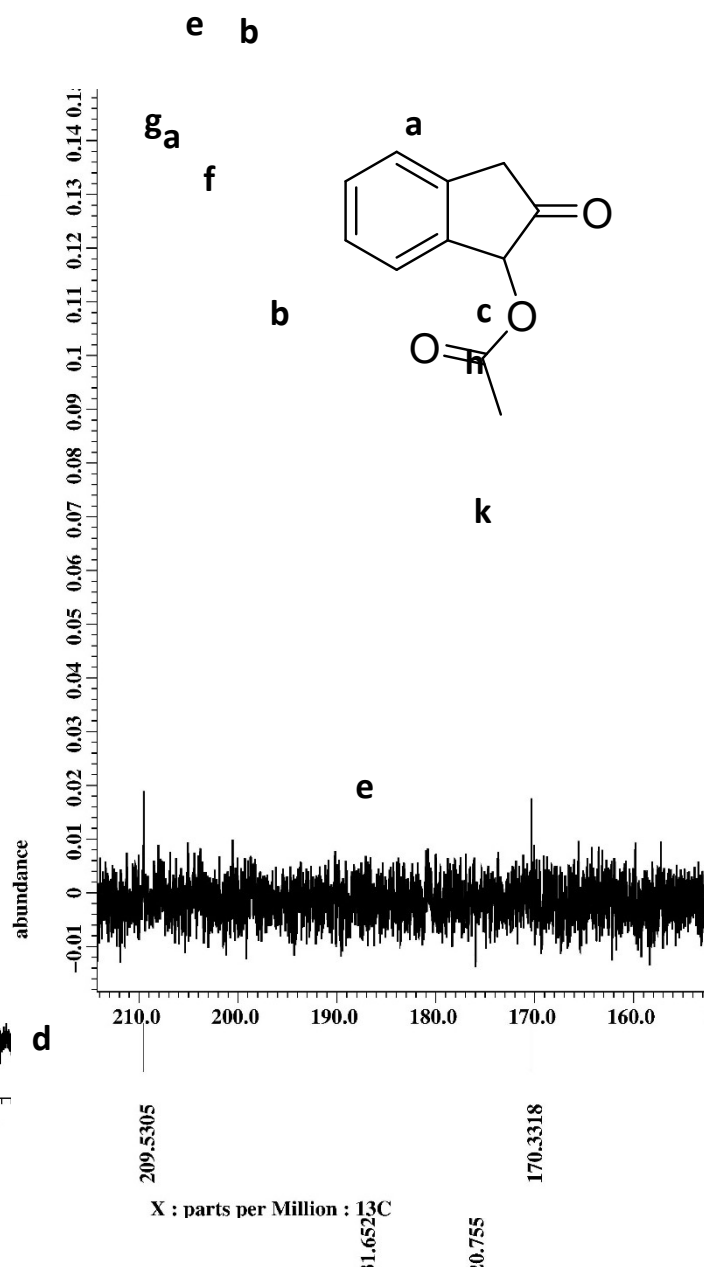

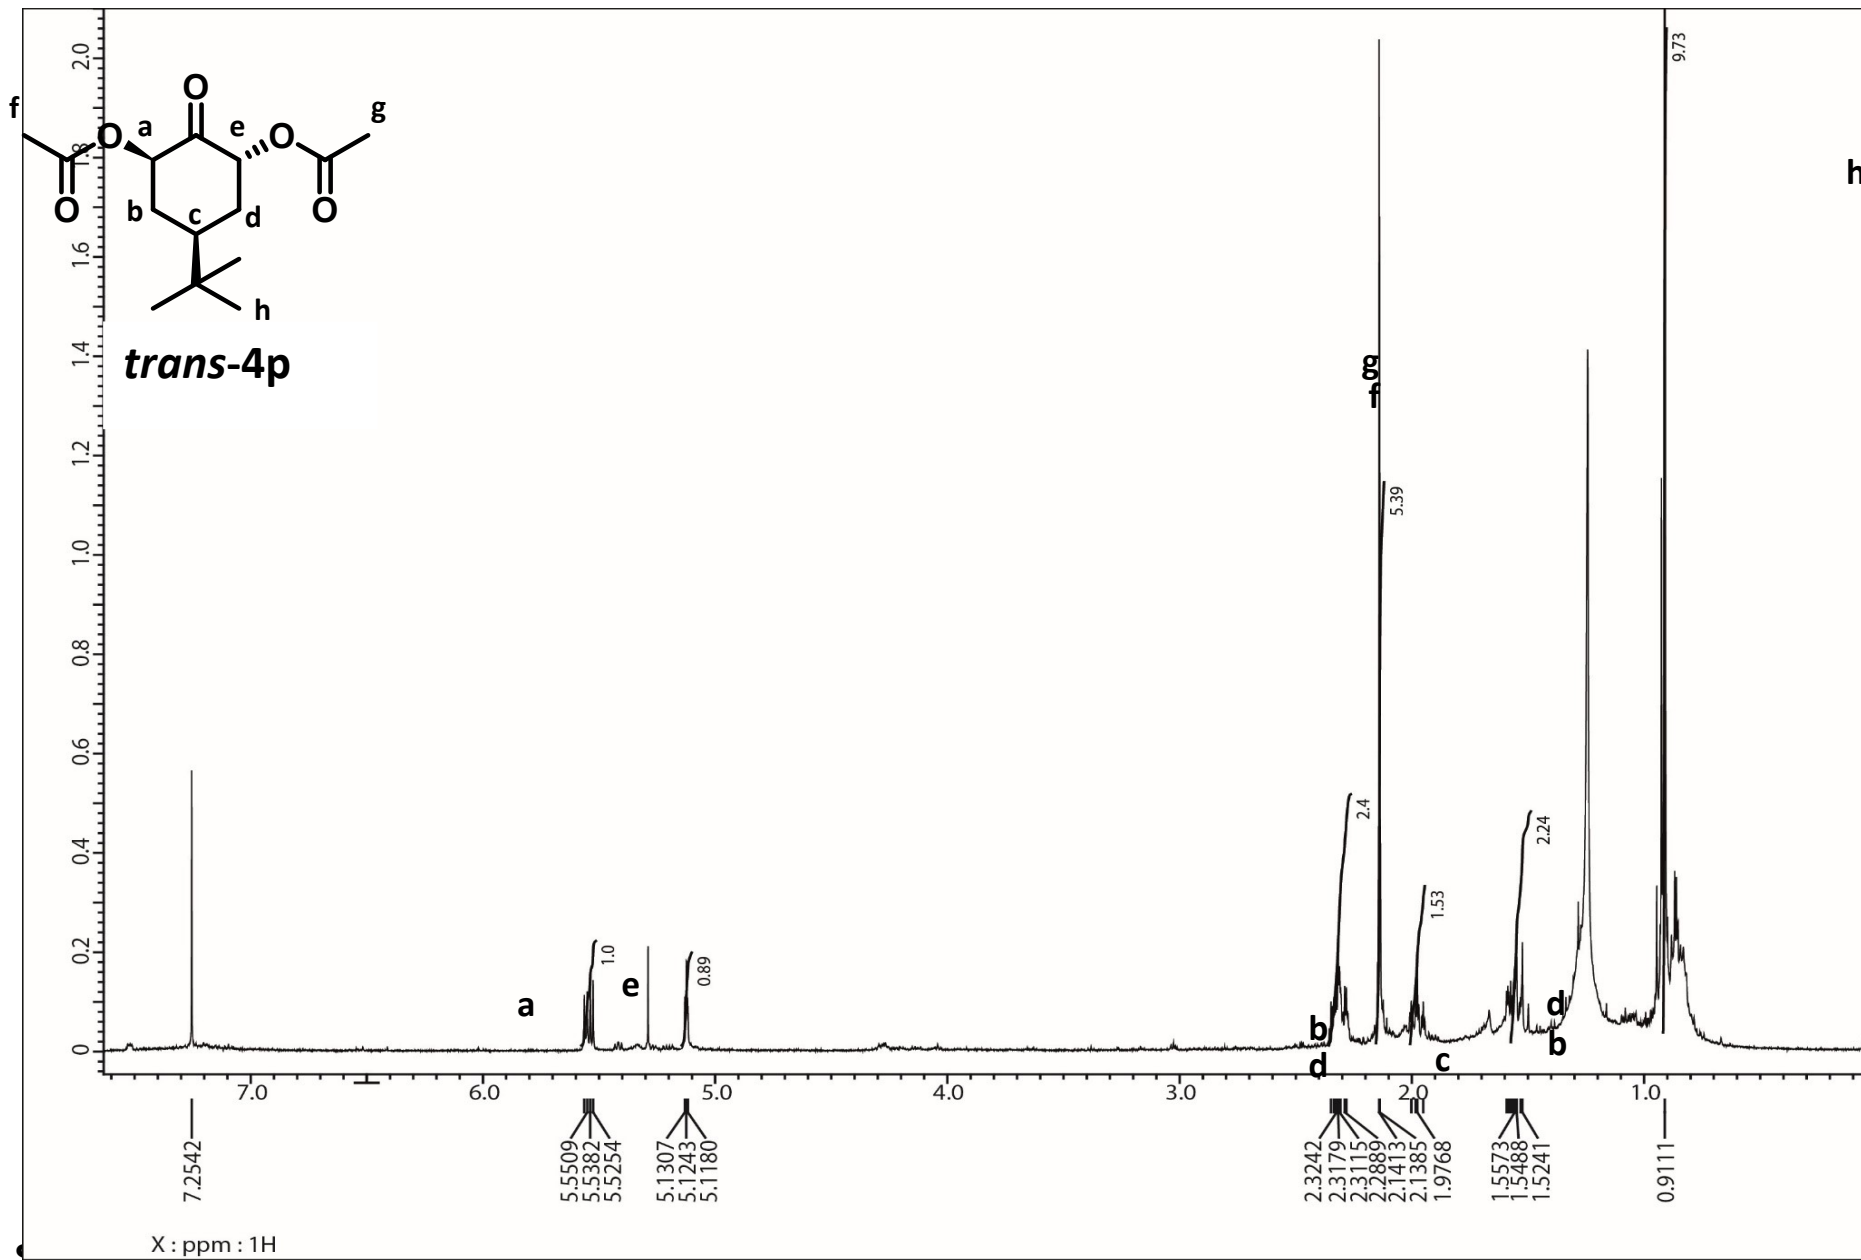

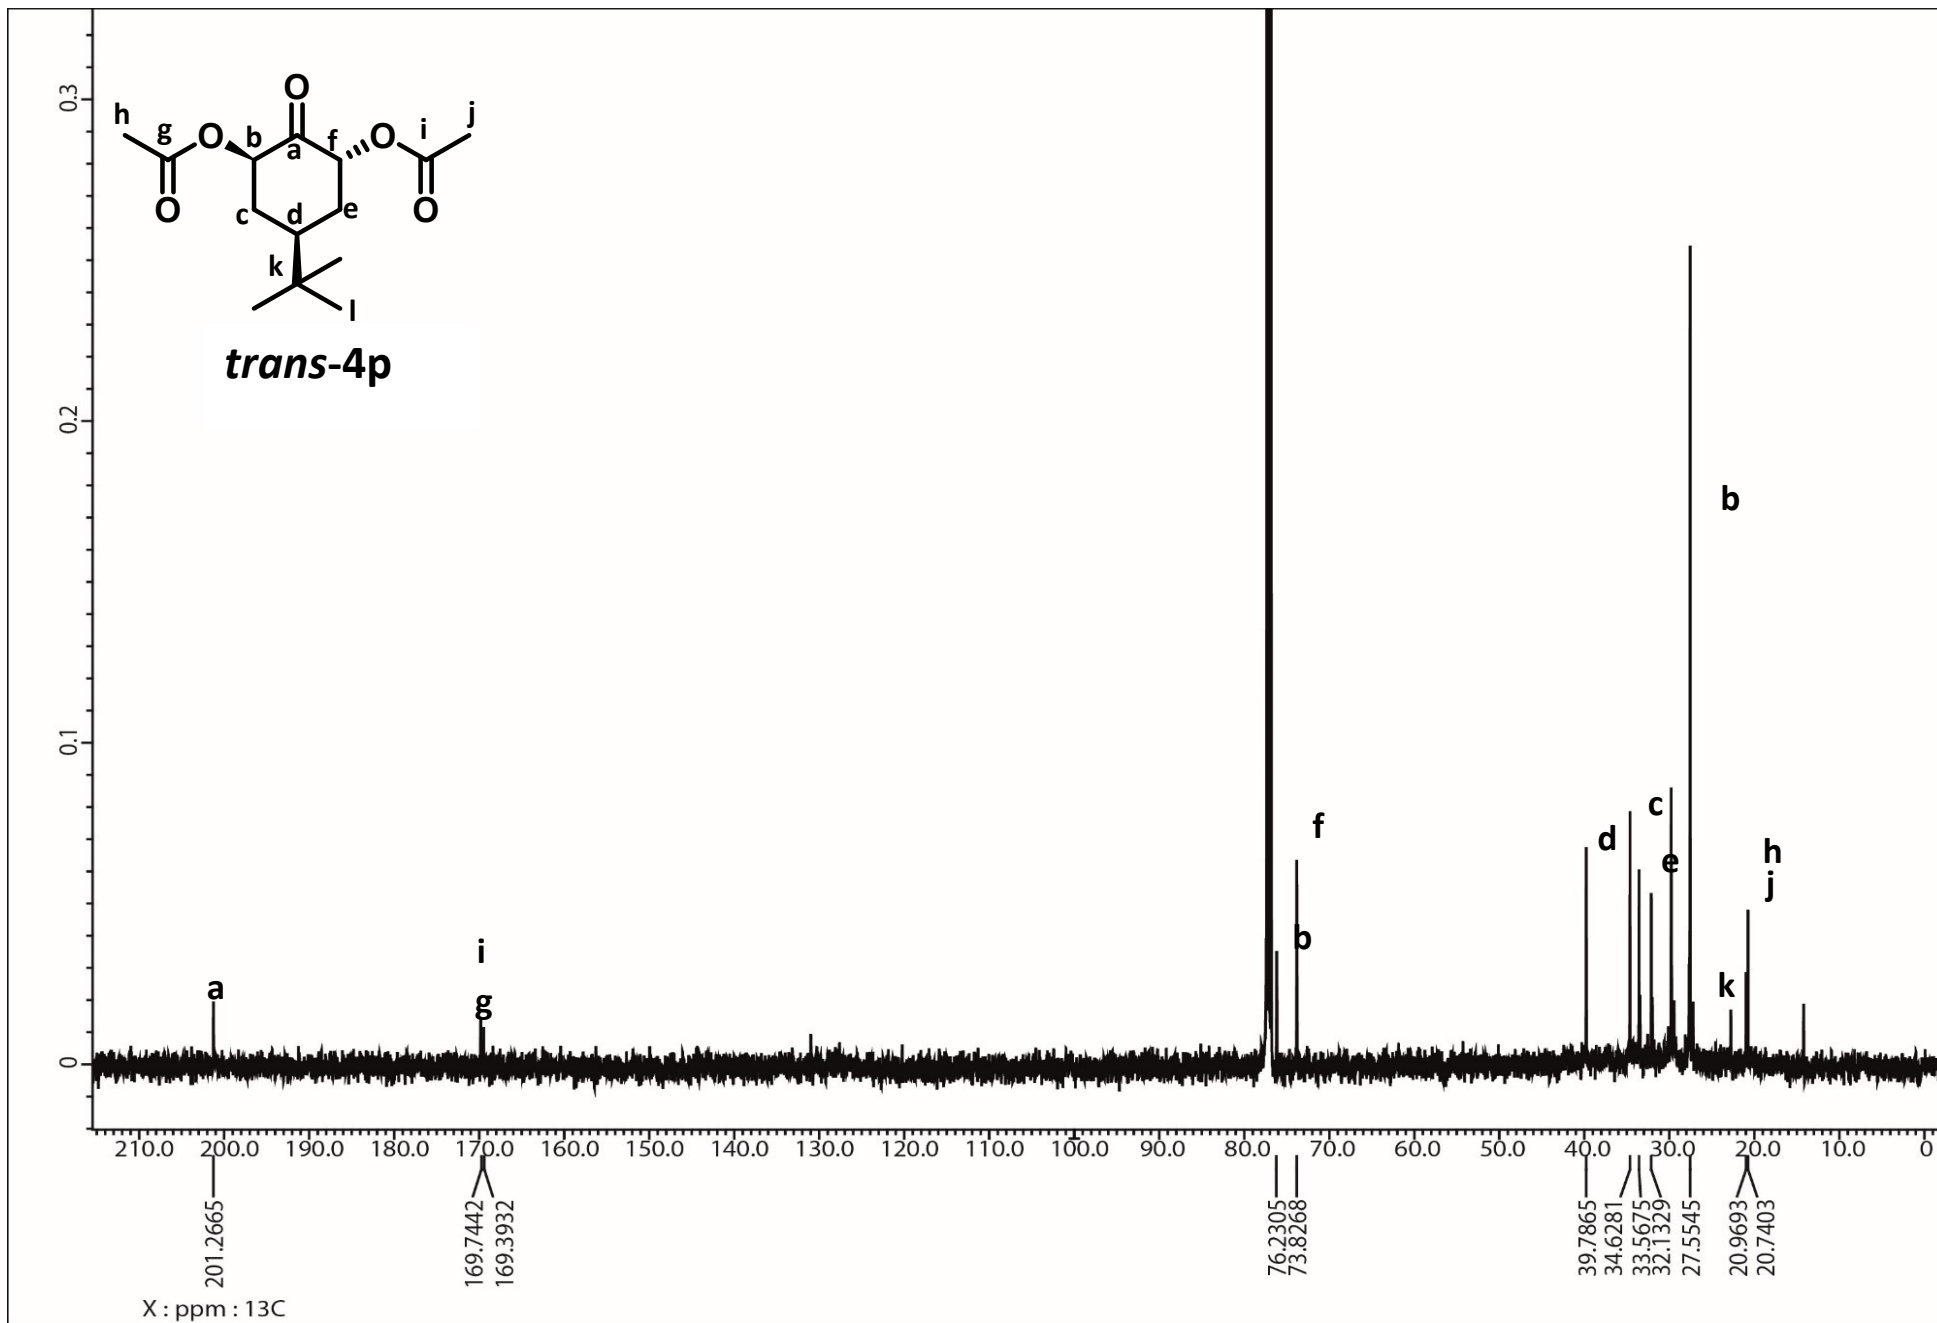

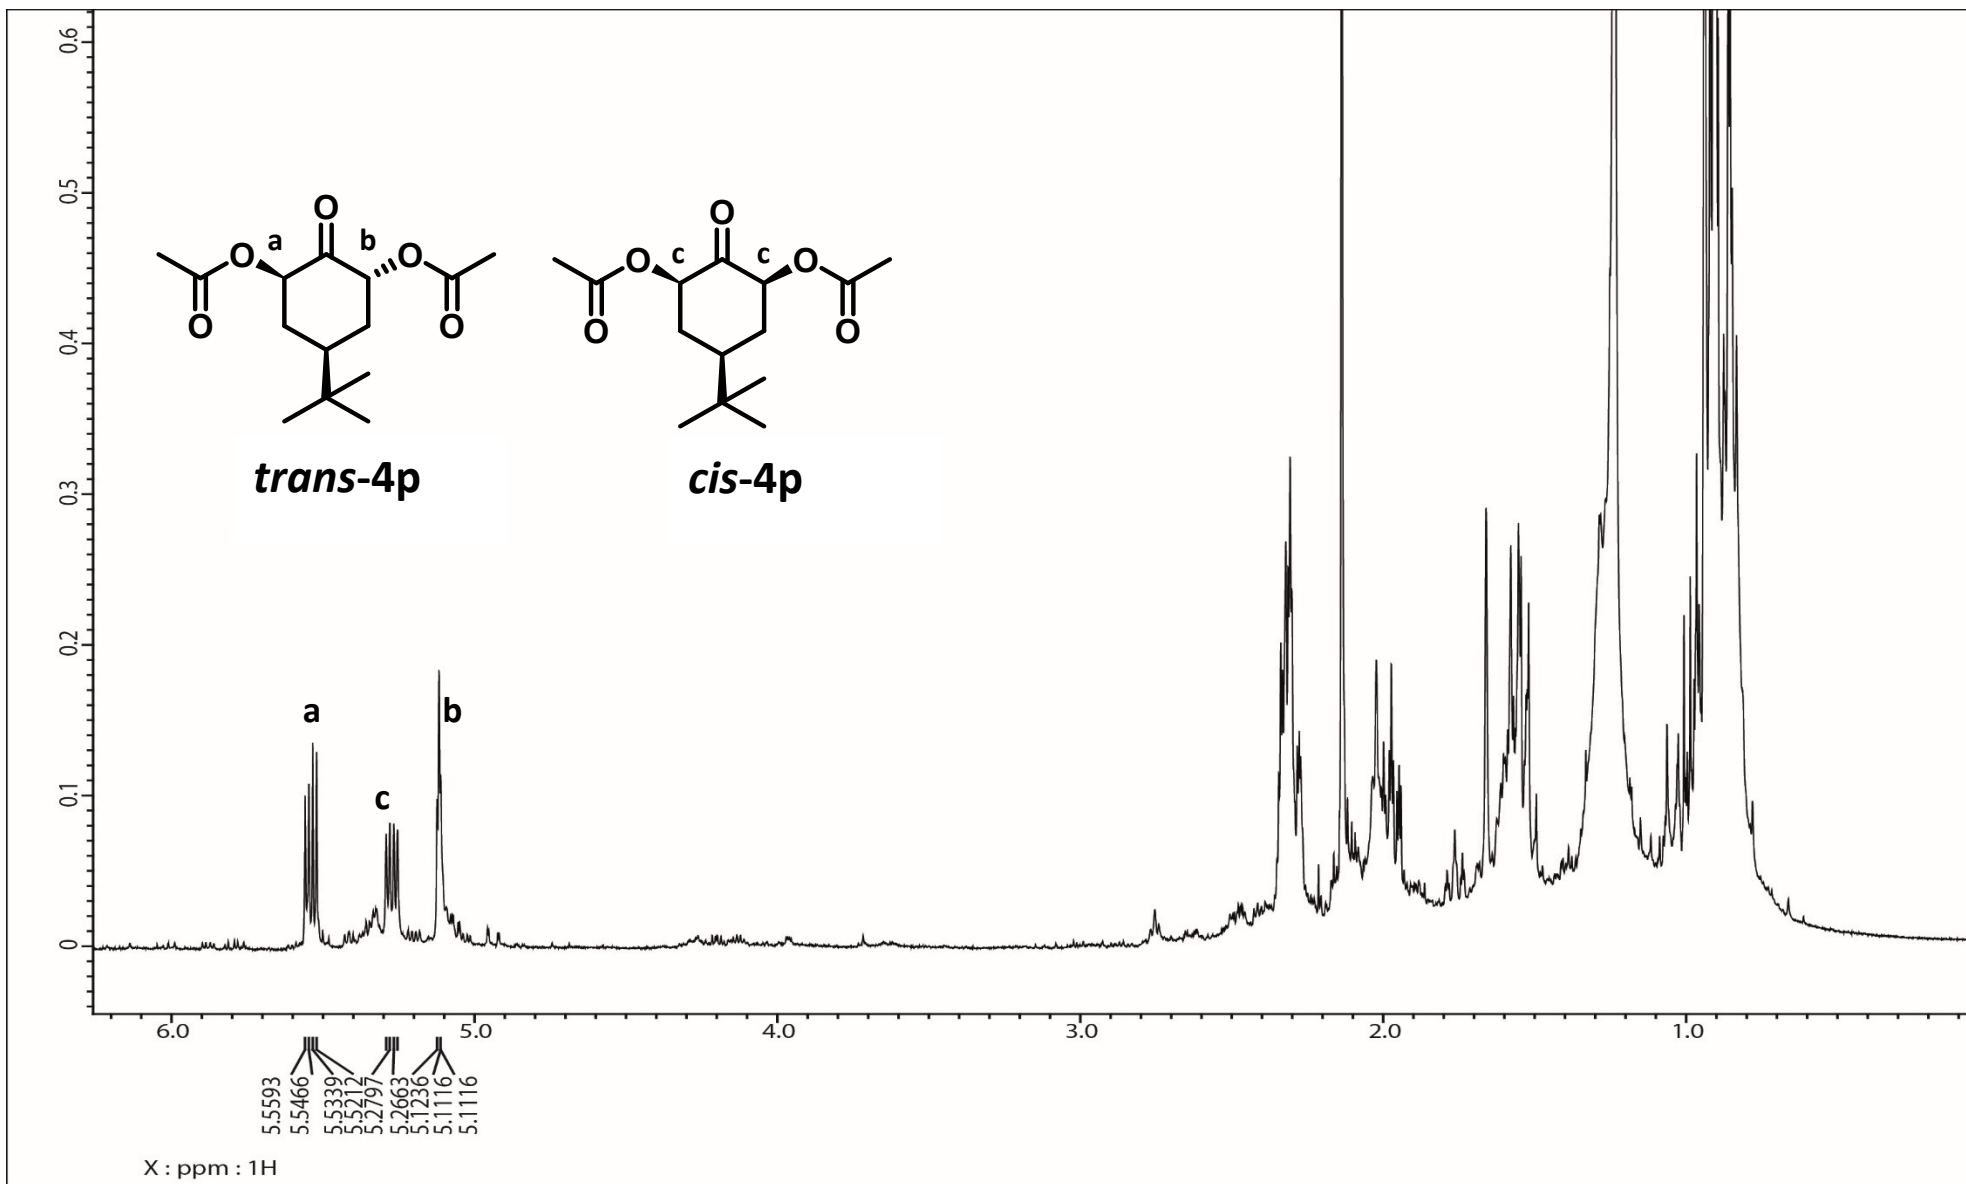

Supplement: d3nj01563g1.pdf [file d3nj01563g1.pdf]
